# Supplementary material for: Mg(ClO4)2-promoted [4 + 3] cycloaddition of oxindole derivatives with conjugated dienes: concise synthesis of spirocycloheptane oxindole derivatives
Source: Royal Society of Chemistry journal article supplement (doi:10.1039/c6ra03259a), 2016-01-01

## Supporting Information

### **Mg(ClO<sub>4</sub>)<sub>2</sub>-Promoted [4 + 3] Cycloaddition of Oxindole Derivatives with Conjugated Dienes: Concise Synthesis of Spirocycloheptane Oxindole Derivatives**

Yun Liu, Zhou Sun, Song Li, Kuirong Xiang, Yuan Zhang,\* and Ying Li\*

State Key Laboratory of Applied Organic Chemistry Lanzhou University, 222nd Tianshui South Rd,  
Lanzhou 730000, Gansu, P. R. China

Fax: +86-931-8912582; E-mail: liying@lzu.edu.cn.

#### **Table of Contents**

1. General Information.
2. Optimization of the reaction condition.
3. Preparation of Substrates **3a-3k** and Analytic Data.
4. Synthesis of Products **5a-5k** and Analytic Data.
5. Additional Experiments.
6. Relative Configuration and X-Ray Analysis Data.
7. References.

## 1. General information

Chemicals were either purchased or purified by standard techniques without special instructions. CH<sub>2</sub>Cl<sub>2</sub> was dried by distillation over CaH<sub>2</sub>. THF was dried by distillation over Na/K. All moisture-sensitive reactions were performed under an atmosphere of Ar. The silica gel (200-300 meshes) was used for column chromatography and TLC inspections were on silica gel GF254 plates. <sup>1</sup>H NMR and <sup>13</sup>C NMR spectra were measured on a Bruker AM 400 MHz spectrometer, using CDCl<sub>3</sub> as the solvent with tetramethylsilane (TMS) as the internal standard at room temperature. Chemical shifts (δ) are given in ppm relative to TMS, the coupling constants *J* are given in Hz. IR spectra were recorded on a Nicolet NEXUS 670 FT-IR spectrometer. High-resolution mass spectral analysis (HRMS) data were measured on the Bruker Apex II by means of the ESI technique. Melting points were measured on an XT-4 melting point apparatus and were uncorrected.

## 2. Optimization of the reaction condition.

Table 1. Optimization of the reaction condition.<sup>a</sup>

| Entry           | Conditions                         | Solvent                            | T(°C)     | Yield(%) <sup>c</sup> |
|-----------------|------------------------------------|------------------------------------|-----------|-----------------------|
| 1               | TFA                                | DCM                                | -78 to 0  | trace <sup>d</sup>    |
| 2               | TfOH                               | DCM                                | -78 to 0  | trace <sup>d</sup>    |
| 3               | TsOAg                              | DCM                                | -78 to rt | NR <sup>e</sup>       |
| 4               | Tf <sub>2</sub> O/2,6-Lutidine     | DCM                                | -78 to rt | ND <sup>e</sup>       |
| 5               | CSA                                | DCM                                | -78 to rt | NR <sup>e</sup>       |
| 6               | HClO <sub>4</sub>                  | DCM                                | -78       | ND <sup>e</sup>       |
| 7               | SnCl <sub>4</sub>                  | DCM                                | -78 to rt | 18                    |
| 8               | ZnCl <sub>2</sub>                  | DCM                                | rt        | 30                    |
| 9               | ZnCl <sub>2</sub>                  | THF                                | rt        | NR <sup>e</sup>       |
| 10              | FeCl <sub>3</sub>                  | DCM                                | -78 to rt | NR <sup>e</sup>       |
| 11              | CuCl <sub>2</sub>                  | DCM                                | -78 to rt | NR <sup>e</sup>       |
| 12 <sup>b</sup> | AuCl <sub>3</sub>                  | DCM                                | -78       | 17                    |
| 13 <sup>b</sup> | AuCl <sub>3</sub>                  | THF                                | -78       | NR <sup>e</sup>       |
| 14 <sup>b</sup> | AuCl <sub>3</sub>                  | Et <sub>2</sub> O                  | -78       | 13                    |
| 15 <sup>b</sup> | InBr <sub>3</sub>                  | DCM                                | -20       | 12                    |
| 16 <sup>b</sup> | InCl <sub>3</sub>                  | DCM                                | -20       | 15                    |
| 17 <sup>b</sup> | In(OAc) <sub>3</sub>               | DCM                                | -20       | ND <sup>e</sup>       |
| 18              | TiCl <sub>4</sub>                  | DCM                                | -78       | ND <sup>e</sup>       |
| 19              | Zn(ClO <sub>4</sub> ) <sub>2</sub> | DCM                                | rt        | NR <sup>e</sup>       |
| 20              | Mg(ClO <sub>4</sub> ) <sub>2</sub> | DCM                                | 0         | <5                    |
| 21              | Mg(ClO <sub>4</sub> ) <sub>2</sub> | DCM                                | rt        | 58                    |
| 22              | Mg(ClO <sub>4</sub> ) <sub>2</sub> | DCM                                | reflux    | ND <sup>e</sup>       |
| 23              | Mg(ClO <sub>4</sub> ) <sub>2</sub> | THF                                | rt        | 20                    |
| 24              | Mg(ClO <sub>4</sub> ) <sub>2</sub> | Et <sub>2</sub> O                  | rt        | 25                    |
| 25              | Mg(ClO <sub>4</sub> ) <sub>2</sub> | Tol                                | rt        | NR <sup>e</sup>       |
| 26              | Mg(ClO <sub>4</sub> ) <sub>2</sub> | CH <sub>3</sub> CH <sub>2</sub> OH | rt        | NR <sup>e</sup>       |
| 27              | Mg(ClO <sub>4</sub> ) <sub>2</sub> | CH <sub>3</sub> COCH <sub>3</sub>  | rt        | NR <sup>e</sup>       |
| 28              | Mg(ClO <sub>4</sub> ) <sub>2</sub> | CH <sub>3</sub> CN                 | rt        | ND <sup>e</sup>       |

|    |                                    |                                      |    |                 |
|----|------------------------------------|--------------------------------------|----|-----------------|
| 29 | Mg(ClO <sub>4</sub> ) <sub>2</sub> | DMF                                  | rt | ND <sup>e</sup> |
| 30 | Mg(ClO <sub>4</sub> ) <sub>2</sub> | CH <sub>2</sub> ClCH <sub>2</sub> Cl | rt | NR <sup>e</sup> |

<sup>a</sup> Unless otherwise noted, all reactions were performed on **3** (0.1 mmol, 1.0 eq), **4** (1.0 mmol, 10.0 eq) and Lewis acids or Brønsted acids (0.15 mmol, 1.5 eq) in solvent (15 mL). <sup>b</sup> 0.01 mmol Lewis acids. <sup>c</sup> Yield of isolated product. <sup>d</sup> Determined by <sup>1</sup>H NMR (400 MHz) analysis (starting material was decomposed). <sup>e</sup> NR = no reaction (starting material was recovered); ND = not determined (starting material was decomposed).

### 3. Preparation of Substrates 3a-3k and Analytic Data

**General procedure A:** (the N of isatins were protected with Me/Bn)<sup>1</sup>

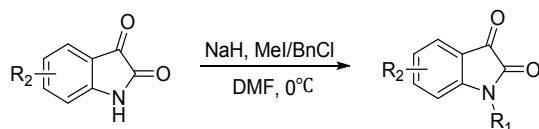

**Scheme S1.** General procedure A

To a solution of isatin (1.0 mmol, 1.0 eq) in 15 mL DMF was added NaH (1.2 mmol, 1.2 eq) at 0 °C. After stirring for 15 min, MeI (1.2 mmol, 1.2 eq) or BnCl (1.2 mmol, 1.2 eq) was added to the mixture at dropwise and the stirring was continued for 1 h at 0 °C. The reaction was then quenched by water and extracted with EtOAc. The organic layer was separated and washed with water and brine respectively. Then the organic layer was dried over Na<sub>2</sub>SO<sub>4</sub>, filtered and concentrated in vacuo. The crude product was purified by flash chromatography on silica gel (Petroleum Ether/EtOAc = 2:1) to afford the products.

**General procedure B:**<sup>2</sup>

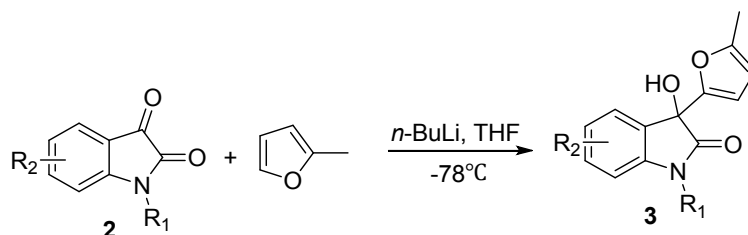

**Scheme S2.** General procedure B

To a solution of 2-methylfuran (1.1 mmol, 1.1 eq) in anhydrous THF (20 mL) at -78 °C was added *n*-BuLi (1.0 mmol, 1.0 eq). After the resulting light yellow coloured solution stirring for 2 h, the corresponding isatin (1.0 mmol, 1.0 eq) in anhydrous THF (20 mL) was added to the mixture at dropwise and the stirring was continued for 1 h at the same temperature. The reaction was then quenched by saturated aqueous NH<sub>4</sub>Cl (2 mL) and was allowed to warm to room temperature. Then the mixture was extracted with EtOAc, and the organic layer was separated and washed with water and brine respectively. Then the organic layer was dried over Na<sub>2</sub>SO<sub>4</sub>, filtered and concentrated in vacuo. The crude product was purified by flash chromatography on silica gel (Petroleum Ether/EtOAc = 4:1) to afford the products.

#### 3a. 3-hydroxy-1-methyl-3-(5-methylfuran-2-yl)indolin-2-one

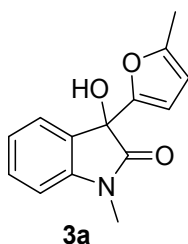

Prepared according to general procedure A and B. The crude product was purified via flash column chromatography (silica gel, PE/EtOAc = 4/1, v/v as eluent) to give the title compound **3a** (89%). And this is an unknown compound. **<sup>1</sup>H NMR (CDCl<sub>3</sub>, 400 MHz):** δ 7.57 (d, *J* = 7.2 Hz, 1H), 7.35 (t, *J* = 7.6 Hz, 1H), 7.12 (t, *J* = 7.6 Hz, 1H), 6.84 (d, *J* = 8.0 Hz, 1H), 6.15 (d, *J* = 2.8 Hz, 1H), 5.87 (d, *J* = 3.2 Hz, 1H), 3.98 (s, 1H), 3.19 (s, 3H), 2.27 (s, 3H); **<sup>13</sup>C NMR (CDCl<sub>3</sub>, 100 MHz):** δ 175.1, 154.0, 149.2, 143.4, 130.1, 128.3, 125.4, 123.2, 110.0, 108.6, 106.3, 73.3, 26.4, 13.7; **HRMS-ESI (m/z):** calcd for C<sub>14</sub>H<sub>13</sub>NO<sub>3</sub>[M + Na]<sup>+</sup>: 266.0788; found: 266.0784.

### 3b. 1-benzyl-3-hydroxy-3-(5-methylfuran-2-yl)indolin-2-one

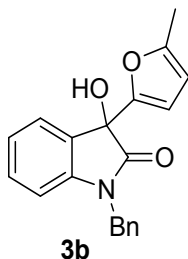

Prepared according to general procedure A and B. The crude product was purified via flash column chromatography (silica gel, PE/EtOAc = 4/1, v/v as eluent) to give the title compound **3b** (84%). And this is an unknown compound. **<sup>1</sup>H NMR (CDCl<sub>3</sub>, 400 MHz):** δ 7.59 (d, *J* = 7.6 Hz, 1H), 7.32-7.21 (m, 6H), 7.09 (t, *J* = 7.6 Hz, 1H), 6.70 (d, *J* = 7.6 Hz, 1H), 6.21 (d, *J* = 2.8 Hz, 1H), 5.92 (d, *J* = 3.2 Hz, 1H), 5.03 (d, *J* = 16.0 Hz, 1H), 4.81 (d, *J* = 16.0 Hz, 1H), 3.58 (s, 1H), 2.30 (s, 3H); **<sup>13</sup>C NMR (CDCl<sub>3</sub>, 100 MHz):** δ 175.3, 154.0, 149.3, 142.6, 135.2, 130.0, 128.8, 128.4, 127.7, 127.0, 125.4, 123.3, 109.8, 109.7, 106.4, 73.5, 43.8, 13.7; **HRMS-ESI (m/z):** calcd for C<sub>20</sub>H<sub>17</sub>NO<sub>3</sub>[M + Na]<sup>+</sup>: 342.1101; found: 342.1097.

### 3c. 3-hydroxy-1,5-dimethyl-3-(5-methylfuran-2-yl)indolin-2-one

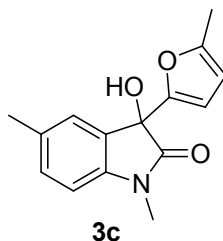

Prepared according to general procedure A and B. The crude product was purified via flash column chromatography (silica gel, PE/EtOAc = 4/1, v/v as eluent) to give the title compound **3c** (74%). And this is an unknown compound. **<sup>1</sup>H NMR (CDCl<sub>3</sub>, 400 MHz):** δ 7.38 (s, 1H), 7.16 (d, *J* = 8.0 Hz, 1H), 6.75 (d, *J* = 8.0 Hz, 1H), 6.15 (d, *J* = 3.2 Hz, 1H), 5.89 (d, *J* = 2.4 Hz, 1H), 3.37 (s, 1H), 3.20 (s, 3H), 2.36 (s, 3H), 2.30 (s, 3H); **<sup>13</sup>C NMR (CDCl<sub>3</sub>, 100 MHz):** δ 175.2, 153.8, 149.5, 141.1, 132.9, 130.3, 128.4, 126.0, 109.8, 108.3, 106.3, 73.5, 26.4, 21.0, 13.7; **HRMS-ESI (m/z):** calcd for C<sub>15</sub>H<sub>15</sub>NO<sub>3</sub>[M + Na]<sup>+</sup>: 280.0944; found: 280.0939.

### 3d. 5-chloro-3-hydroxy-1-methyl-3-(5-methylfuran-2-yl)indolin-2-one

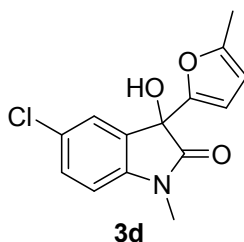

Prepared according to general procedure A and B. The crude product was purified via flash column chromatography (silica gel, PE/EtOAc = 4/1, v/v as eluent) to give the title compound **3d** (70%). And this is an unknown compound. **<sup>1</sup>H NMR (CDCl<sub>3</sub>, 400 MHz):** δ 7.56 (d, *J* = 2.0 Hz, 1H), 7.34 (dd, *J* = 8.4 Hz, *J* = 2.0 Hz, 1H), 6.79 (d, *J* = 8.4 Hz, 1H), 6.19 (d, *J* = 3.2 Hz, 1H), 5.91 (d, *J* = 2.4 Hz, 1H), 3.55 (s, 1H), 3.21 (s, 3H), 2.30 (s, 3H); **<sup>13</sup>C NMR (CDCl<sub>3</sub>, 100 MHz):** δ 174.7, 154.3, 148.4, 142.0, 130.0, 129.7, 128.7, 125.9, 110.2, 109.6, 106.5, 73.2, 26.6, 13.8; **HRMS-ESI (m/z):** calcd for C<sub>14</sub>H<sub>12</sub>ClNO<sub>3</sub>[M + Na]<sup>+</sup>: 300.0398; found: 300.0394.

### 3e. 5-bromo-3-hydroxy-1-methyl-3-(5-methylfuran-2-yl)indolin-2-one

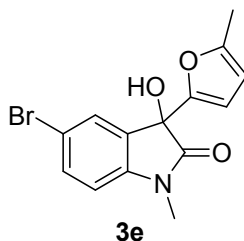

Prepared according to general procedure A and B. The crude product was purified via flash column chromatography (silica gel, PE/EtOAc = 4/1, v/v as eluent) to give the title compound **3e** (42%). And this is an unknown compound. **<sup>1</sup>H NMR (CDCl<sub>3</sub>, 400 MHz):** δ 7.69 (d, *J* = 2.0 Hz, 1H), 7.49 (dd, *J* = 8.4 Hz, *J* = 2.0 Hz, 1H), 6.74 (d, *J* = 8.4 Hz, 1H), 6.19 (d, *J* = 3.2 Hz, 1H), 5.91 (d, *J* = 2.4 Hz, 1H), 3.32 (s, 1H), 3.21 (s, 3H), 2.30 (s, 3H); **<sup>13</sup>C NMR (CDCl<sub>3</sub>, 100 MHz):** δ 174.5, 154.4, 148.5, 142.6, 133.0, 130.1, 128.7, 115.9, 110.3, 110.1, 106.5, 73.2, 26.6, 13.7; **HRMS-ESI (m/z):** calcd for C<sub>14</sub>H<sub>12</sub>BrNO<sub>3</sub>[M + Na]<sup>+</sup>: 343.9893; found: 343.9888.

### 3f. 6-chloro-3-hydroxy-1-methyl-3-(5-methylfuran-2-yl)indolin-2-one

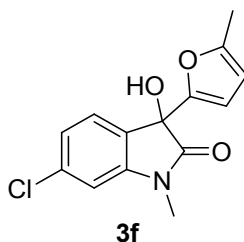

Prepared according to general procedure A and B. The crude product was purified via flash column chromatography (silica gel, PE/EtOAc = 4/1, v/v as eluent) to give the title compound **3f** (72%). And this is an unknown compound. **<sup>1</sup>H NMR (CDCl<sub>3</sub>, 400 MHz):** δ 7.50 (d, *J* = 8.0 Hz, 1H), 7.12 (dd, *J* = 8.0 Hz, *J* = 2.0 Hz, 1H), 6.87 (d, *J* = 1.6 Hz, 1H), 6.15 (d, *J* = 2.8 Hz, 1H), 5.90 (d, *J* = 2.4 Hz, 1H), 3.47 (s, 1H), 3.21 (s, 3H), 2.29 (s, 3H); **<sup>13</sup>C NMR (CDCl<sub>3</sub>, 100 MHz):** δ 175.0, 154.3, 148.6, 144.7, 136.0, 126.5, 126.4, 123.1, 110.1, 109.4, 106.5, 72.9, 26.6, 13.7; **HRMS-ESI (m/z):** calcd for C<sub>14</sub>H<sub>12</sub>ClNO<sub>3</sub>[M + Na]<sup>+</sup>: 300.0398; found: 300.0394.

### 3g. 6-bromo-3-hydroxy-1-methyl-3-(5-methylfuran-2-yl)indolin-2-one

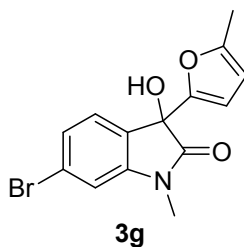

Prepared according to general procedure A and B. The crude product was purified via flash column chromatography (silica gel, PE/EtOAc = 4/1, v/v as eluent) to give the title compound **3g** (62%). And this is an unknown compound. **<sup>1</sup>H NMR (CDCl<sub>3</sub>, 400 MHz):** δ 7.69 (d, *J* = 1.6 Hz, 1H), 7.49 (dd, *J* = 8.4 Hz, *J* = 2.0 Hz, 1H), 6.74 (d, *J* = 8.4 Hz, 1H), 6.19 (d, *J* = 3.2 Hz, 1H), 5.91 (d, *J* = 2.0 Hz, 1H), 3.41 (s, 1H), 3.21 (s, 3H), 2.30 (s, 3H); **<sup>13</sup>C NMR (CDCl<sub>3</sub>, 100 MHz):** δ 174.5, 154.4, 148.4, 142.5, 132.9, 130.1, 128.6, 115.9, 110.3, 110.1, 106.5, 73.2, 26.6, 13.8; **HRMS-ESI (m/z):** calcd for C<sub>14</sub>H<sub>12</sub>BrNO<sub>3</sub>[M + H]<sup>+</sup>: 343.9893; found: 343.9891.

### 3h. 7-fluoro-3-hydroxy-1-methyl-3-(5-methylfuran-2-yl)indolin-2-one

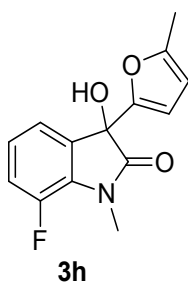

Prepared according to general procedure A and B. The crude product was purified via flash column chromatography (silica gel, PE/EtOAc = 4/1, v/v as eluent) to give the title compound **3h** (85%). And this is an unknown compound. **<sup>1</sup>H NMR (CDCl<sub>3</sub>, 400 MHz):** δ 7.37 (dd, *J* = 6.8 Hz, *J* = 1.6 Hz, 1H), 7.08-7.04 (m, 2H), 6.16 (d, *J* = 3.2 Hz, 1H), 5.88 (d, *J* = 3.2 Hz, 1H), 3.96 (s, 1H), 3.41 (d, *J* = 2.8 Hz, 3H), 2.27 (s, 3H); **<sup>13</sup>C NMR (CDCl<sub>3</sub>, 100 MHz):** δ 174.9, 154.1, 148.9, 148.8, 146.5, 131.1, 131.1, 130.0, 129.9, 123.9, 123.8, 121.3, 121.2, 118.1, 117.9, 110.1, 106.4, 73.3, 73.3, 29.0, 28.9, 13.6; **HRMS-ESI (m/z):** calcd for C<sub>14</sub>H<sub>12</sub>FNO<sub>3</sub>[M+Na]<sup>+</sup>: 284.0693; found: 284.0690.

### 3i. 7-bromo-3-hydroxy-1-methyl-3-(5-methylfuran-2-yl)indolin-2-one

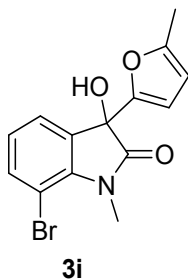

Prepared according to general procedure A and B. The crude product was purified via flash column chromatography (silica gel, PE/EtOAc = 4/1, v/v as eluent) to give the title compound **3i** (48%). And this is an unknown compound. **<sup>1</sup>H NMR (CDCl<sub>3</sub>, 400 MHz):** δ 7.51 (d, *J* = 7.2 Hz, 1H), 7.46 (d, *J* = 8.0 Hz, 1H), 6.98 (t, *J* = 8.0 Hz, 1H), 6.14 (d, *J* = 2.8 Hz, 1H), 5.89 (d, *J* = 2.0 Hz, 1H), 3.60 (s, 4H), 2.28 (s, 3H); **<sup>13</sup>C NMR (CDCl<sub>3</sub>, 100 MHz):** δ 175.6, 154.2, 148.7, 140.8, 135.7, 131.3, 124.6, 124.4, 110.2, 106.4, 102.7, 72.7, 30.1, 13.7; **HRMS-ESI (m/z):** calcd for C<sub>14</sub>H<sub>12</sub>BrNO<sub>3</sub>[M + Na]<sup>+</sup>: 343.9893; found: 343.9891.

### 3j. 7-bromo-3-hydroxy-1,5-dimethyl-3-(5-methylfuran-2-yl)indolin-2-one

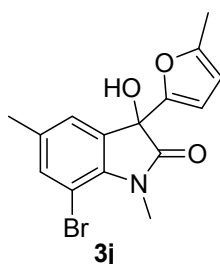

Prepared according to general procedure A and B. The crude product was purified via flash column chromatography (silica gel, PE/EtOAc = 4/1, v/v as eluent) to give the title compound **3j** (74%). And this is an unknown compound. **<sup>1</sup>H NMR (CDCl<sub>3</sub>, 400 MHz):** δ 7.52 (d, *J* = 1.6 Hz, 1H), 7.23 (d, *J* = 1.2 Hz, 1H), 6.16 (d, *J* = 3.2 Hz, 1H), 5.89 (d, *J* = 2.4 Hz, 1H), 3.62 (s, 1H), 3.46 (s, 3H), 2.53 (s, 3H), 2.29 (s, 3H); **<sup>13</sup>C NMR (CDCl<sub>3</sub>, 100 MHz):** δ 175.4, 154.2, 148.8, 140.2, 136.1, 130.8, 126.5, 122.2, 115.6, 110.1, 106.4, 72.7, 29.8, 18.7, 13.7; **HRMS-ESI (m/z):** calcd for C<sub>15</sub>H<sub>14</sub>BrNO<sub>3</sub>[M + Na]<sup>+</sup>: 358.0049; found: 358.0047.

### 3k. 3-hydroxy-1,5,7-trimethyl-3-(5-methylfuran-2-yl)indolin-2-one

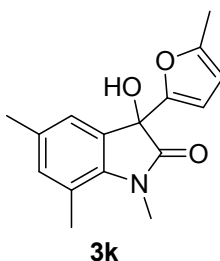

Prepared according to general procedure A and B. The crude product was purified via flash column chromatography (silica gel, PE/EtOAc = 4/1, v/v as eluent) to give the title compound **3k** (67%). And this is an unknown compound. **<sup>1</sup>H NMR (CDCl<sub>3</sub>, 400 MHz):** δ 7.21 (s, 1H), 6.90 (s, 1H), 6.11 (d, *J* = 3.2 Hz, 1H), 5.88 (dd, *J* = 3.2 Hz, *J* = 0.8 Hz, 1H), 3.47 (s, 3H), 3.28 (s, 1H), 2.52 (s, 3H), 2.30 (s, 3H), 2.29 (s, 3H); **<sup>13</sup>C NMR (CDCl<sub>3</sub>, 100 MHz):** δ 175.8, 153.9, 149.7, 138.8, 134.3, 132.8, 128.9, 124.0, 119.9, 109.8, 106.3, 72.9, 29.8, 20.7, 18.8, 13.7; **HRMS-ESI (m/z):** calcd for C<sub>16</sub>H<sub>17</sub>NO<sub>3</sub>[M + Na]<sup>+</sup>: 294.1101; found: 294.1100.

## 4. Synthesis of Products 5a-5k and Analytic Data

**General procedure C:** (The [4+3] cycloaddition reaction)

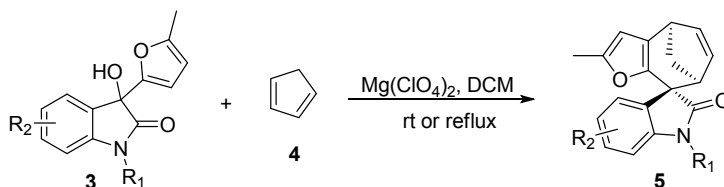

To a solution of **3** (0.1 mmol, 1.0 eq) and Mg(ClO<sub>4</sub>)<sub>2</sub> (0.15 mmol, 1.5 eq) in anhydrous DCM (15 mL), **4** (1.0 mmol, 10.0 eq) in anhydrous DCM (1.0 mL) was added dropwise. The mixture was stirred at room temperature or at refluxing temperature. The reaction progress was monitored by TLC (Petroleum Ether/EtOAc = 16:1) until the reaction complete, then evaporated to afford the crude product. Purification via a column chromatography (Petroleum Ether/EtOAc = 16:1) provided the products.

**5a. 1',2-dimethyl-4,7-dihydrospiro[4,7-methanocyclohepta[b]furan-8,3'-indolin]-2'-one**

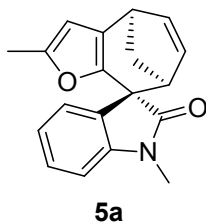

**5a**

Prepared according to general procedure C. The crude product was purified via flash column chromatography (silica gel, PE/EtOAc = 16/1, v/v as eluent) to give the title compound **5a** (58%); **mp**: 165-167 °C; **<sup>1</sup>H NMR (CDCl<sub>3</sub>, 400 MHz)**: δ 7.31 (t, *J* = 7.8 Hz, 1H), 6.95 (t, *J* = 7.6 Hz, 1H), 6.90 (d, *J* = 8.0 Hz, 2H), 6.75 (dd, *J* = 5.2 Hz, *J* = 2.8 Hz, 1H), 5.90 (s, 1H), 5.77 (dd, *J* = 5.2 Hz, *J* = 2.8 Hz, 1H), 3.40 (t, *J* = 3.6 Hz, 1H), 3.28 (s, 3H), 2.99 (d, *J* = 10.0 Hz, 1H), 2.95 (t, *J* = 3.6 Hz, 1H), 2.09 (s, 3H), 2.07-2.04 (m, 1H); **<sup>13</sup>C NMR (CDCl<sub>3</sub>, 100 MHz)**: δ 177.8, 150.0, 146.4, 144.2, 143.4, 129.8, 128.7, 128.4, 127.7, 125.1, 121.9, 108.3, 105.0, 52.9, 49.2, 41.4, 37.9, 26.5, 13.6; **IR (neat)**: 3400, 2954, 1710, 1610, 1492, 1345, 1125, 748 cm<sup>-1</sup>; **HRMS-ESI (m/z)**: calcd for C<sub>19</sub>H<sub>17</sub>NO<sub>2</sub>[M + Na]<sup>+</sup>: 314.1151; found: 314.1148.

**5b. 1'-benzyl-2-methyl-4,7-dihydrospiro[4,7-methanocyclohepta[b]furan-8,3'-indolin]-2'-one**

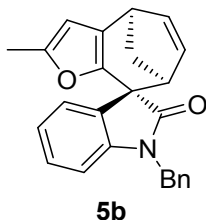

**5b**

Prepared according to general procedure C. The crude product was purified via flash column chromatography (silica gel, PE/EtOAc = 16/1, v/v as eluent) to give the title compound **5b** (74%). **<sup>1</sup>H NMR (CDCl<sub>3</sub>, 400 MHz)**: δ 7.34-7.32 (m, 4H), 7.28-7.25 (m, 2H), 7.18-7.14 (m, 1H), 6.91 (d, *J* = 3.6 Hz, 2H), 6.77-6.75 (m, 2H), 5.92 (s, 1H), 5.79 (dd, *J* = 5.6 Hz, *J* = 3.2 Hz, 1H), 5.09 (d, *J* = 16.0 Hz, 1H), 4.87 (d, *J* = 15.6 Hz, 1H), 3.42 (t, *J* = 3.6 Hz, 1H), 3.07-3.02 (m, 2H), 2.11 (s, 3H); **<sup>13</sup>C NMR (CDCl<sub>3</sub>, 100 MHz)**: δ 177.9, 150.1, 146.5, 144.3, 142.5, 136.0, 129.8, 128.8, 128.7, 128.3, 127.7, 127.5, 127.1, 125.3, 122.0, 109.3, 105.0, 52.9, 49.4, 43.8, 41.6, 37.9, 13.6; **IR (neat)**: 3399, 3055, 2936, 1708, 1611, 1487, 1357, 1265, 738, 701 cm<sup>-1</sup>; **HRMS-ESI (m/z)**: calcd for C<sub>25</sub>H<sub>21</sub>NO<sub>2</sub>[M + Na]<sup>+</sup>: 390.1465; found: 390.1459.

**5c. 1',2,5'-trimethyl-4,7-dihydrospiro[4,7-methanocyclohepta[b]furan-8,3'-indolin]-2'-one**

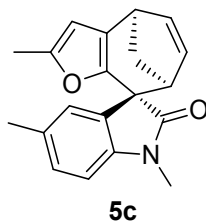

**5c**

Prepared according to general procedure C. The crude product was purified via flash column chromatography (silica gel, PE/EtOAc = 16/1, v/v as eluent) to give the title compound **5c** (63%). **<sup>1</sup>H NMR (CDCl<sub>3</sub>, 400 MHz)**: δ 7.09 (d, *J* = 8.0 Hz, 1H), 6.80-6.75 (m, 2H), 6.72 (s, 1H), 5.91 (d, *J* = 0.8 Hz, 1H), 5.78 (dd, *J* = 5.6 Hz, *J* = 3.2 Hz, 1H), 3.39 (t, *J* = 3.6 Hz, 1H), 3.25 (s, 3H), 3.00 (d, *J* = 10.0 Hz, 1H), 2.93 (t, *J* = 4.4 Hz, 1H), 2.27 (s, 3H), 2.10 (s, 3H), 2.08-2.03 (m, 1H); **<sup>13</sup>C NMR (CDCl<sub>3</sub>, 100 MHz)**: δ 177.7, 150.0, 146.4, 144.4, 141.1, 131.4, 130.0, 128.7, 127.6, 125.9, 108.0, 105.0, 52.9, 49.3, 41.4,



37.9, 26.6, 21.1, 13.6; **IR** (neat): 3392, 2925, 1707, 1618, 1500, 1265, 1090, 737, 703  $\text{cm}^{-1}$ ; **HRMS-ESI** ( $m/z$ ): calcd for  $\text{C}_{20}\text{H}_{19}\text{NO}_2[\text{M} + \text{Na}]^+$ : 328.1308; found: 328.1304.

**5d. 5'-chloro-1',2-dimethyl-4,7-dihydrospiro[4,7-methanocyclohepta[b]furan-8,3'-indolin]-2'-one**

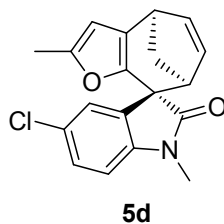

Prepared according to general procedure C. The crude product was purified via flash column chromatography (silica gel, PE/EtOAc = 16/1, v/v as eluent) to give the title compound **5d** (39%).  **$^1\text{H}$  NMR** ( $\text{CDCl}_3$ , 400 MHz):  $\delta$  7.29-7.27 (m, 1H), 6.87 (d,  $J$  = 2.0 Hz, 1H), 6.82 (d,  $J$  = 8.4 Hz, 1H), 6.79-6.77 (m, 1H), 5.92 (d,  $J$  = 0.8 Hz, 1H), 5.77 (dd,  $J$  = 5.2 Hz,  $J$  = 3.2 Hz, 1H), 3.41 (t,  $J$  = 3.6 Hz, 1H), 3.27 (s, 3H), 2.98-2.93 (m, 2H), 2.11 (s, 3H), 2.11-2.05 (m, 1H);  **$^{13}\text{C}$  NMR** ( $\text{CDCl}_3$ , 100 MHz):  $\delta$  177.3, 150.3, 147.0, 143.5, 142.0, 130.5, 129.4, 128.0, 125.4, 125.2, 109.7, 109.2, 105.1, 53.0, 49.2, 41.5, 37.9, 25.9, 13.6; **IR** (neat): 3404, 2939, 1733, 1611, 1490, 1238, 1114, 1069  $\text{cm}^{-1}$ ; **HRMS-ESI** ( $m/z$ ): calcd for  $\text{C}_{19}\text{H}_{16}\text{ClNO}_2[\text{M} + \text{H}]^+$ : 326.0942; found: 326.0938.

**5e. 5'-bromo-1',2-dimethyl-4,7-dihydrospiro[4,7-methanocyclohepta[b]furan-8,3'-indolin]-2'-one**

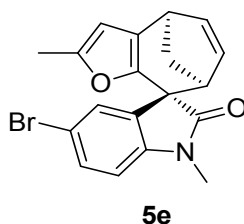

Prepared according to general procedure C. The crude product was purified via flash column chromatography (silica gel, PE/EtOAc = 16/1, v/v as eluent) to give the title compound **5e** (50%).  **$^1\text{H}$  NMR** ( $\text{CDCl}_3$ , 400 MHz):  $\delta$  7.43 (dd,  $J$  = 8.4 Hz,  $J$  = 2.0 Hz, 1H), 7.00 (d,  $J$  = 2.0 Hz, 1H), 6.78 (t,  $J$  = 4.4 Hz, 2H), 5.92 (d,  $J$  = 0.8 Hz, 1H), 5.77 (dd,  $J$  = 5.6 Hz,  $J$  = 3.2 Hz, 1H), 3.41 (t,  $J$  = 4.0 Hz, 1H), 3.26 (s, 3H), 2.97-2.93 (m, 2H), 2.12 (s, 3H), 2.10-2.05 (m, 1H);  **$^{13}\text{C}$  NMR** ( $\text{CDCl}_3$ , 100 MHz):  $\delta$  177.2, 150.3, 147.1, 143.4, 142.5, 131.2, 130.6, 129.4, 128.0, 128.0, 114.7, 109.7, 105.1, 52.9, 49.1, 41.4, 37.8, 26.7, 13.6; **IR** (neat): 2928, 1717, 1606, 1487, 1339, 1096, 731  $\text{cm}^{-1}$ ; **HRMS-ESI** ( $m/z$ ): calcd for  $\text{C}_{19}\text{H}_{16}\text{BrNO}_2[\text{M} + \text{Na}]^+$ : 392.0257; found: 392.0252.

**5f. 6'-chloro-1',2-dimethyl-4,7-dihydrospiro[4,7-methanocyclohepta[b]furan-8,3'-indolin]-2'-one**

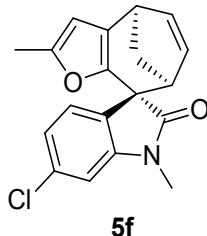

Prepared according to general procedure C. The crude product was purified via flash column chromatography (silica gel, PE/EtOAc = 16/1, v/v as eluent) to give the title compound **5f** (45%).  **$^1\text{H}$  NMR** ( $\text{CDCl}_3$ , 400 MHz):  $\delta$  6.93-6.90 (m, 2H), 6.80 (d,  $J$  = 8.0 Hz, 1H), 6.76-6.74 (m, 1H), 5.90 (s, 1H), 5.72 (dd,  $J$  = 5.6 Hz,  $J$  = 3.2 Hz, 1H), 3.39 (t,  $J$  = 3.2 Hz, 1H),

3.26 (s, 3H), 2.98-2.91 (m, 2H), 2.10 (s, 3H), 2.07-2.03 (m, 1H);  $^{13}\text{C}$  NMR ( $\text{CDCl}_3$ , 100 MHz):  $\delta$  177.7, 150.2, 146.9, 144.6, 143.6, 134.2, 129.5, 127.9, 126.9, 125.9, 121.8, 109.1, 105.0, 52.5, 49.1, 41.4, 37.8, 26.7, 13.6; **IR** (neat): 3417, 2938, 1719, 1607, 1493, 1364, 1076, 732  $\text{cm}^{-1}$ ; **HRMS-ESI** ( $m/z$ ): calcd for  $\text{C}_{19}\text{H}_{16}\text{ClNO}_2[\text{M} + \text{Na}]^+$ : 348.0762; found: 348.0758.

**5g. 6'-bromo-1',2-dimethyl-4,7-dihydrospiro[4,7-methanocyclohepta[b]furan-8,3'-indolin]-2'-one**

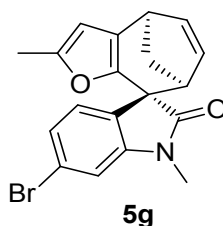

Prepared according to general procedure C. The crude product was purified via flash column chromatography (silica gel, PE/EtOAc = 16/1, v/v as eluent) to give the title compound **5g** (56%).  $^1\text{H}$  NMR ( $\text{CDCl}_3$ , 400 MHz):  $\delta$  7.08 (dd,  $J = 8.0$  Hz,  $J = 2.0$  Hz, 1H), 7.04 (d,  $J = 1.6$  Hz, 1H), 6.75 (dd,  $J = 5.2$  Hz,  $J = 2.4$  Hz, 2H), 5.89 (d,  $J = 0.8$  Hz, 1H), 5.72 (dd,  $J = 5.6$  Hz,  $J = 3.2$  Hz, 1H), 3.39 (t,  $J = 3.6$  Hz, 1H), 3.25 (s, 3H), 2.96 (d,  $J = 10.0$  Hz, 1H), 2.92 (dd,  $J = 4.4$  Hz,  $J = 3.2$  Hz, 1H), 2.09 (s 3H), 2.09-2.03 (m, 1H);  $^{13}\text{C}$  NMR ( $\text{CDCl}_3$ , 100 MHz):  $\delta$  177.5, 150.2, 146.9, 144.8, 143.6, 129.4, 127.9, 127.6, 126.3, 124.7, 122.0, 111.8, 105.0, 52.6, 49.1, 41.4, 37.9, 26.7, 13.5; **IR** (neat): 2929, 1719, 1602, 1491, 1363, 1092, 731  $\text{cm}^{-1}$ ; **HRMS-ESI** ( $m/z$ ): calcd for  $\text{C}_{19}\text{H}_{16}\text{BrNO}_2[\text{M} + \text{Na}]^+$ : 392.0257; found: 392.0253.

**5h. 7'-fluoro-1',2-dimethyl-4,7-dihydrospiro[4,7-methanocyclohepta[b]furan-8,3'-indolin]-2'-one**

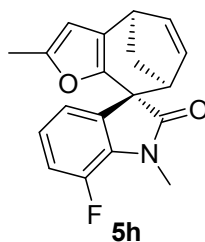

Prepared according to general procedure C. The crude product was purified via flash column chromatography (silica gel, PE/EtOAc = 16/1, v/v as eluent) to give the title compound **5h** (68%).  $^1\text{H}$  NMR ( $\text{CDCl}_3$ , 400 MHz):  $\delta$  7.04-6.98 (m, 1H), 6.88-6.83 (m, 1H), 6.75-6.73 (m, 1H), 6.68-6.66 (m, 1H), 5.90 (d,  $J = 0.8$  Hz, 1H), 5.72 (dd,  $J = 5.2$  Hz,  $J = 2.8$  Hz, 1H), 3.49 (d,  $J = 2.8$  Hz, 3H), 3.39 (t,  $J = 3.6$  Hz, 1H), 3.00-2.94 (m, 2H), 2.10 (d,  $J = 0.8$  Hz, 3H), 2.08-2.03 (m, 1H);  $^{13}\text{C}$  NMR ( $\text{CDCl}_3$ , 100 MHz):  $\delta$  177.4, 150.2, 149.1, 146.6, 146.6, 143.7, 131.4, 131.4, 130.0, 129.9, 129.5, 127.7, 122.3, 122.3, 121.0, 120.9, 116.4, 116.2, 105.0, 53.0, 53.0, 49.3, 41.3, 37.8, 29.1, 29.0, 13.6; **IR** (neat): 3409, 2947, 1715, 1629, 1486, 1366, 1238, 1117, 909, 733  $\text{cm}^{-1}$ ; **HRMS-ESI** ( $m/z$ ): calcd for  $\text{C}_{19}\text{H}_{16}\text{FNO}_2[\text{M} + \text{Na}]^+$ : 332.1057; found: 332.1054.

**5i. 7'-bromo-1',2-dimethyl-4,7-dihydrospiro[4,7-methanocyclohepta[b]furan-8,3'-indolin]-2'-one**

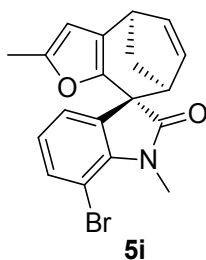

Prepared according to general procedure C. The crude product was purified via flash column chromatography (silica gel, PE/EtOAc = 16/1, v/v as eluent) to give the title compound **5i** (35%). **<sup>1</sup>H NMR (CDCl<sub>3</sub>, 400 MHz):** δ 7.39 (t, *J* = 4.4 Hz, 1H), 6.78-6.77 (m, 2H), 6.75-6.72 (m, 1H), 5.90 (d, *J* = 0.8 Hz, 1H), 5.69 (dd, *J* = 5.2 Hz, *J* = 2.8 Hz, 1H), 3.66 (s, 3H), 3.39 (t, *J* = 3.6 Hz, 1H), 2.99-2.92 (m, 2H), 2.11 (d, *J* = 0.8 Hz, 3H), 2.09-2.04 (m, 1H); **<sup>13</sup>C NMR (CDCl<sub>3</sub>, 100 MHz):** δ 178.2, 150.3, 146.6, 143.7, 140.7, 134.1, 131.6, 129.5, 127.8, 124.1, 123.0, 105.1, 102.5, 52.7, 49.6, 41.5, 37.8, 29.7, 13.6; **IR (neat):** 3366, 2922, 1718, 1601, 1459, 1259, 1104 cm<sup>-1</sup>; **HRMS-ESI (m/z):** calcd for C<sub>19</sub>H<sub>16</sub>BrNO<sub>2</sub>[M + Na]<sup>+</sup>: 392.0257; found: 392.0253.

**5j. 7'-bromo-1',2,5'-trimethyl-4,7-dihydrospiro[4,7-methanocyclohepta[b]furan-8,3'-indolin]-2'-one**

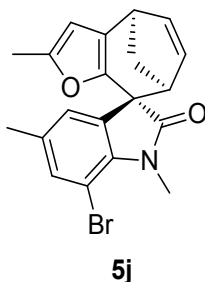

Prepared according to general procedure C. The crude product was purified via flash column chromatography (silica gel, PE/EtOAc = 16/1, v/v as eluent) to give the title compound **5j** (52%). **<sup>1</sup>H NMR (CDCl<sub>3</sub>, 400 MHz):** δ 7.17 (d, *J* = 1.6 Hz, 1H), 6.80 (d, *J* = 2.0 Hz, 1H), 6.75 (dd, *J* = 5.6 Hz, *J* = 2.8 Hz, 1H), 5.90 (d, *J* = 0.8 Hz, 1H), 5.72 (dd, *J* = 5.6 Hz, *J* = 2.8 Hz, 1H), 3.53 (s, 3H), 3.39 (t, *J* = 3.6 Hz, 1H), 2.97 (d, *J* = 10.4 Hz, 1H), 2.90 (dd, *J* = 4.4 Hz, *J* = 3.2 Hz, 1H), 2.58 (s, 3H), 2.12 (d, *J* = 0.4 Hz, 3H), 2.08-2.03 (m, 1H); **<sup>13</sup>C NMR (CDCl<sub>3</sub>, 100 MHz):** δ 178.0, 150.3, 146.8, 143.8, 140.3, 134.6, 131.1, 129.4, 127.8, 125.9, 121.7, 114.4, 105.1, 52.5, 49.6, 41.5, 37.9, 29.9, 18.9, 13.6; **IR (neat):** 2931, 1711, 1600, 1461, 1331, 1115, 731 cm<sup>-1</sup>; **HRMS-ESI (m/z):** calcd for C<sub>20</sub>H<sub>18</sub>BrNO<sub>2</sub>[M + Na]<sup>+</sup>: 406.0413; found: 406.0410.

**5k. 1',2,5',7'-tetramethyl-4,7-dihydrospiro[4,7-methanocyclohepta[b]furan-8,3'-indolin]-2'-one**

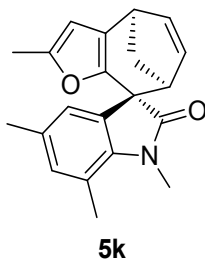

Prepared according to general procedure C. The crude product was purified via flash column chromatography (silica gel, PE/EtOAc = 16:1, v/v as eluent) to give the title compound **5k** (69%). **<sup>1</sup>H NMR (CDCl<sub>3</sub>, 400 MHz):** δ 6.83 (s, 1H), 6.73 (dd, *J* = 5.2 Hz, *J* = 2.8 Hz, 1H), 6.52 (s, 1H), 5.90 (s, 1H), 5.74 (dd, *J* = 5.6 Hz, *J* = 3.2 Hz, 1H), 3.53 (s, 3H), 3.38 (t, *J* = 3.6 Hz, 1H), 3.01 (d, *J* = 10.0 Hz, 1H), 2.90 (t, *J* = 4.0 Hz, 1H), 2.57 (s, 3H), 2.21 (s, 3H), 2.11 (s, 3H), 2.06-2.01 (m, 1H); **<sup>13</sup>C NMR (CDCl<sub>3</sub>, 100 MHz):** δ 178.5, 149.9, 146.1, 144.7, 138.7, 132.7, 131.2, 130.0, 129.2, 127.4, 123.8, 119.5, 105.0, 52.5, 49.6, 41.5, 37.9, 29.9, 20.7, 19.0, 13.7; **IR (neat):** 2930, 1706, 1601, 1475, 1344, 1104, 835, 732 cm<sup>-1</sup>; **HRMS-ESI (m/z):** calcd for C<sub>21</sub>H<sub>21</sub>NO<sub>2</sub>[M + Na]<sup>+</sup>: 342.1465; found: 342.1463.

## 5. Additional Experiments

### a) The scope of allylic alcohols:

We have tried many types of allylic alcohols: such as ethenyl-, alkynyl-, phenyl-, thienyl-, furyl-, benzothiophenyl-group, etc. The unsubstituted furyl-oxindole derivatives could not exist stably for the C2 position of furan is the most reactive site towards electrophiles. And the others could not react with cyclopentadiene under the optimal reaction conditions to achieve the expected spirocycloheptane oxindole skeletons.

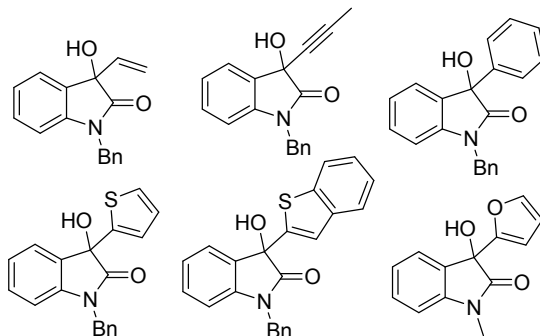

#### b) A control reaction of 2a with thiophenes:

In the experimental results, when we used thiophenes as dienes, only a Friedel–Crafts intermolecular alkylation reaction occurred, giving an ordinary electrophilic adducts **9a** (determined by the single X-ray crystallographic analysis). We expected that these results might support for a two-step pathway mechanism of the intermolecular [4 + 3] cycloaddition reactions.

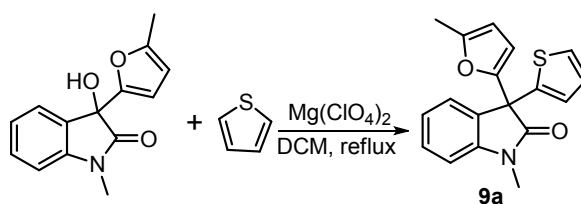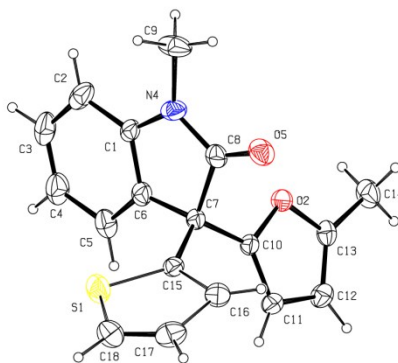

## 6. Relative Configuration and X-Ray Analysis Data

### 5a. 1',2-dimethyl-4,7-dihydrospiro[4,7-methanocyclohepta[b]furan-8,3'-indolin]-2'-one

(The CCDC deposition number: CCDC(**5a**): 1434481)

|                        |                                                 |                                 |
|------------------------|-------------------------------------------------|---------------------------------|
| Bond precision:        | C-C = 0.0024 Å                                  | Wavelength=1.54180              |
| Cell:                  | a=16.9806(5)      b=8.6168(2)      c=20.4475(6) |                                 |
|                        | alpha=90      beta=98.426(3)      gamma=90      |                                 |
| Temperature: 293 K     |                                                 |                                 |
|                        | Calculated                                      | Reported                        |
| Volume                 | 2959.55(14)                                     | 2959.57(14)                     |
| Space group            | C 2/c                                           | C 1 2/c 1                       |
| Hall group             | -C 2yc                                          | -C 2yc                          |
| Moiety formula         | C19 H17 N O2                                    | C19 H17 N O2                    |
| Sum formula            | C19 H17 N O2                                    | C19 H17 N O2                    |
| Mr                     | 291.34                                          | 291.34                          |
| Dx, g cm <sup>-3</sup> | 1.308                                           | 1.308                           |
| Z                      | 8                                               | 8                               |
| Mu (mm <sup>-1</sup> ) | 0.676                                           | 0.676                           |
| F000                   | 1232.0                                          | 1232.0                          |
| F000'                  | 1235.61                                         |                                 |
| h, k, lmax             | 20, 10, 24                                      | 20, 10, 24                      |
| Nref                   | 2817                                            | 2808                            |
| Tmin, Tmax             | 0.907, 0.947                                    | 0.693, 1.000                    |
| Tmin'                  | 0.795                                           |                                 |
| Correction method=     | # Reported T Limits: Tmin=0.693 Tmax=1.000      |                                 |
| AbsCorr =              | MULTI-SCAN                                      |                                 |
| Data completeness=     | 0.997                                           | Theta(max)= 70.050              |
| R(reflections)=        | 0.0639( 2526)                                   | wR2(reflections)= 0.1780( 2808) |
| S =                    | 1.070                                           | Npar= 201                       |

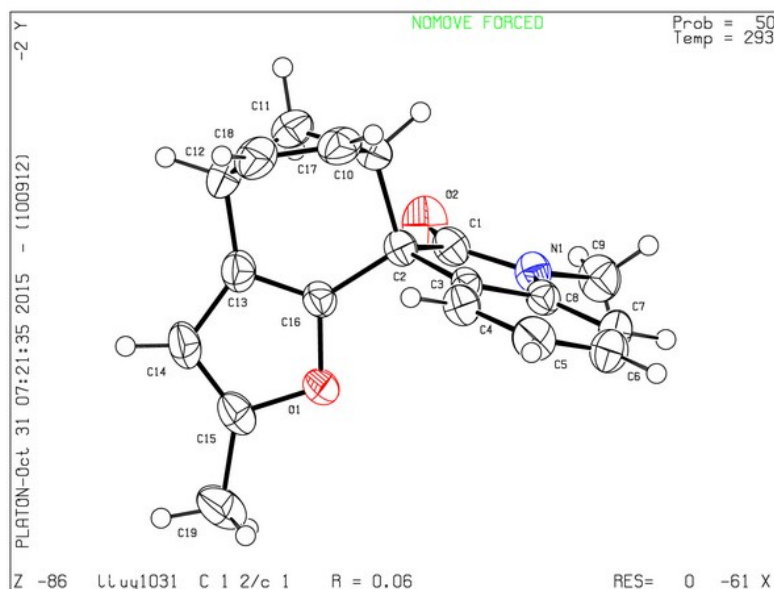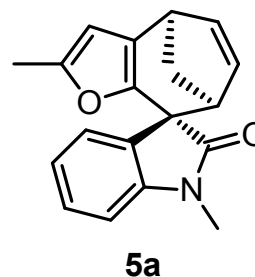

## 9a. 1-methyl-3-(5-methylfuran-2-yl)-3-(thiophen-2-yl)indolin-2-one

(The CCDC deposition number: CCDC(9a): 1456972)

|                        |                                                       |                                 |
|------------------------|-------------------------------------------------------|---------------------------------|
| Bond precision:        | C-C = 0.0070 Å                                        | Wavelength=0.71073              |
| Cell:                  | a=8.282(2)      b=8.6821(17)      c=12.051(3)         |                                 |
|                        | alpha=74.13(2)      beta=82.60(2)      gamma=68.31(2) |                                 |
| Temperature: 244 K     |                                                       |                                 |
|                        | Calculated                                            | Reported                        |
| Volume                 | 774.1(3)                                              | 774.1(3)                        |
| Space group            | P -1                                                  | P -1                            |
| Hall group             | -P 1                                                  | -P 1                            |
| Moiety formula         | C18 H15 N O2 S                                        | C18 H15 N O2 S                  |
| Sum formula            | C18 H15 N O2 S                                        | C18 H15 N O2 S                  |
| Mr                     | 309.37                                                | 309.37                          |
| Dx, g cm <sup>-3</sup> | 1.327                                                 | 1.327                           |
| Z                      | 2                                                     | 2                               |
| Mu (mm <sup>-1</sup> ) | 0.215                                                 | 0.215                           |
| F000                   | 324.0                                                 | 324.0                           |
| F000'                  | 324.38                                                |                                 |
| h, k, lmax             | 10, 10, 14                                            | 10, 10, 14                      |
| Nref                   | 3054                                                  | 3046                            |
| Tmin, Tmax             | 0.920, 0.934                                          | 0.627, 1.000                    |
| Tmin'                  | 0.920                                                 |                                 |
| Correction method= #   | Reported T Limits: Tmin=0.627 Tmax=1.000              |                                 |
| AbsCorr = MULTISCAN    |                                                       |                                 |
| Data completeness=     | 0.997                                                 | Theta(max)= 26.021              |
| R(reflections)=        | 0.0783( 1594)                                         | wR2(reflections)= 0.2516( 3046) |
| S =                    | 1.040                                                 | Npar= 201                       |

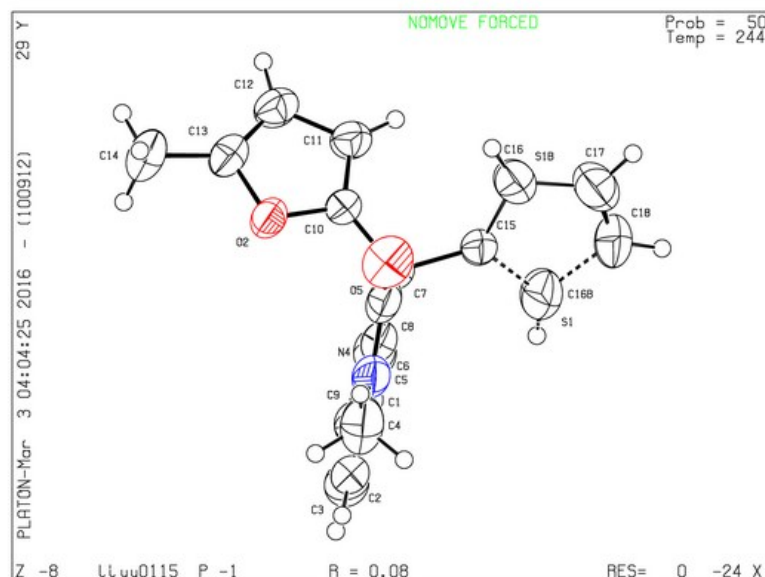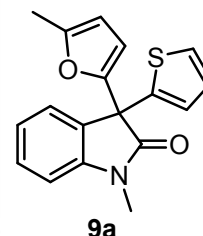

## 7. References.

1. B. M. Trost, K. Hirano, *Angew. Chem. Int. Ed.* 2012, **51**, 6480-6483; *Angew. Chem.* 2012, **124**, 6586.
2. (a) S. Chowdhury, M. Chafeev, S. Liu, J. Sun, V. Raina, R. Chui, W. Young, R. Kwan, J. Fu and J. A. Cadieux, *Bioorg. Med. Chem. Lett.*, 2011, **21**, 3676; (b) T. Teruhisa, U. Takashi, *PCT Int. Appl.* WO0010975.

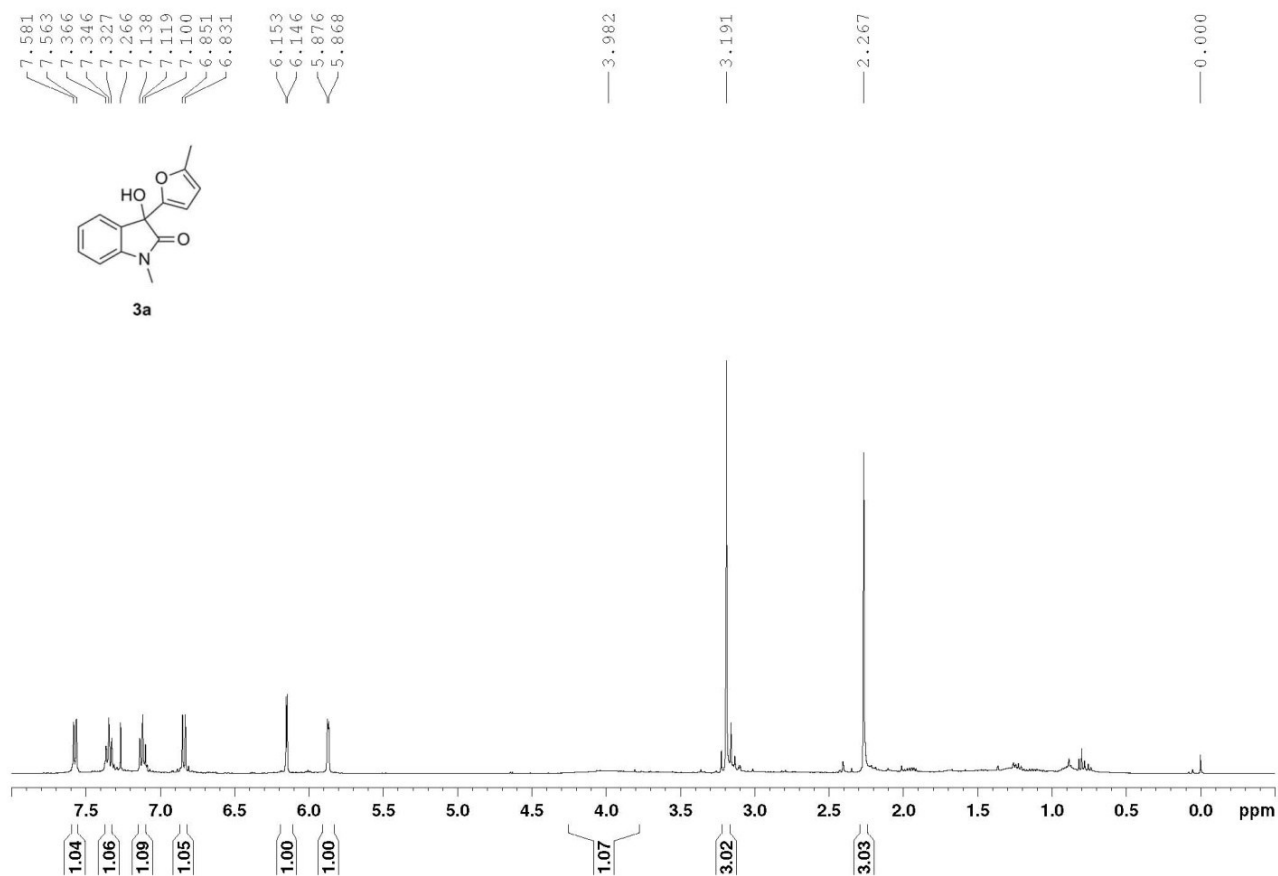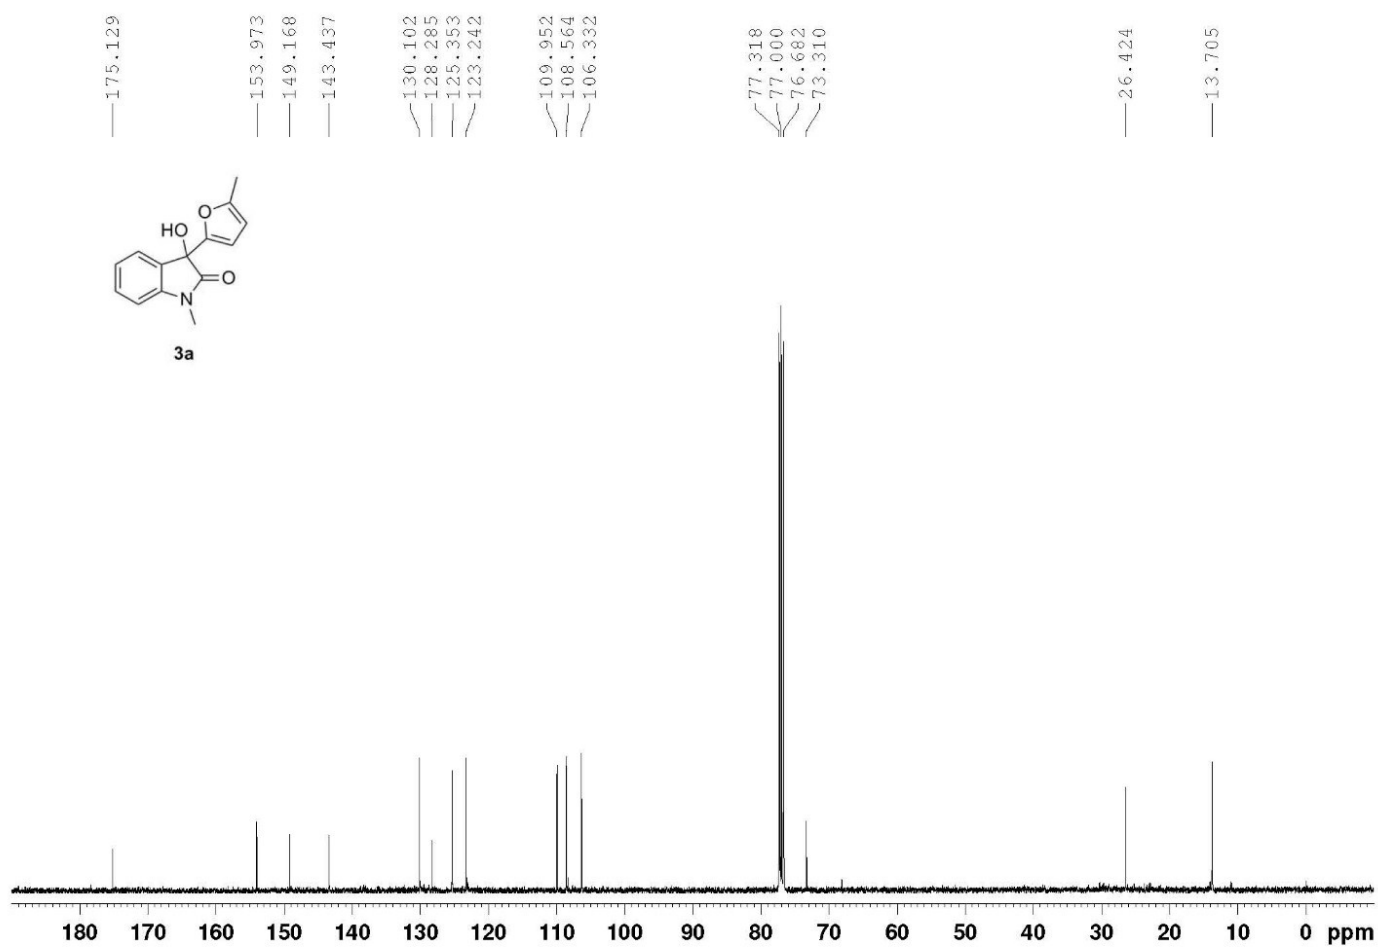

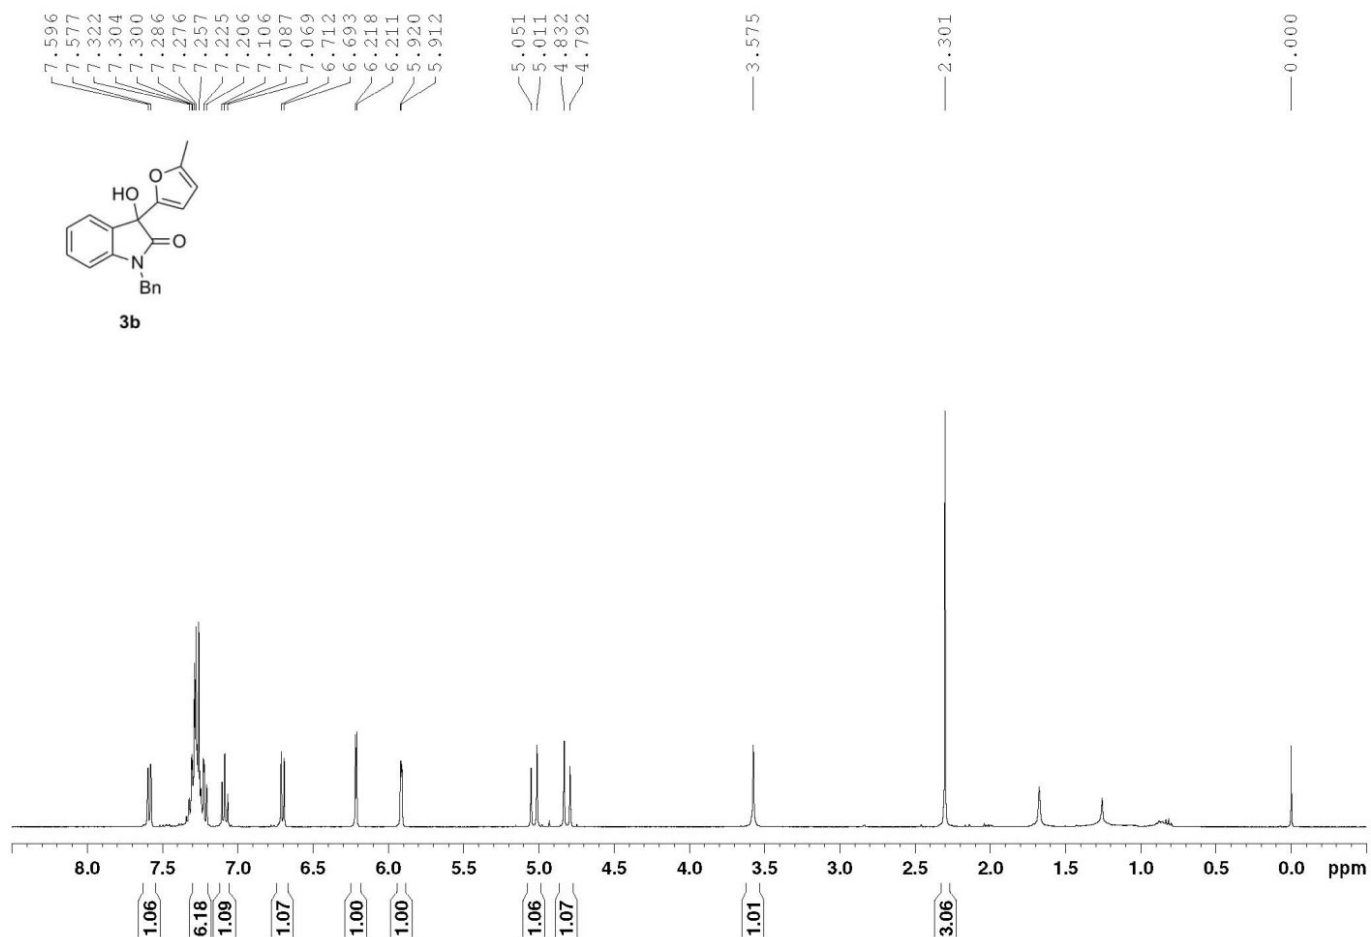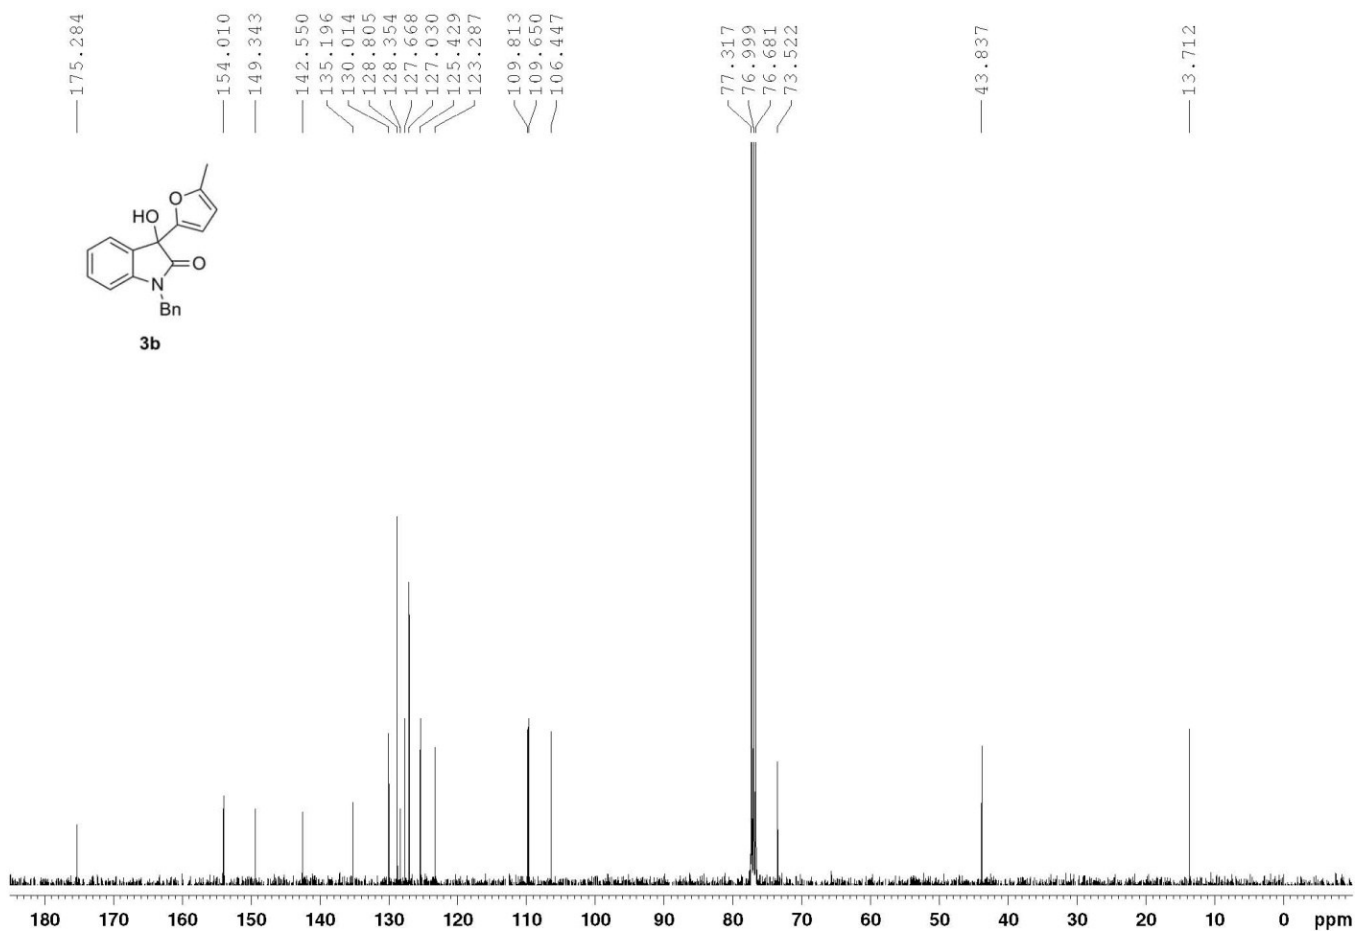



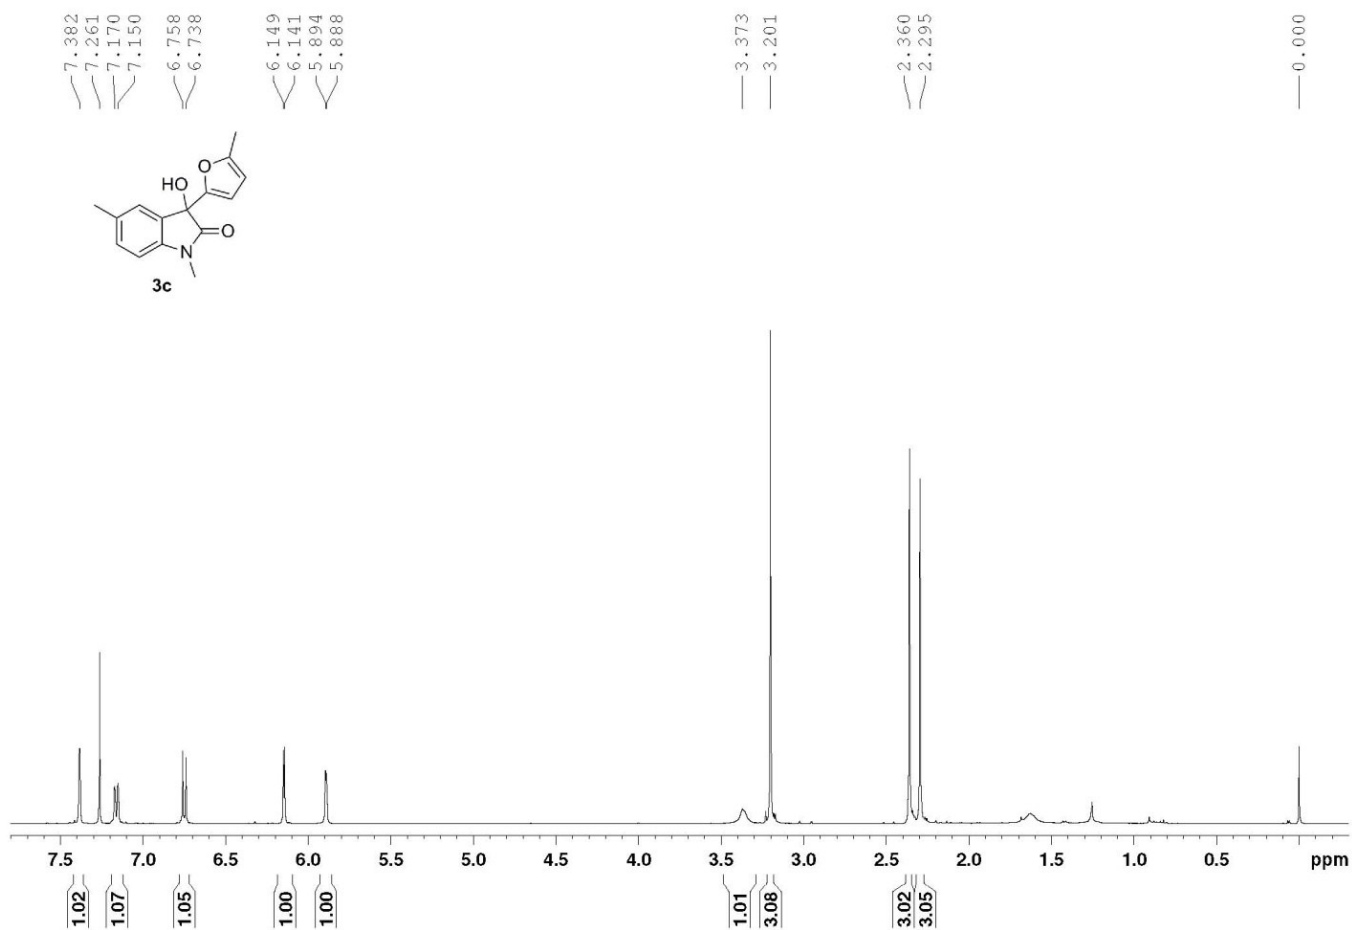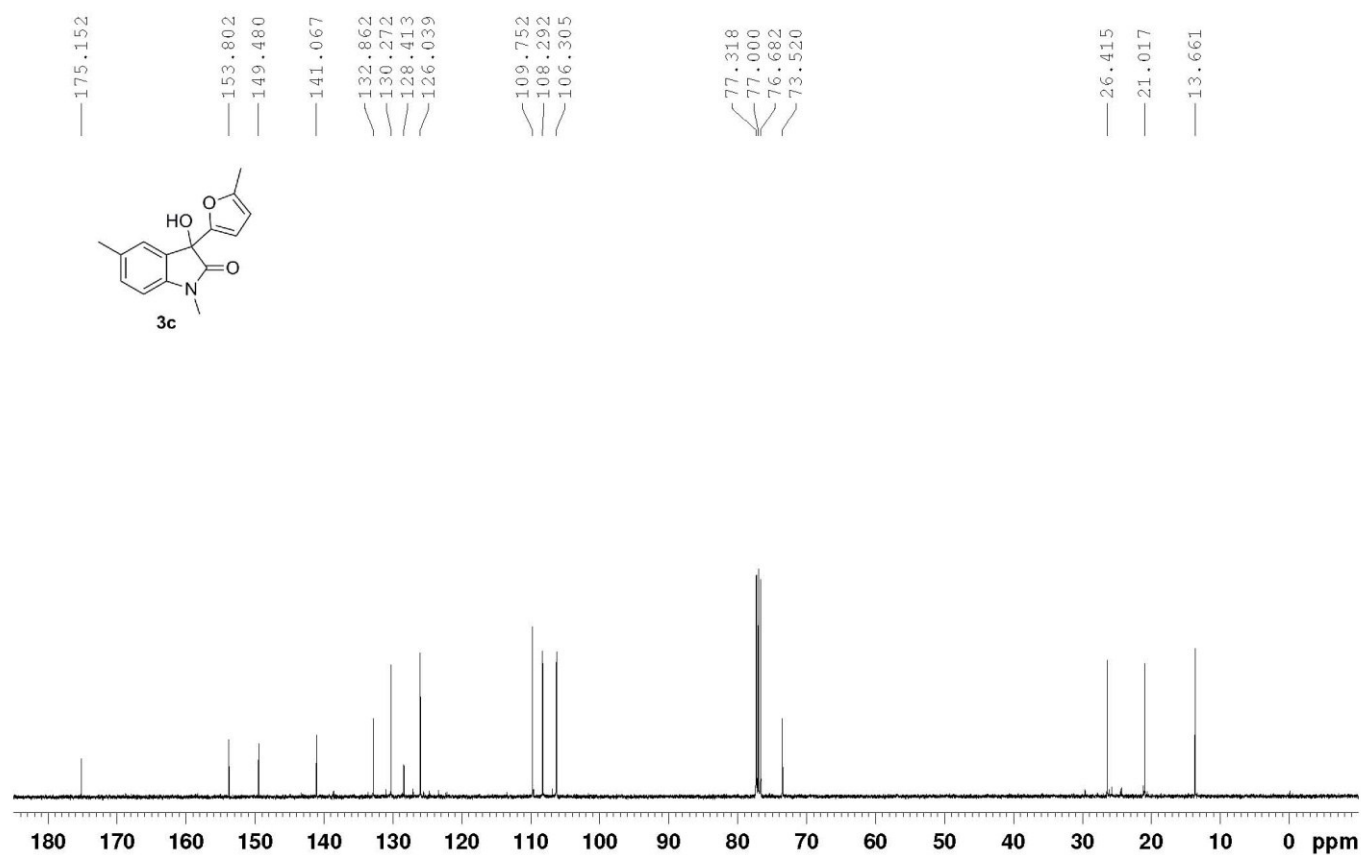

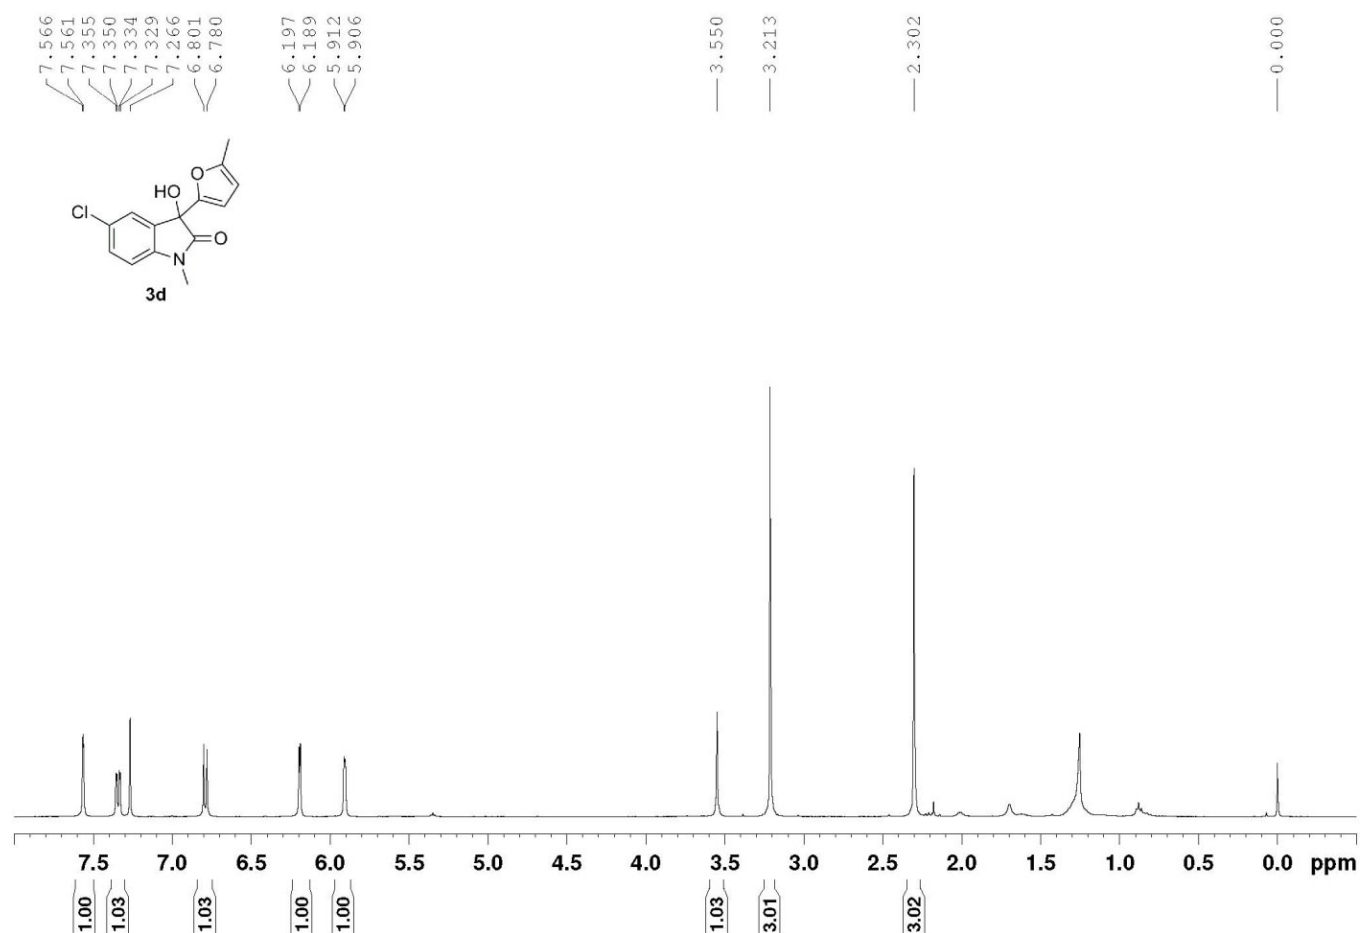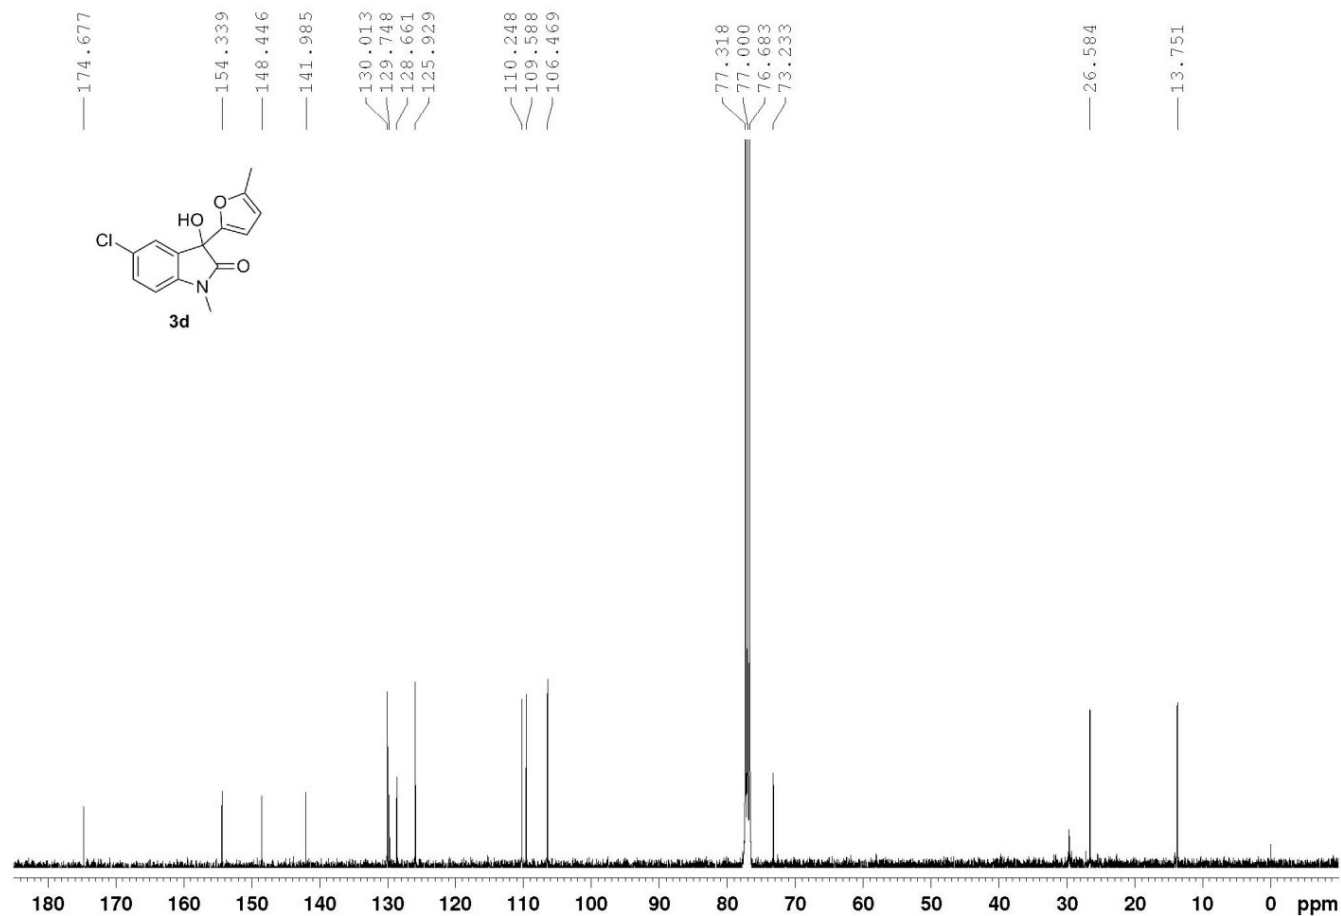

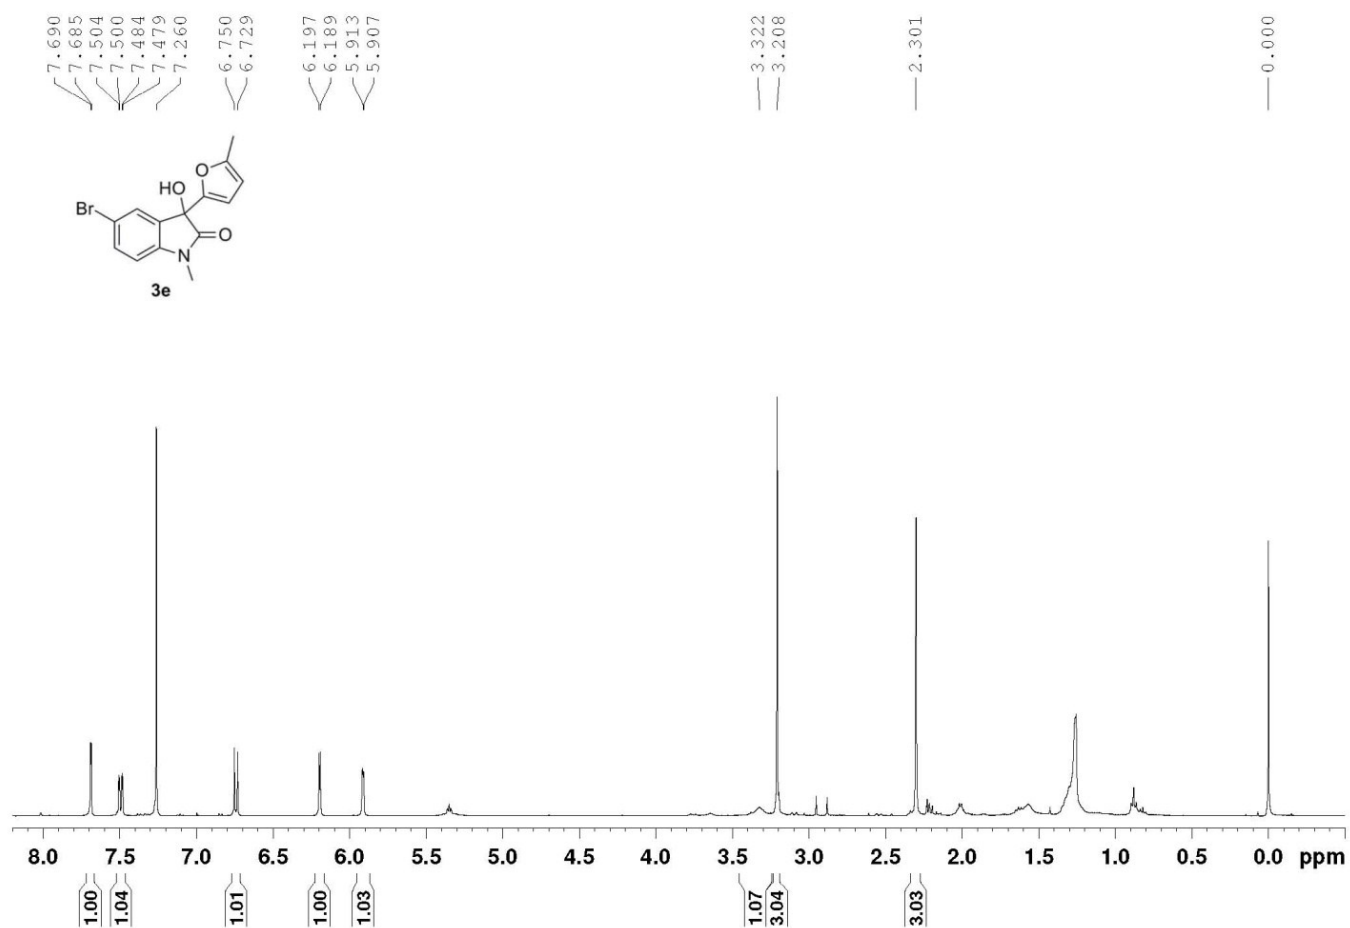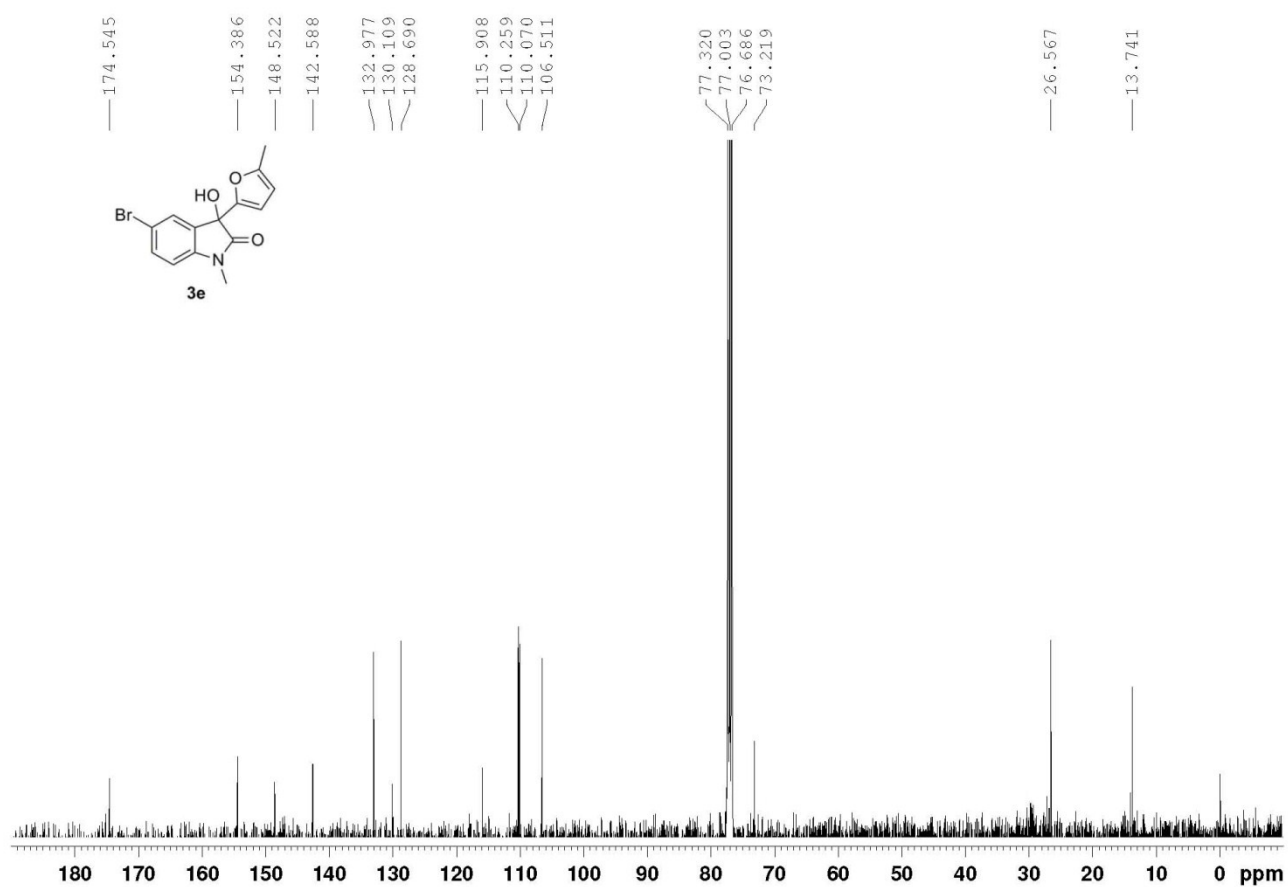

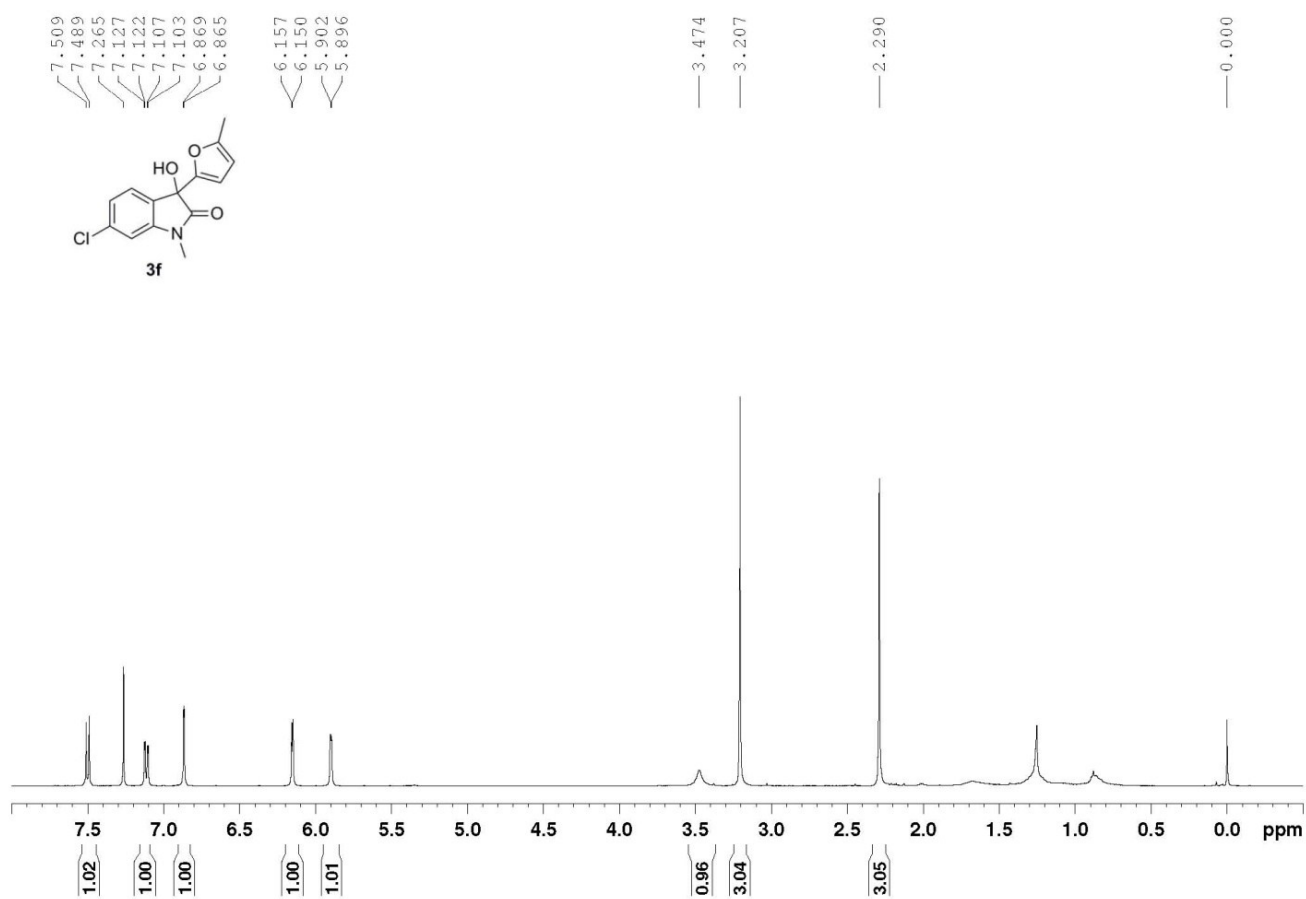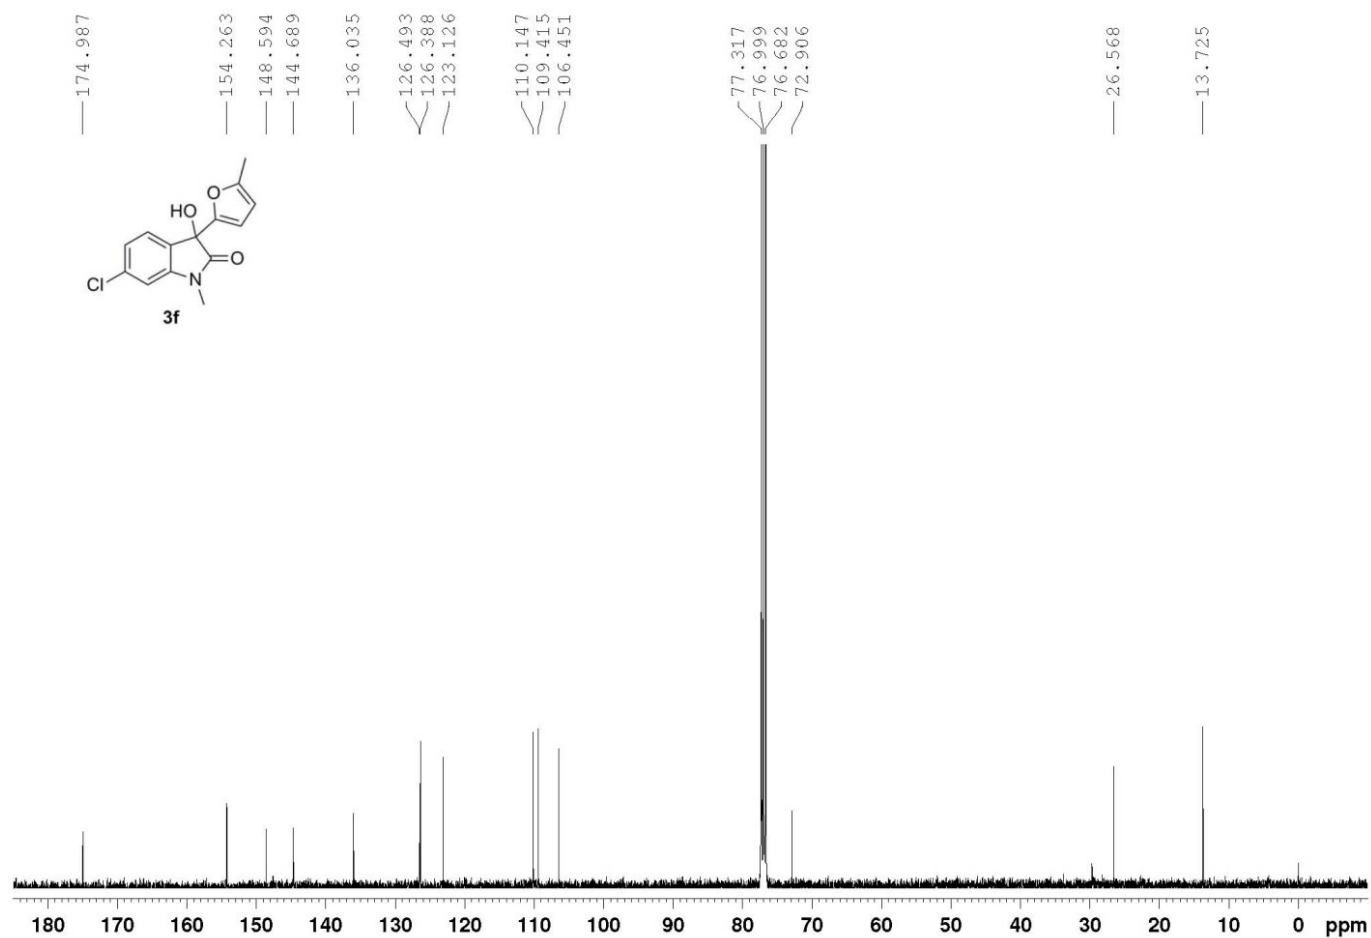

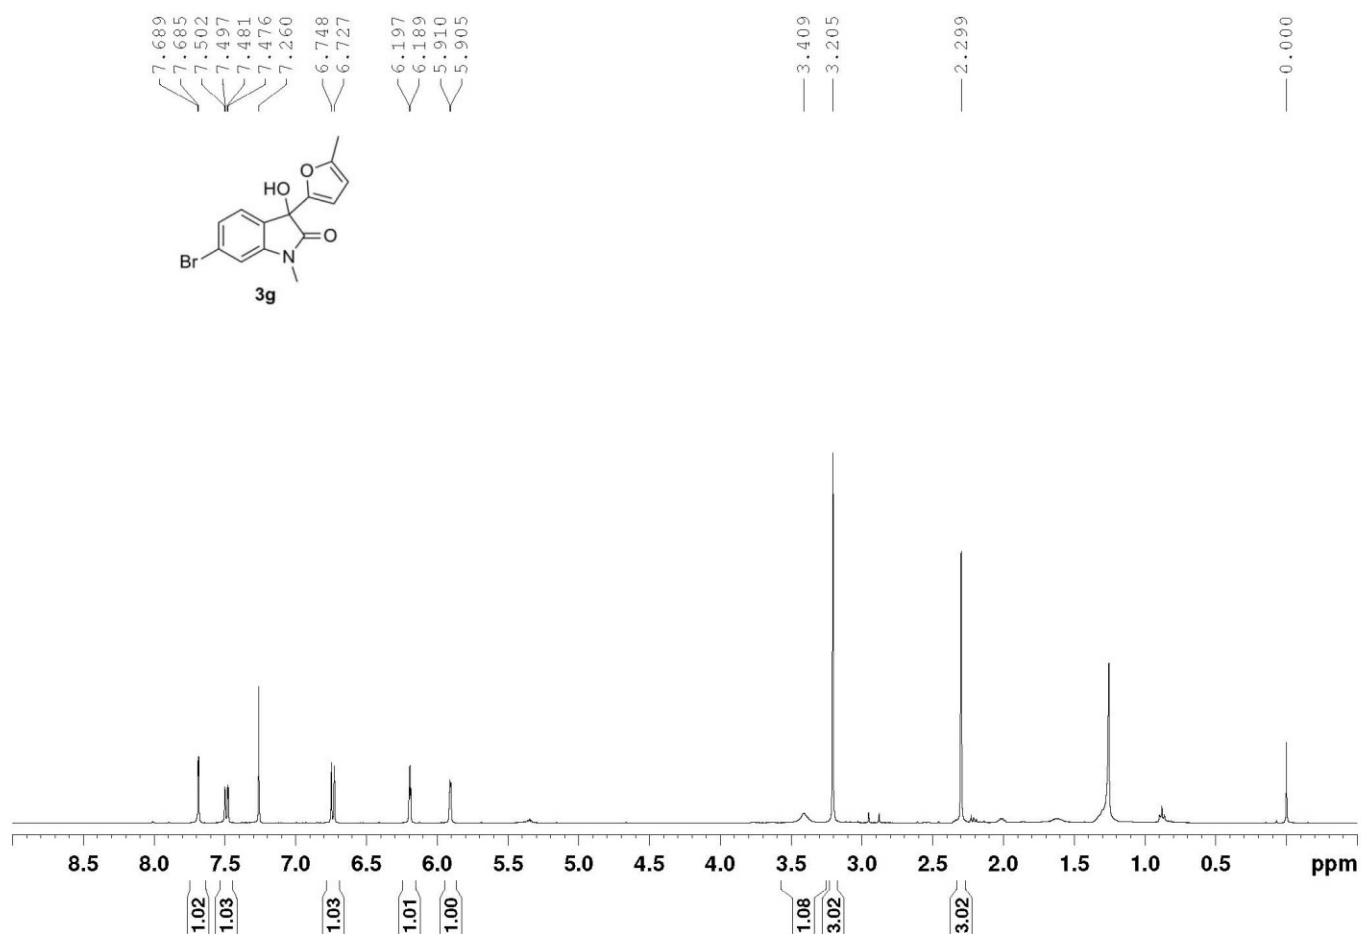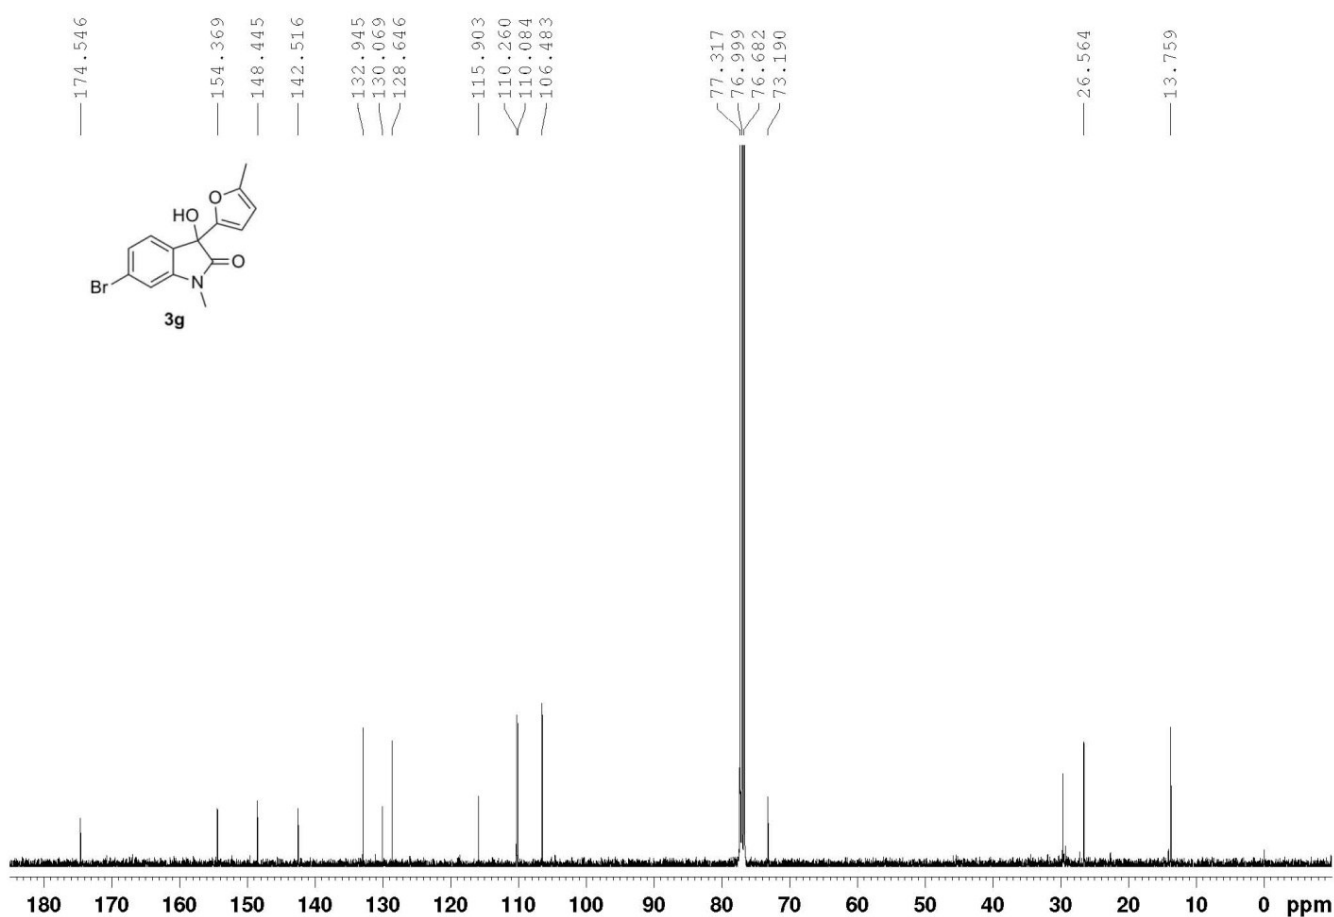

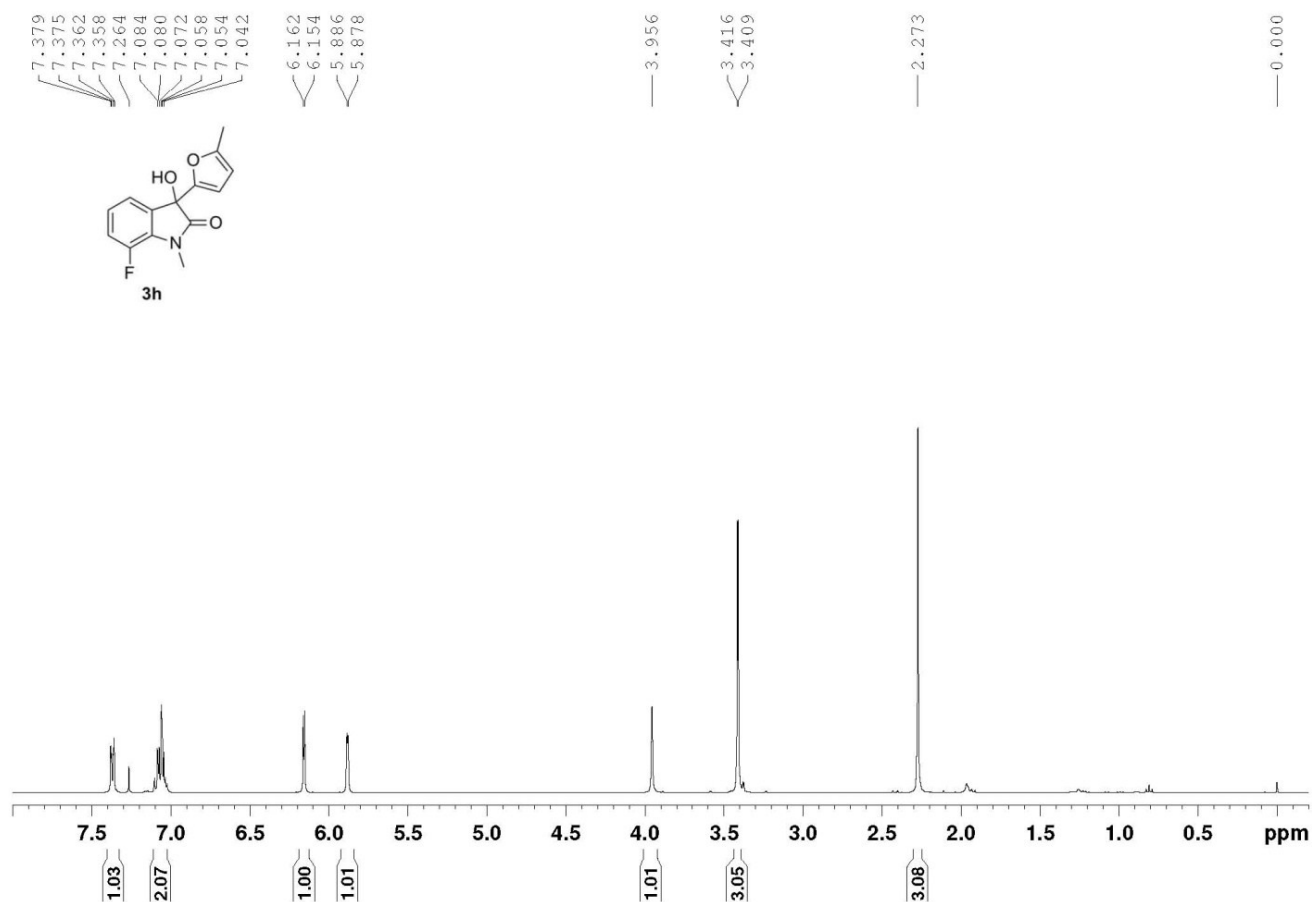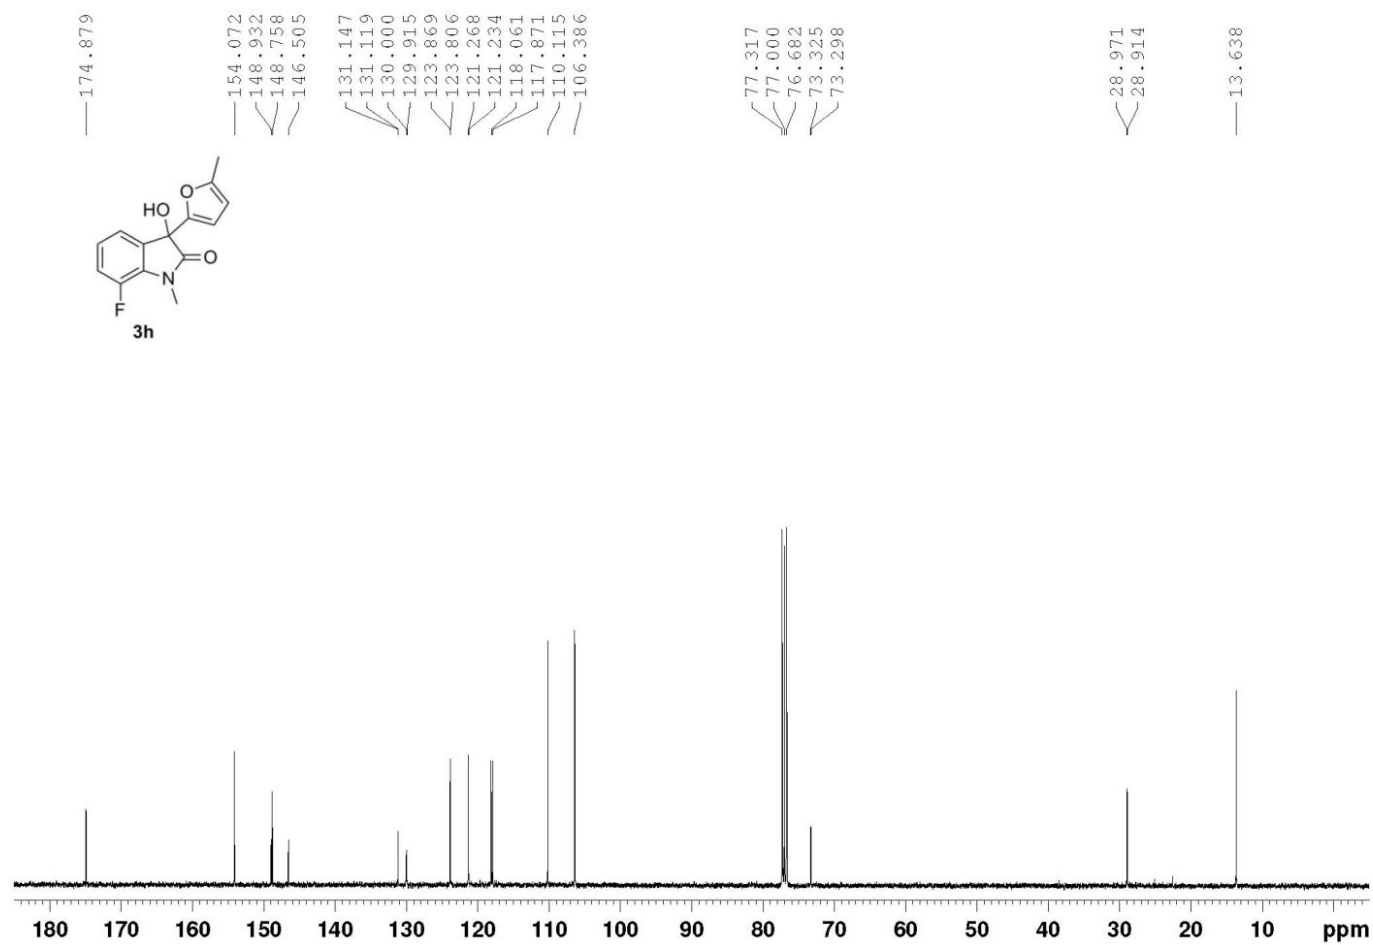

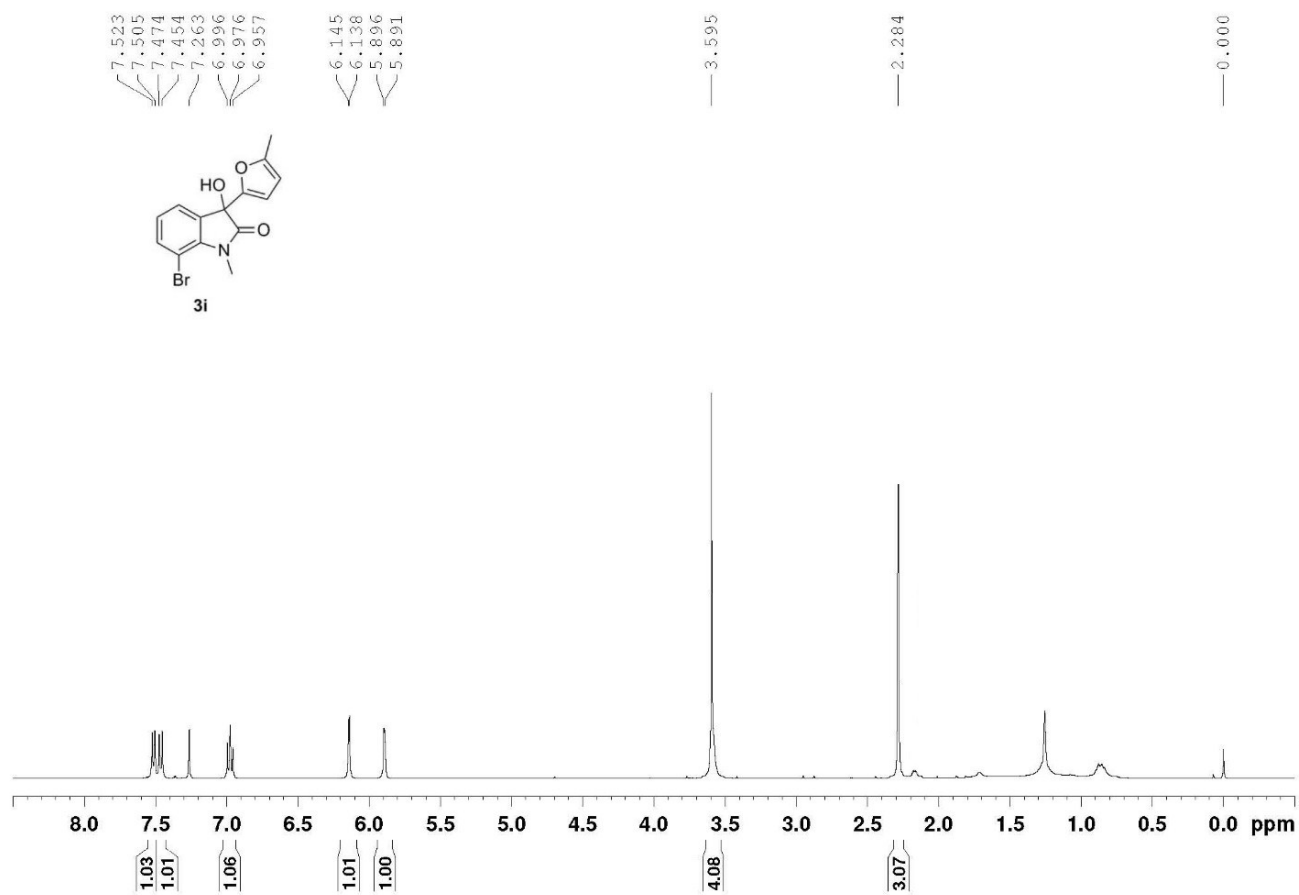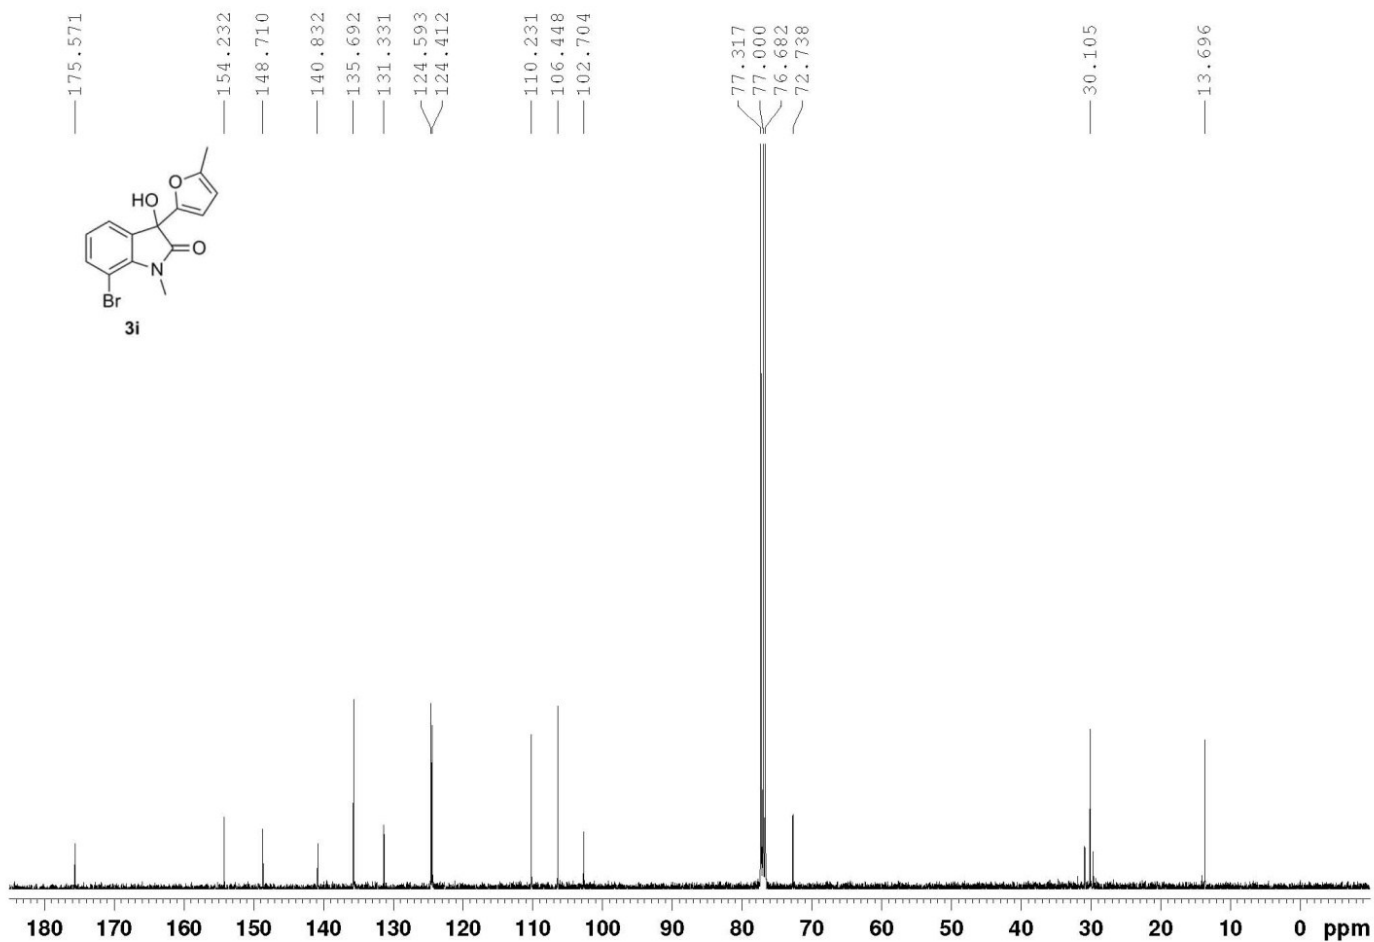

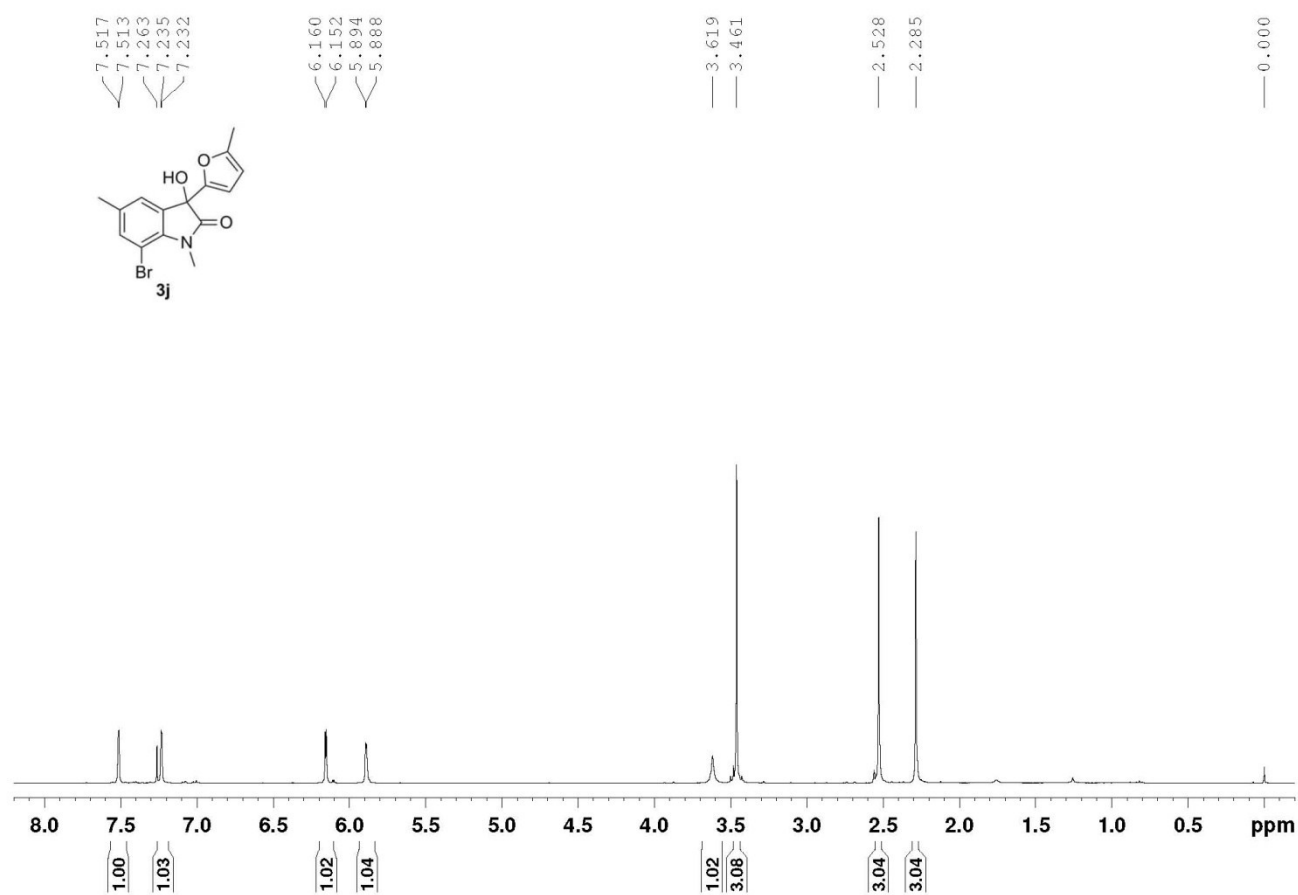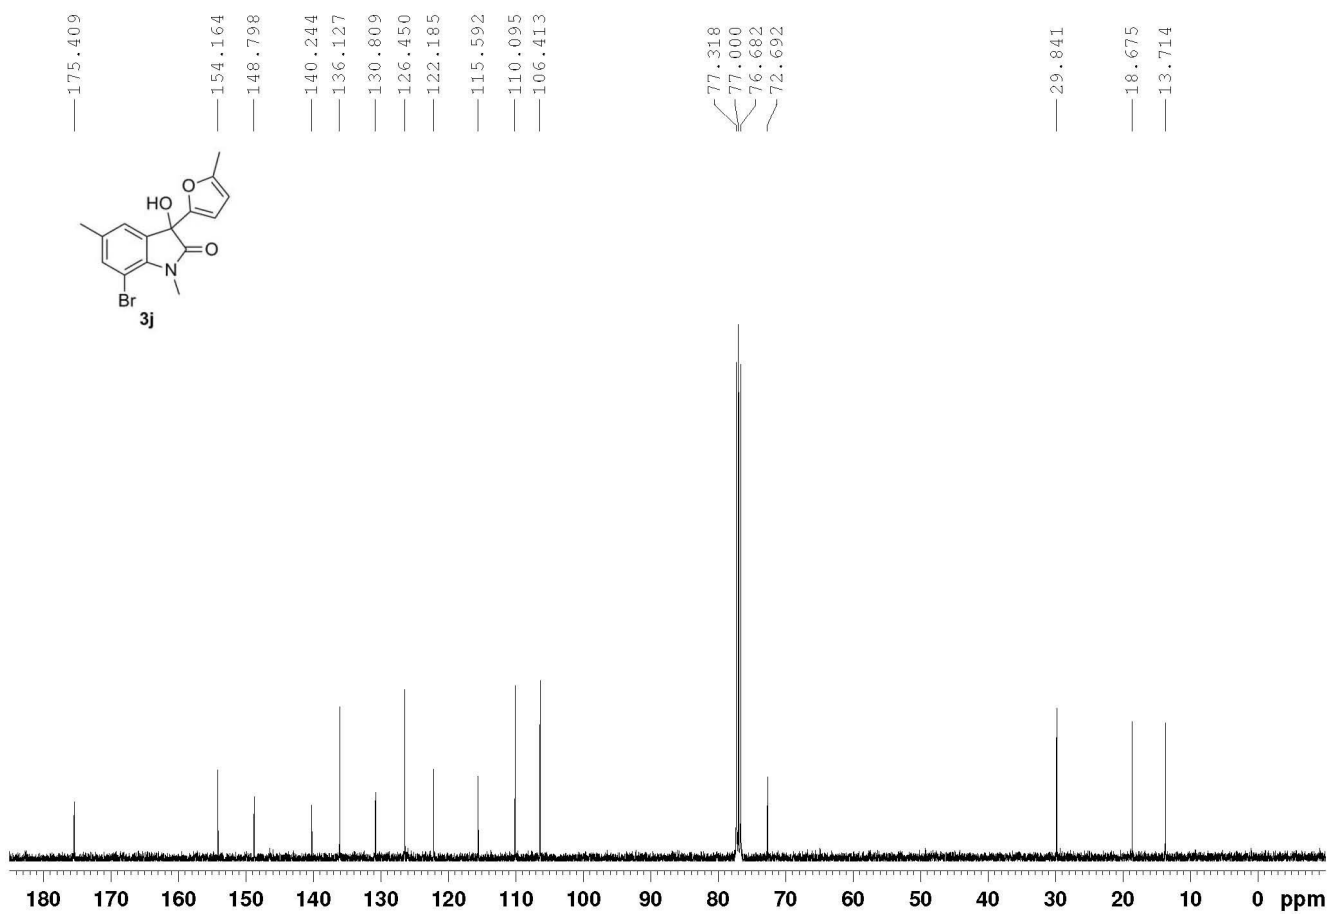



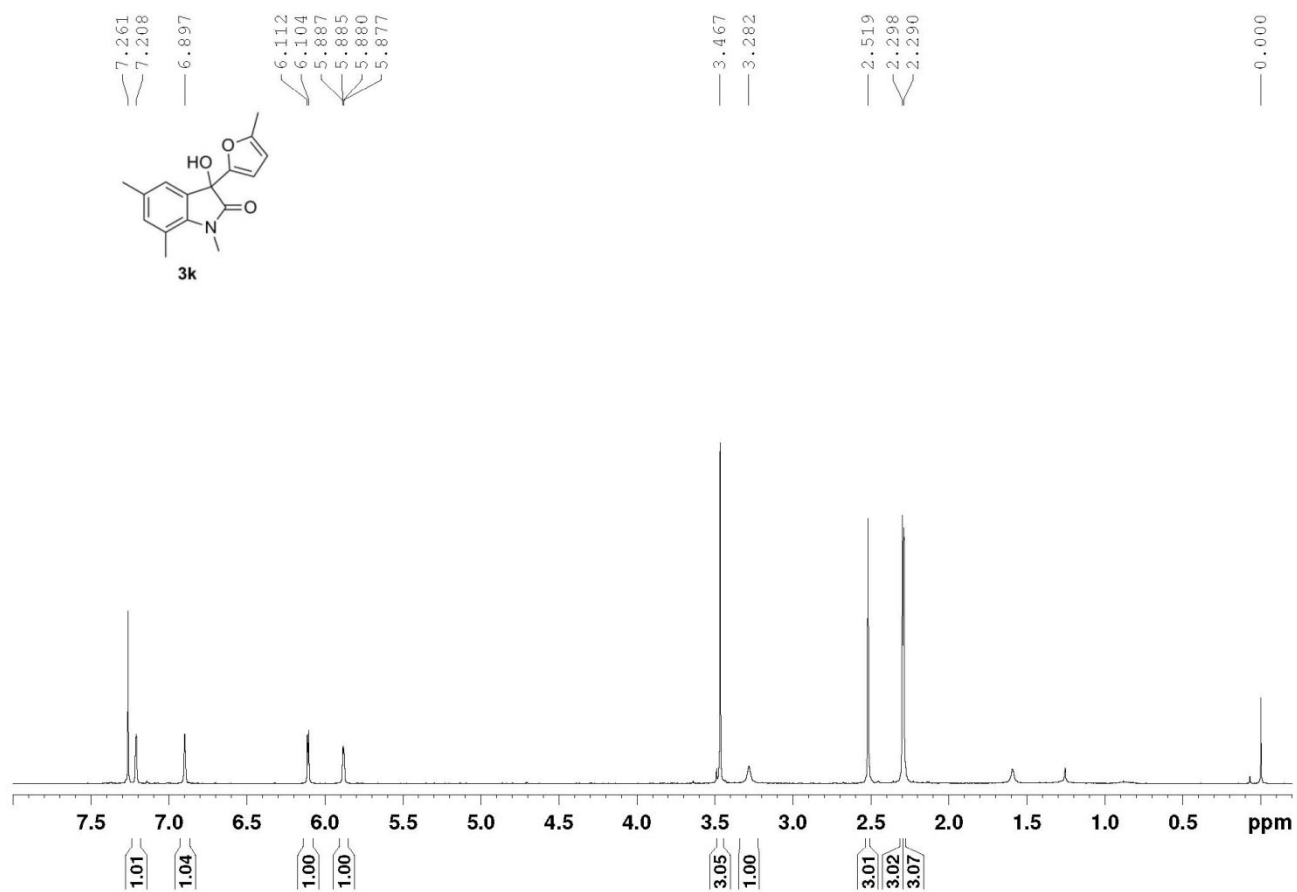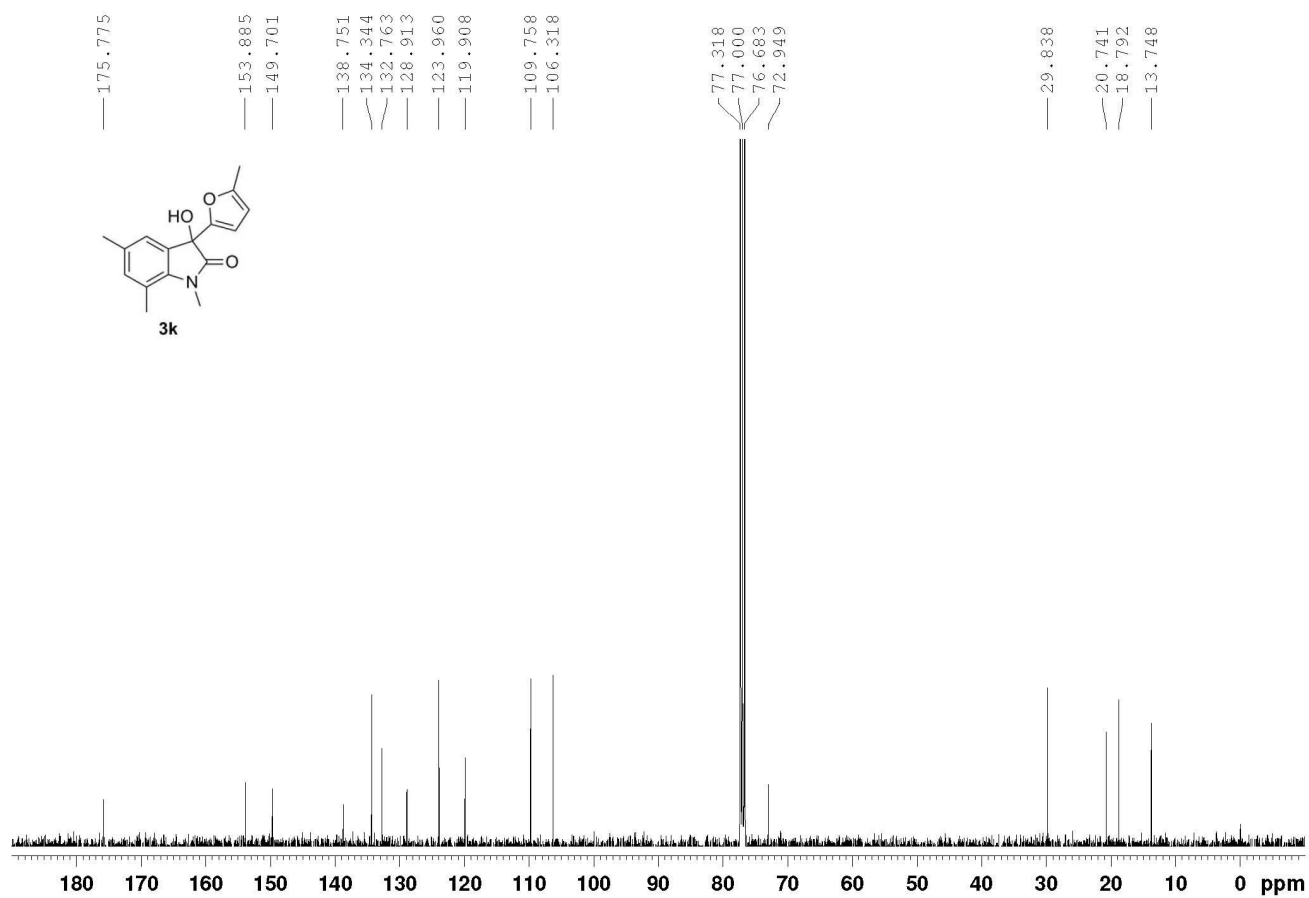

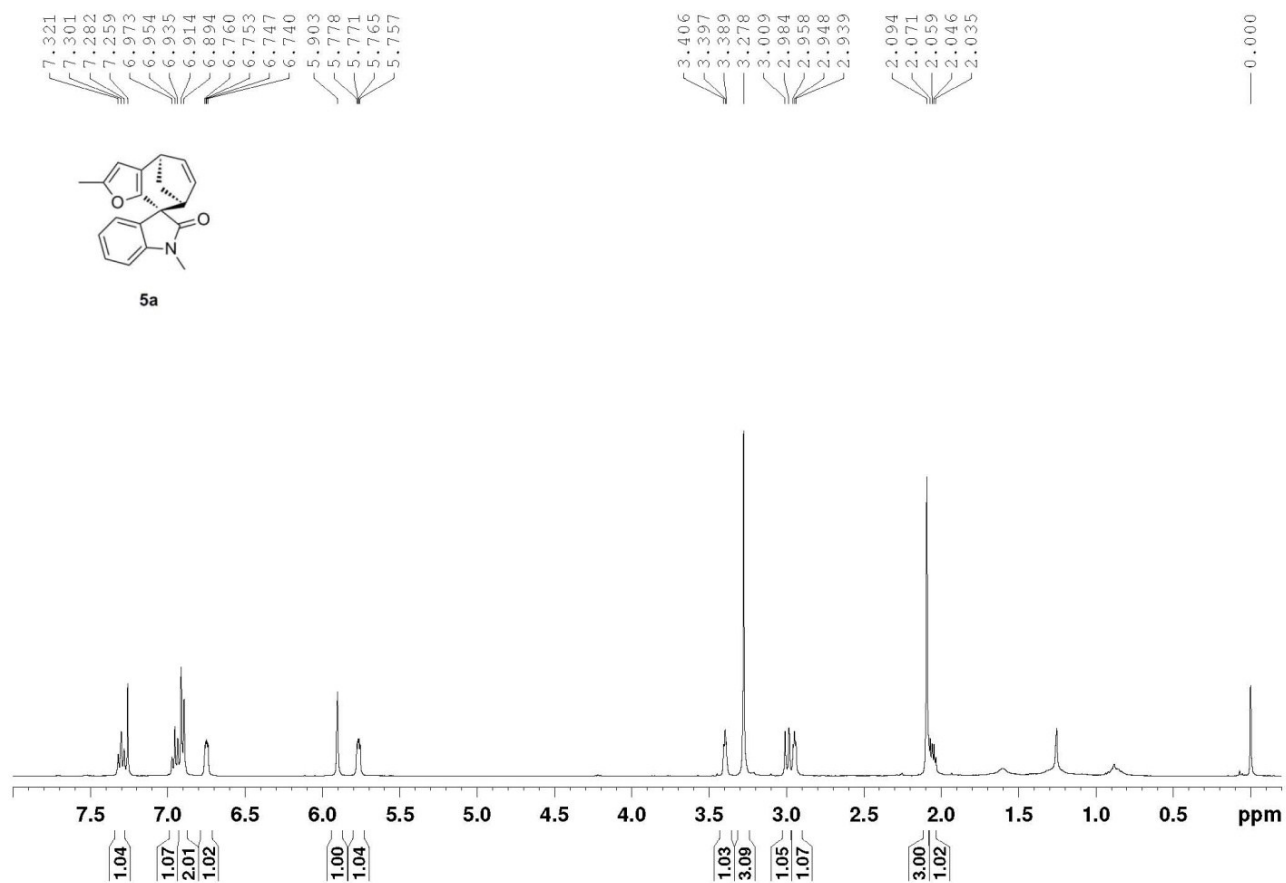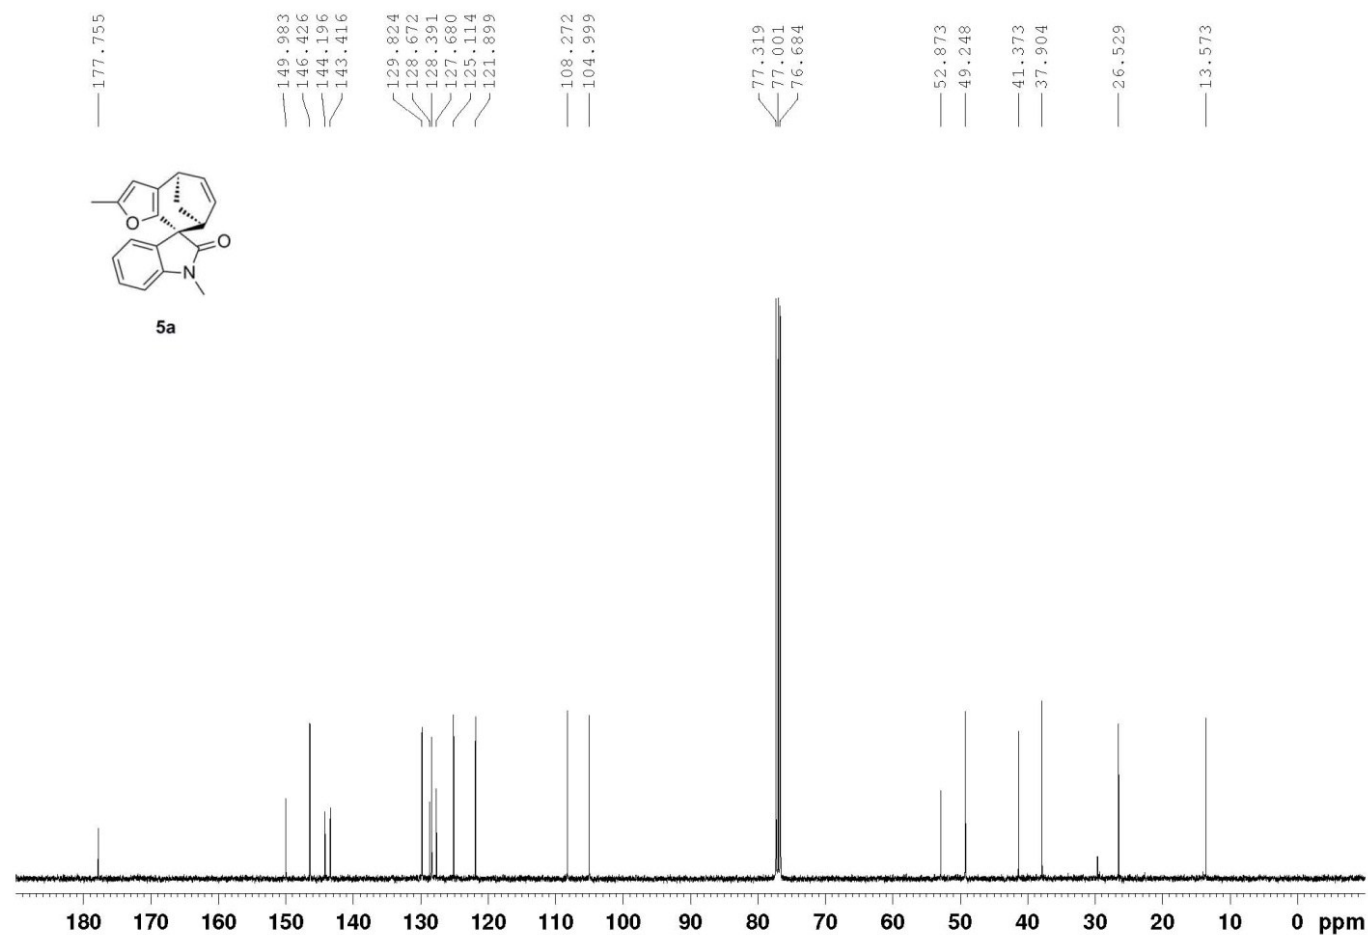

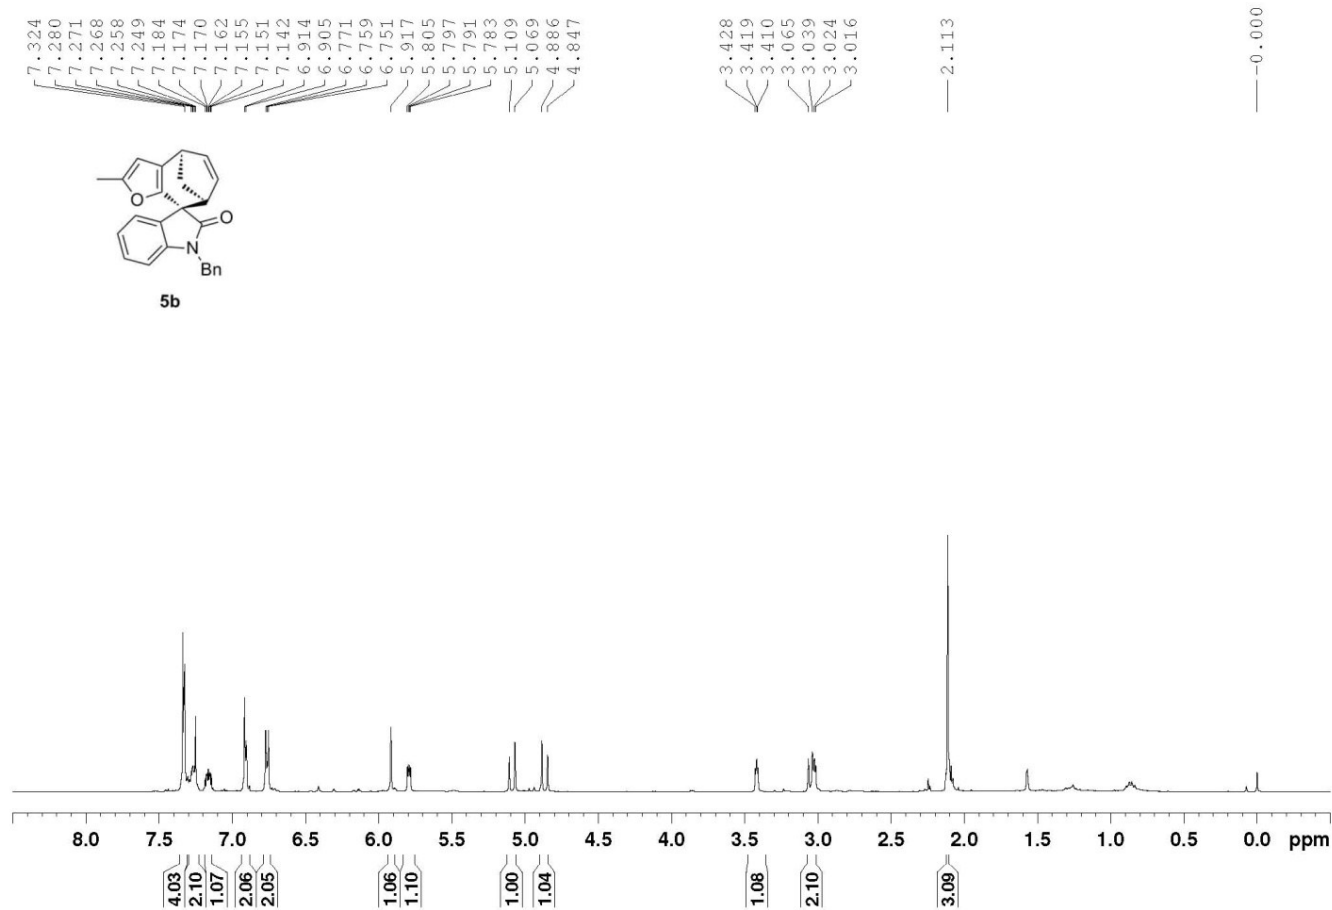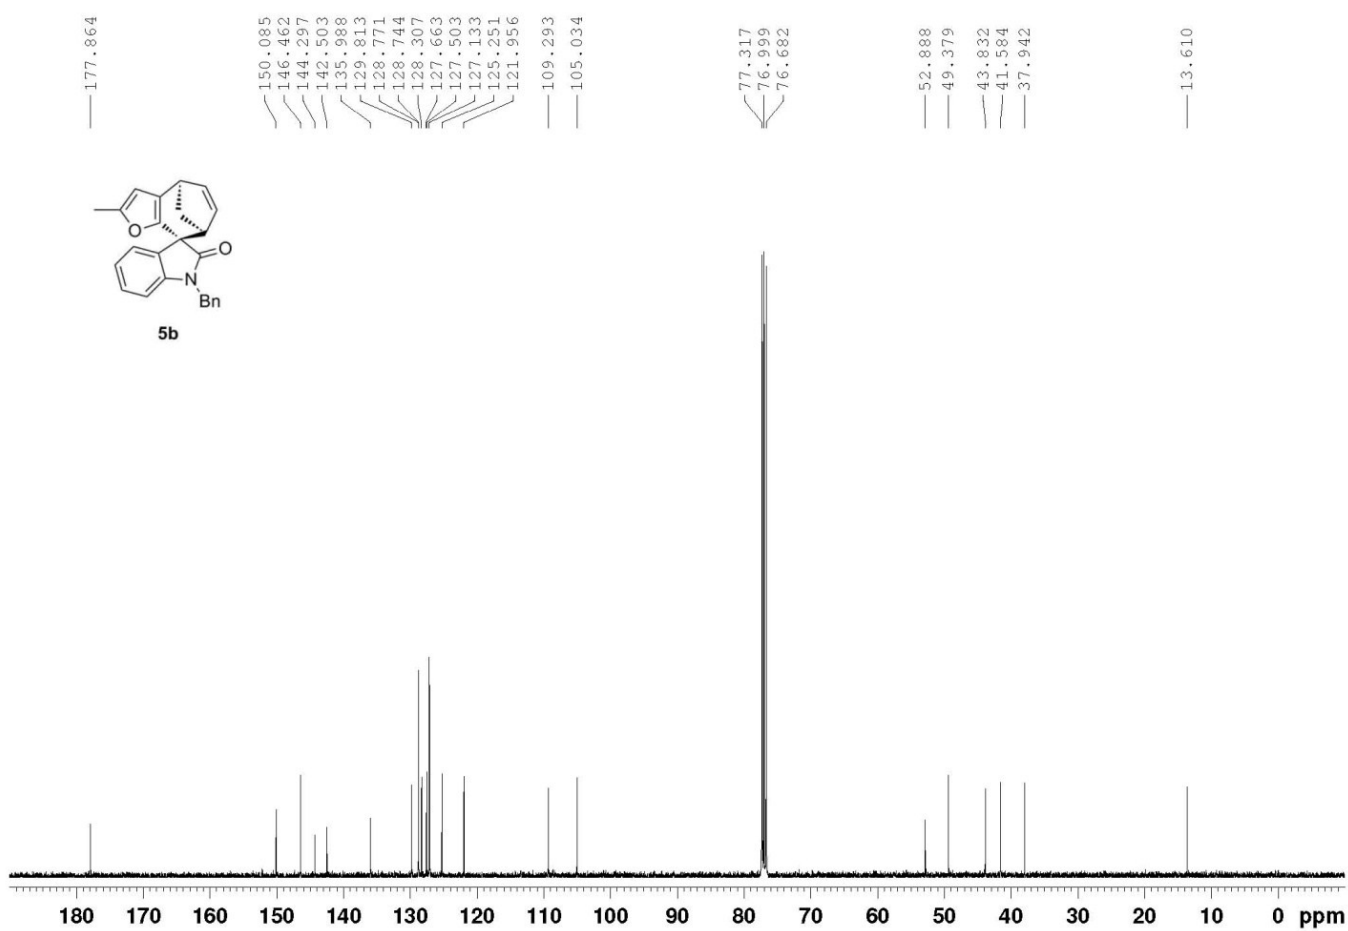

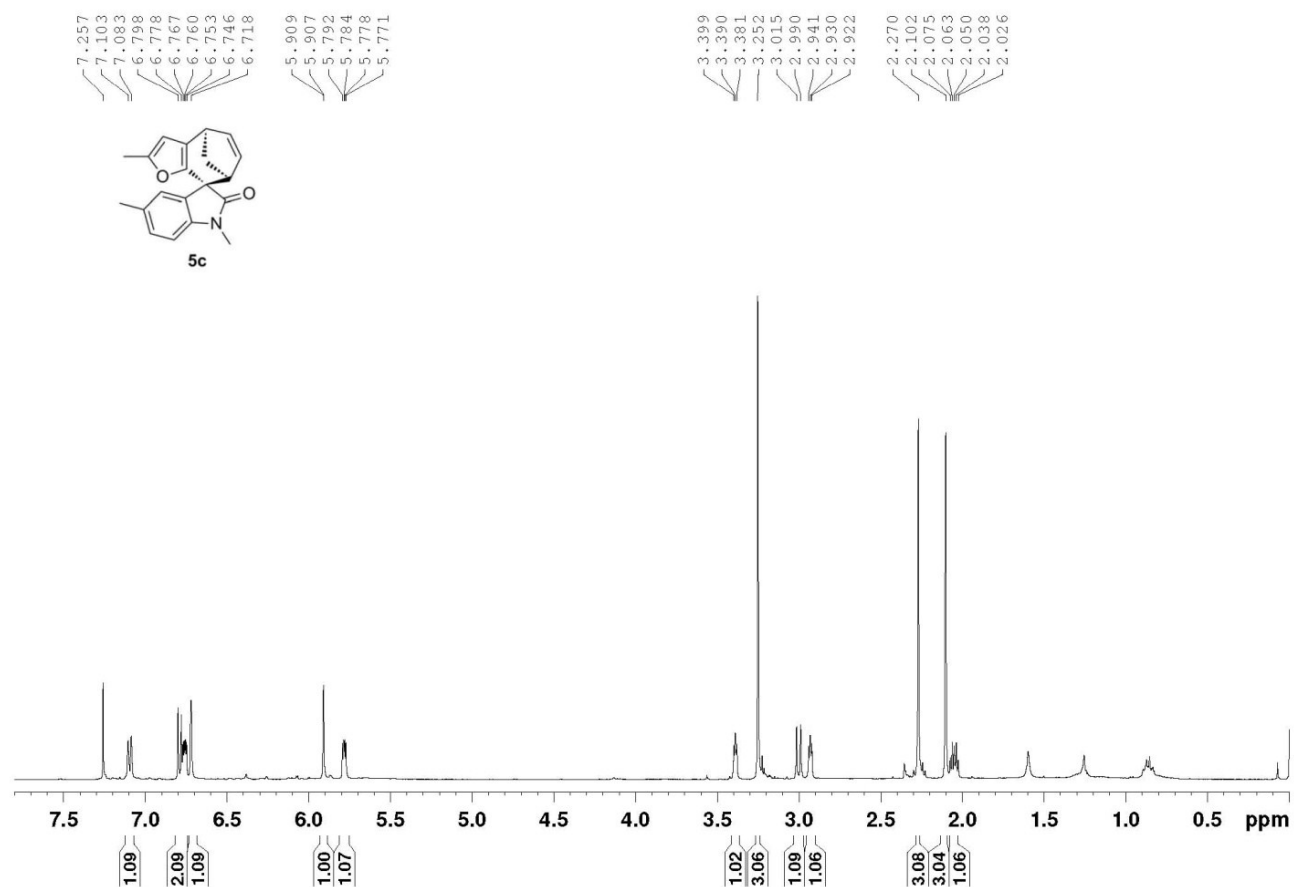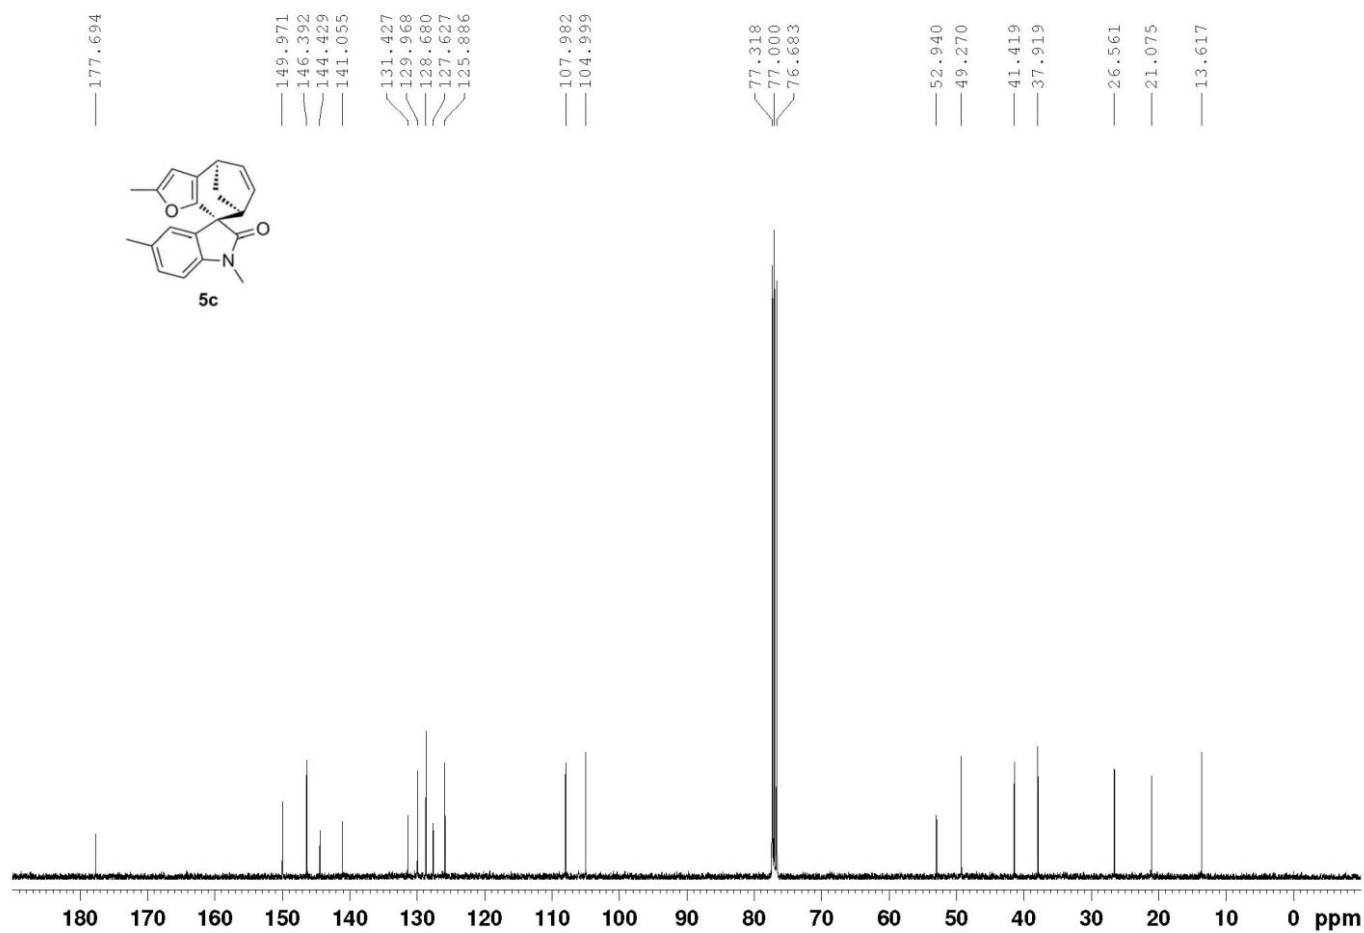

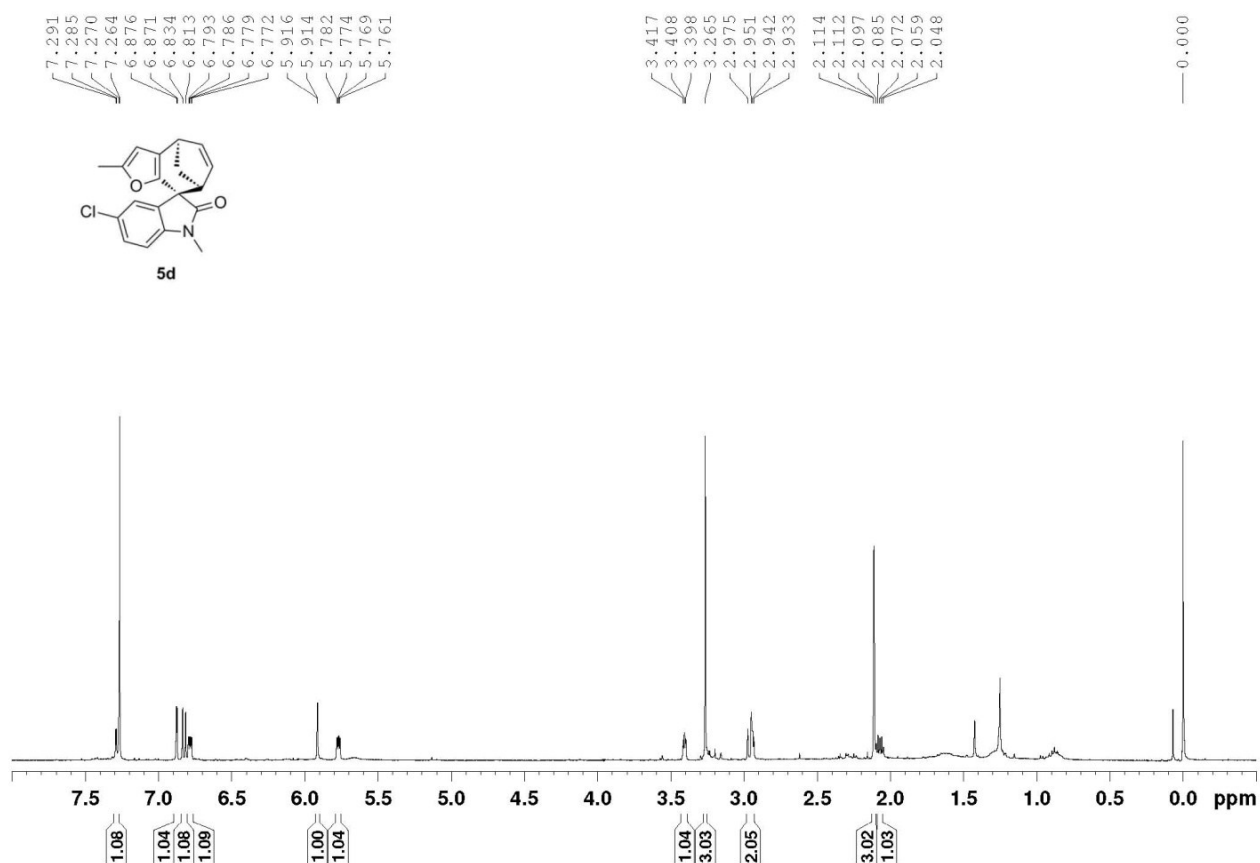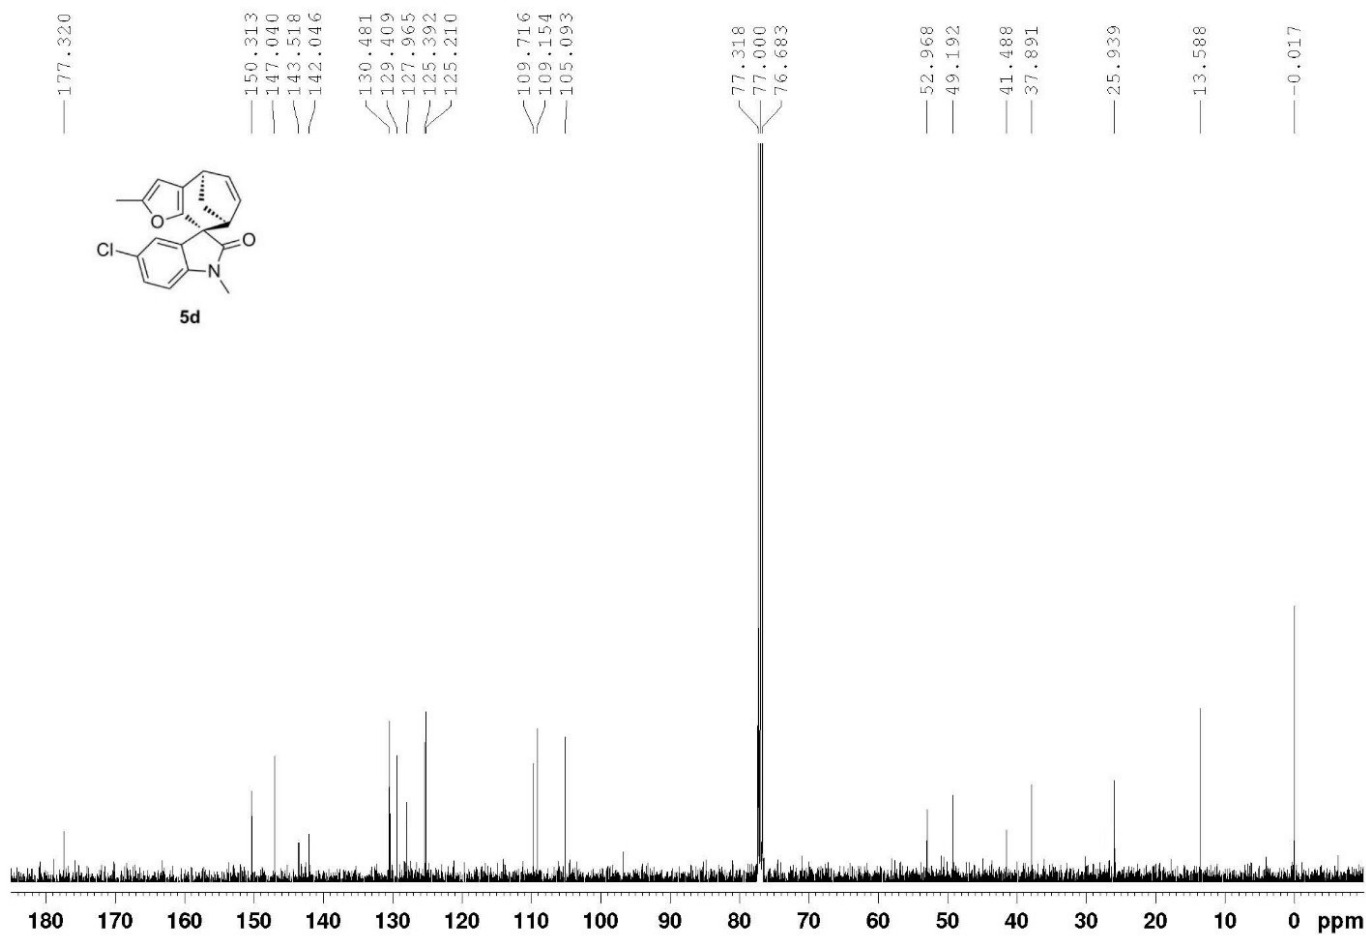

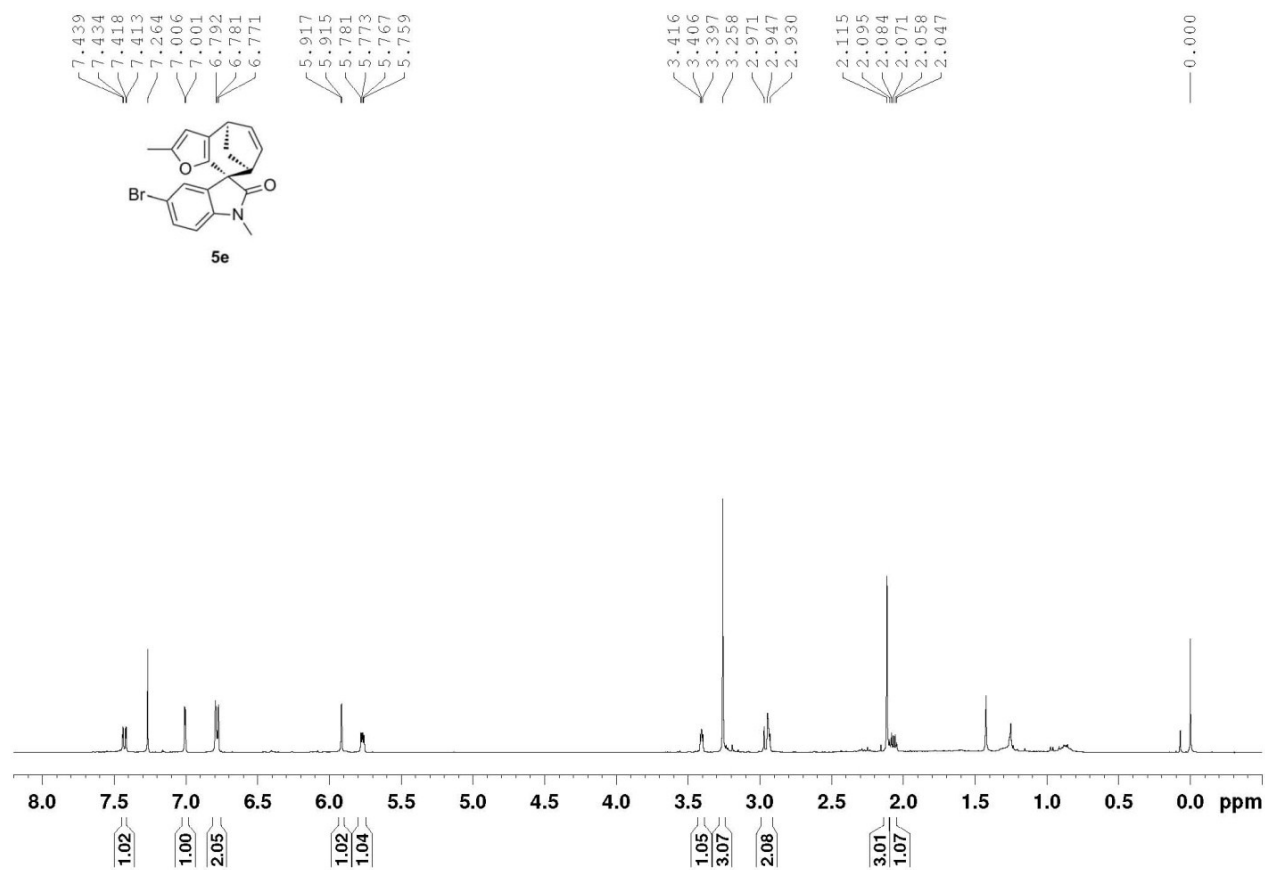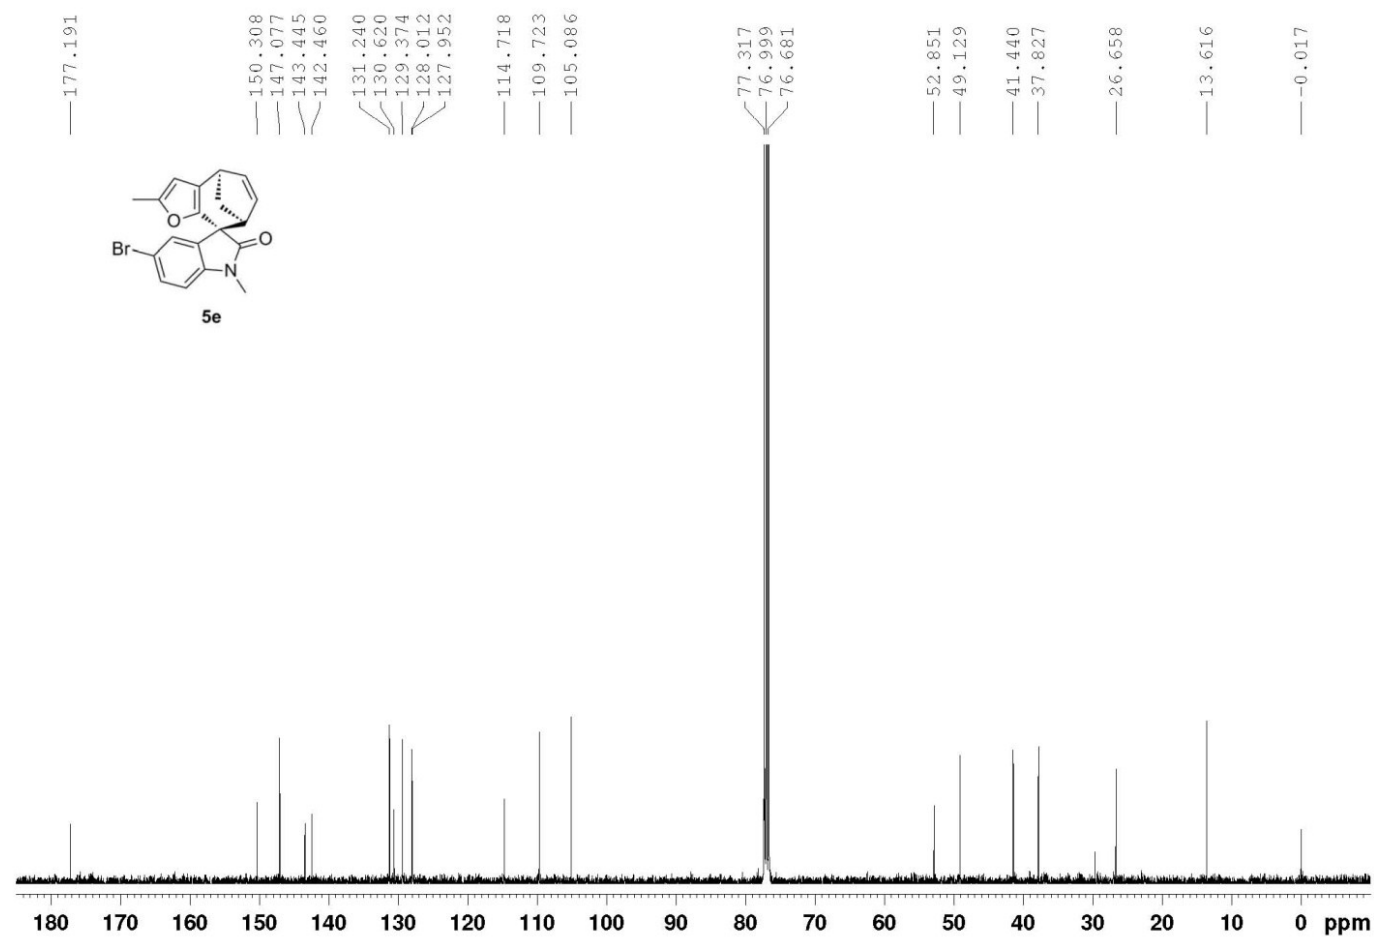

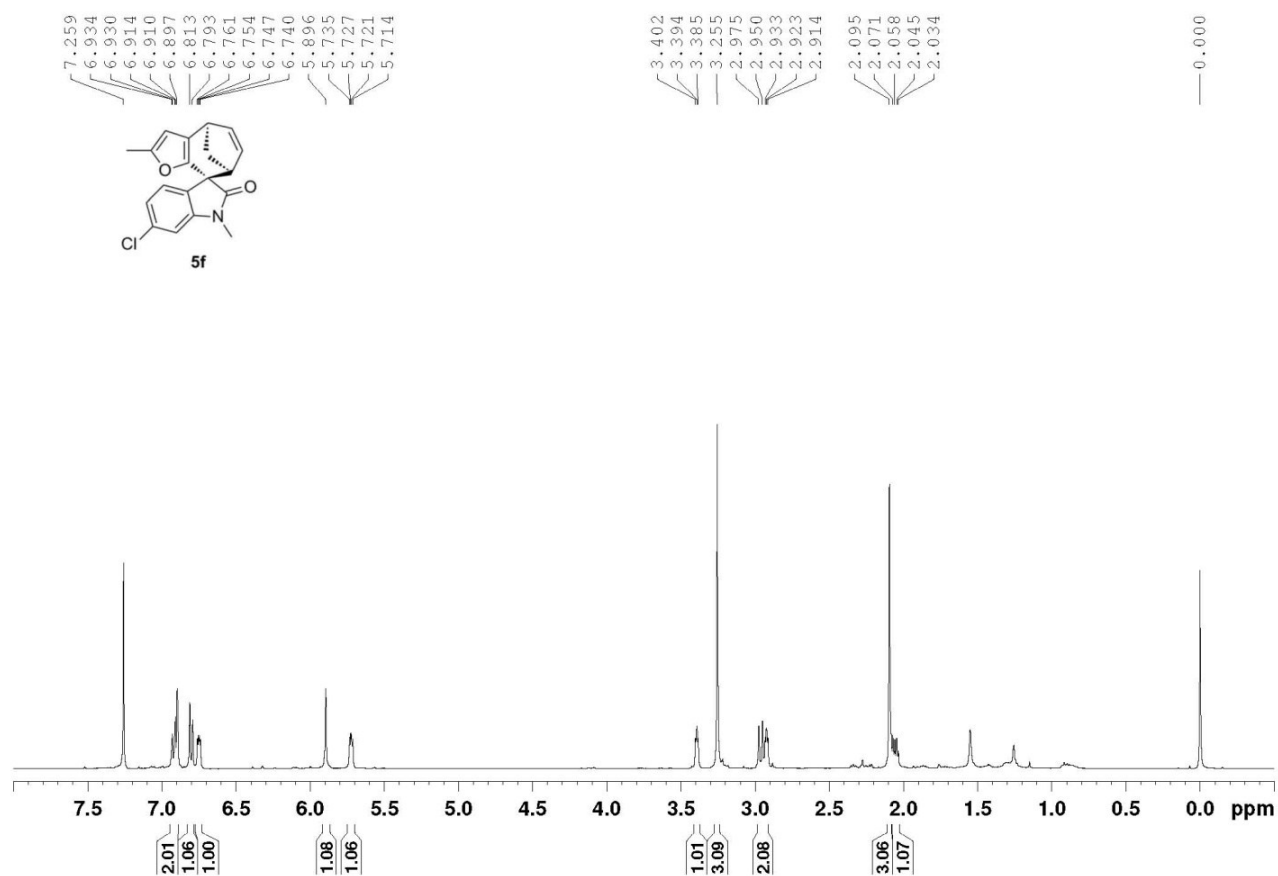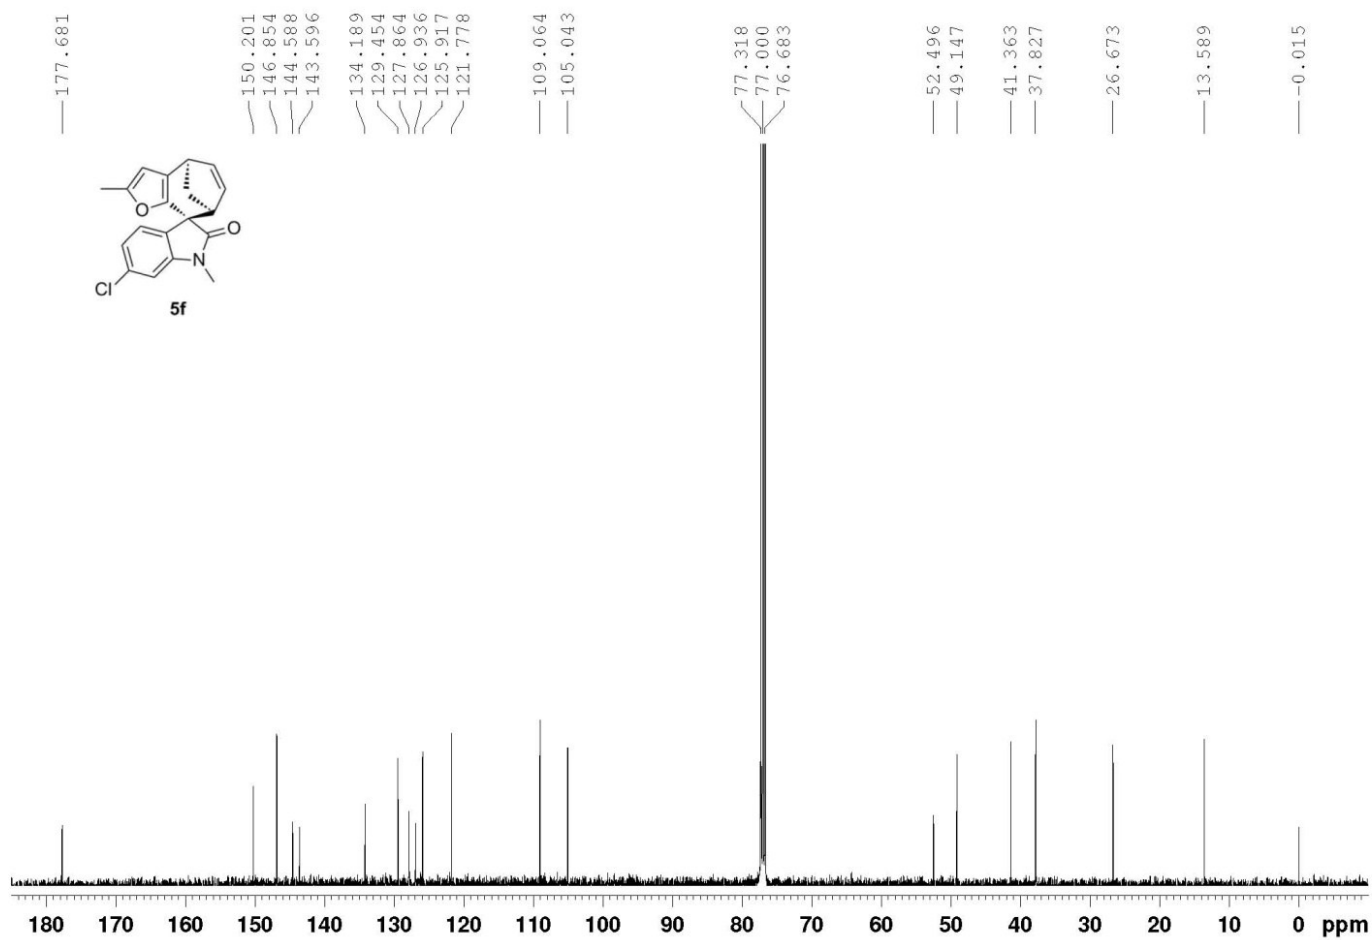

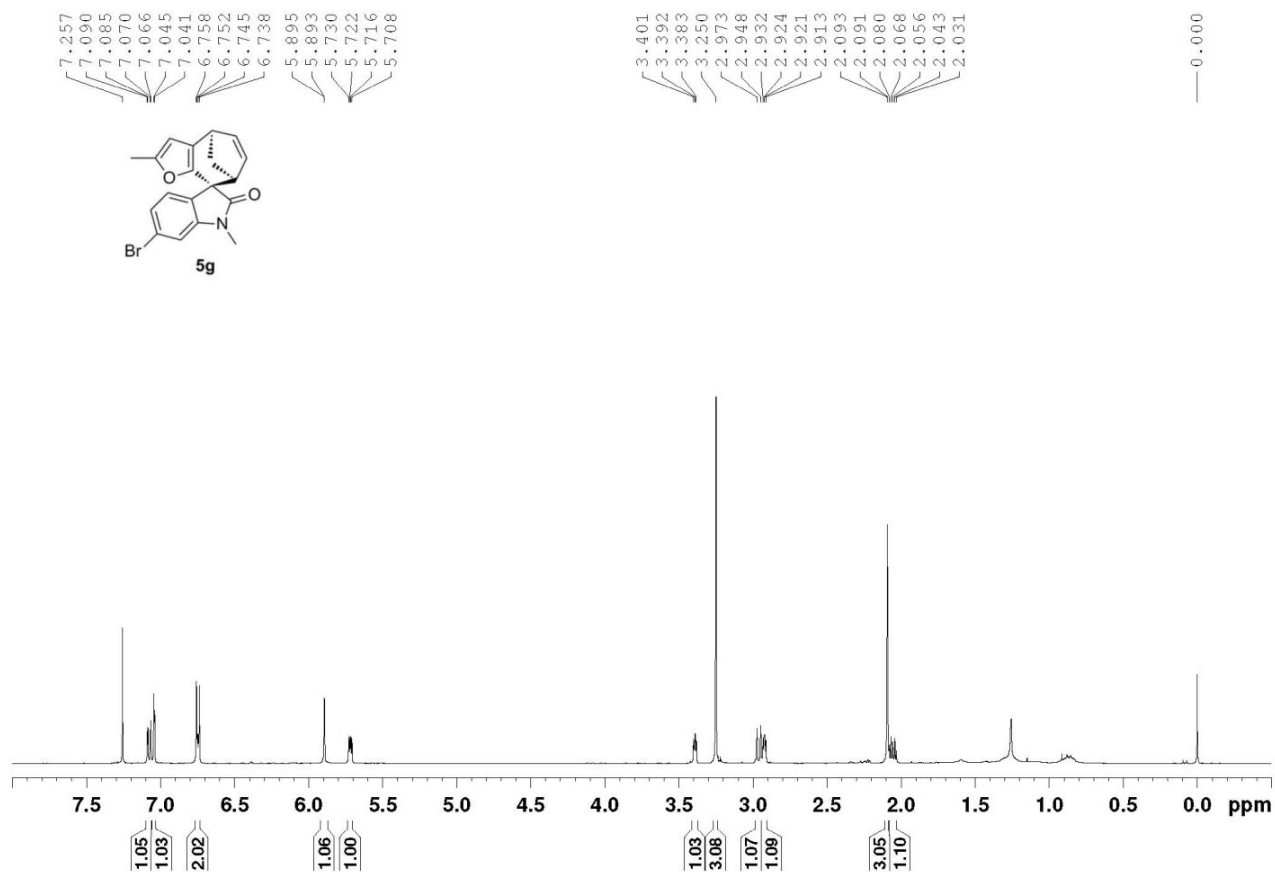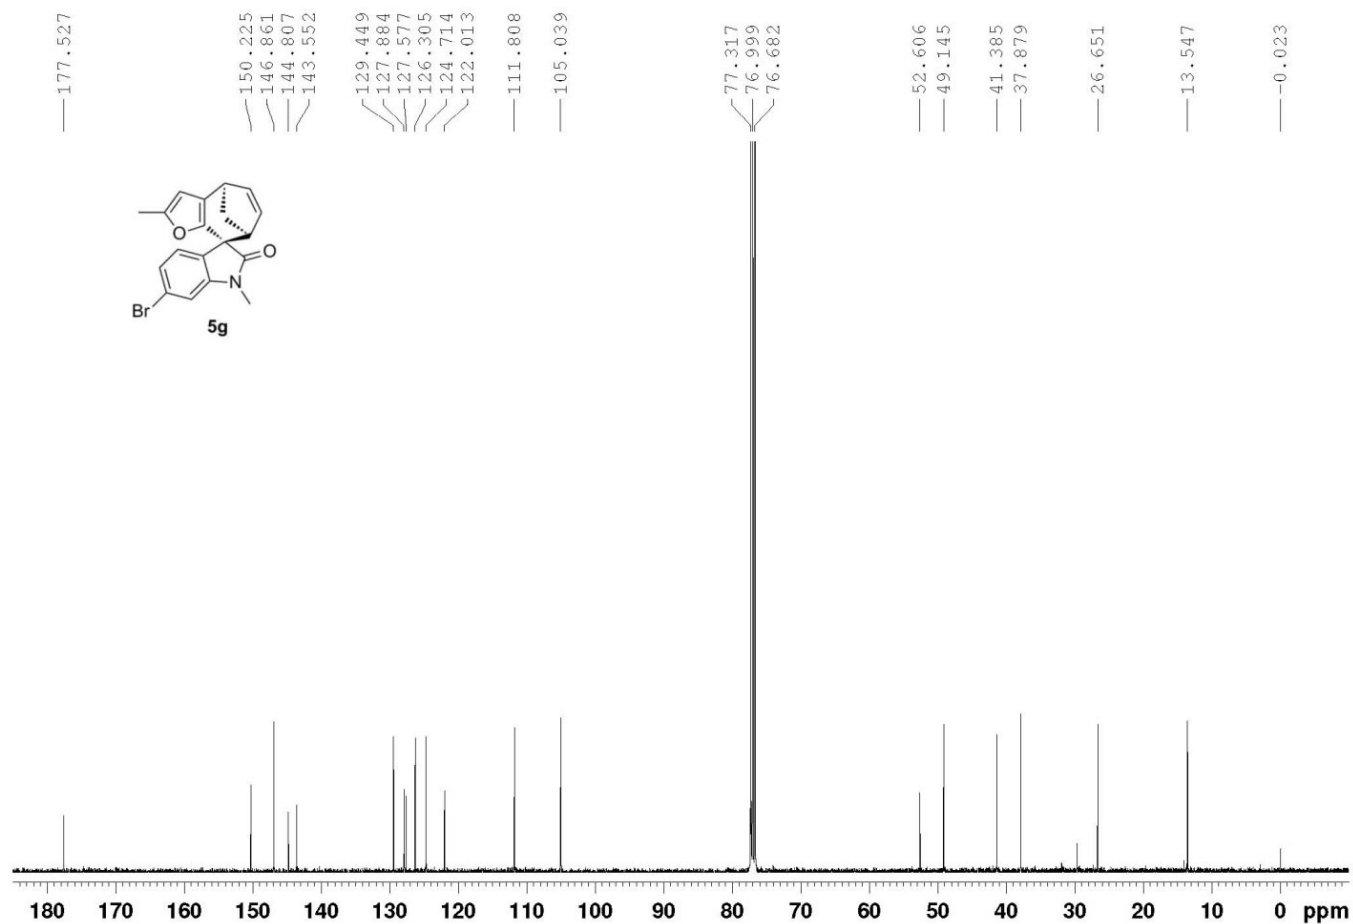



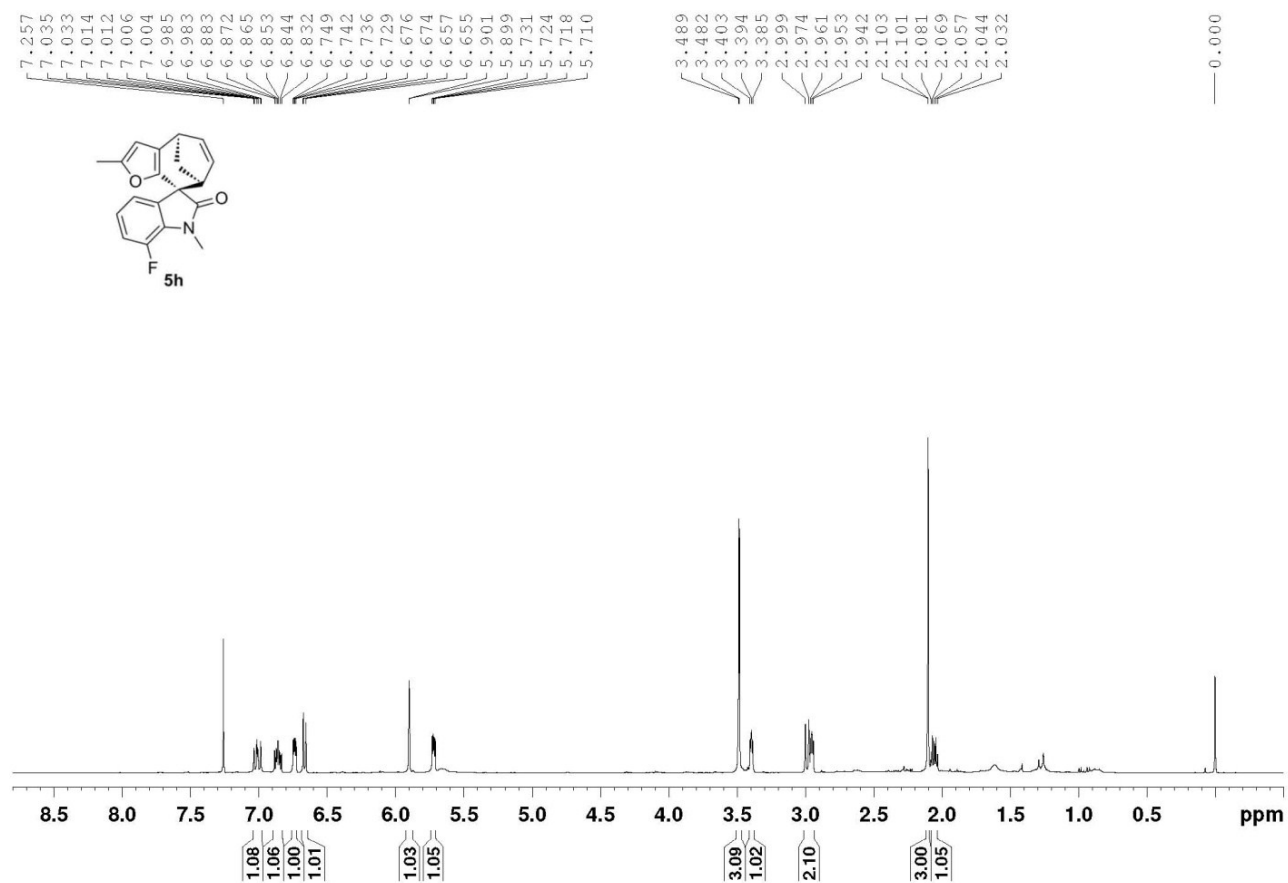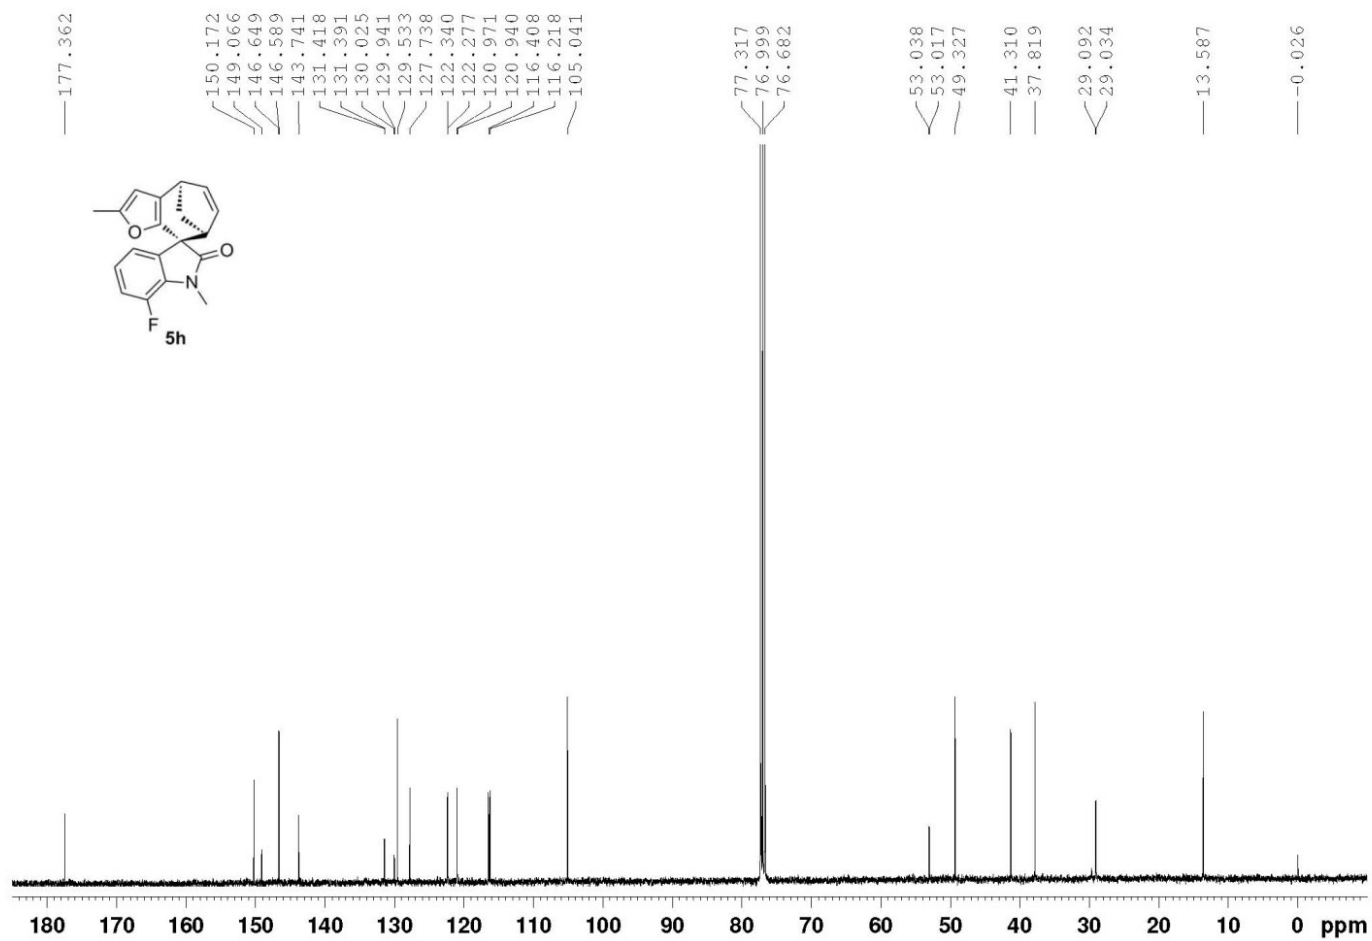

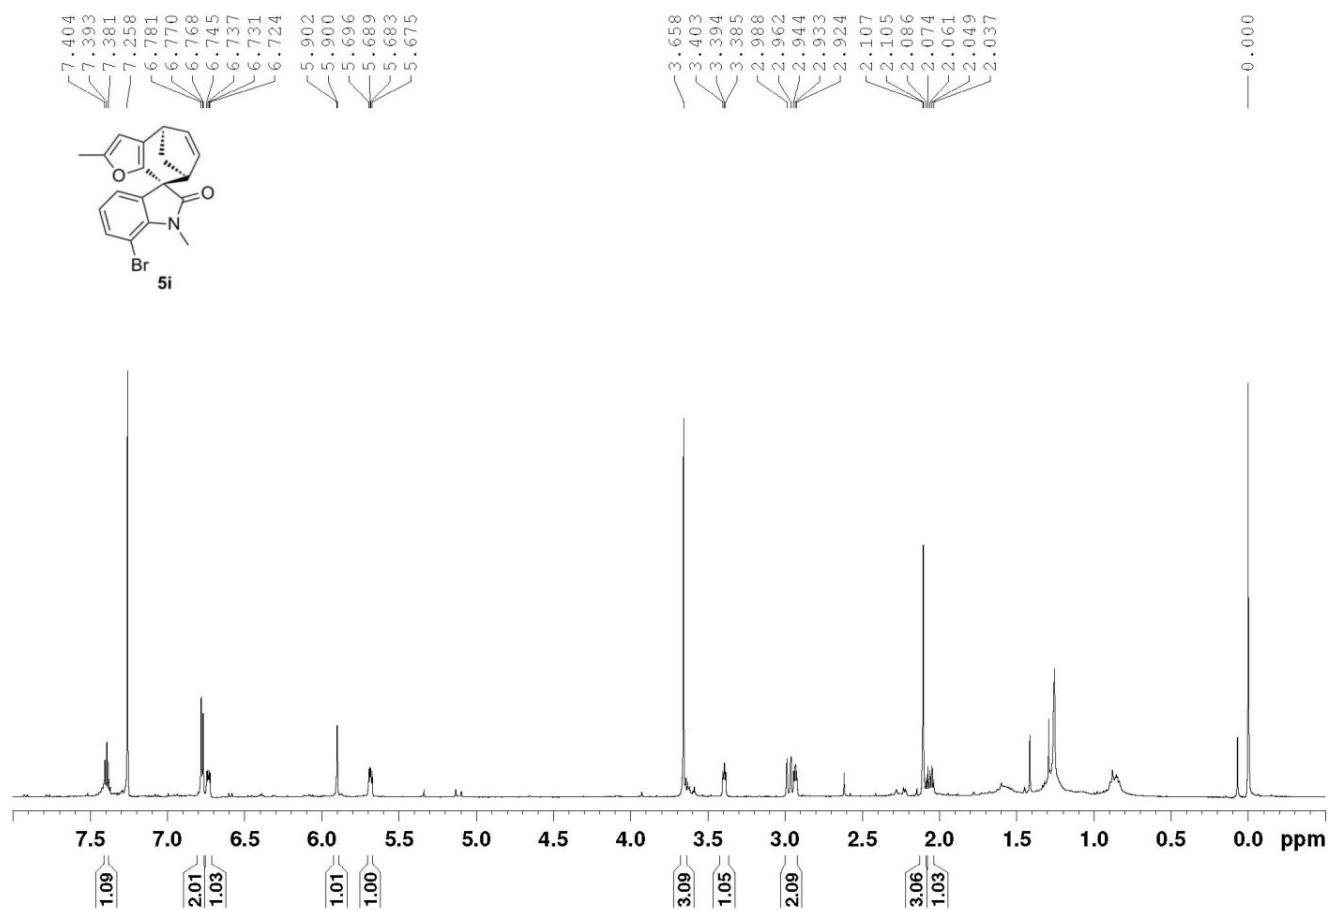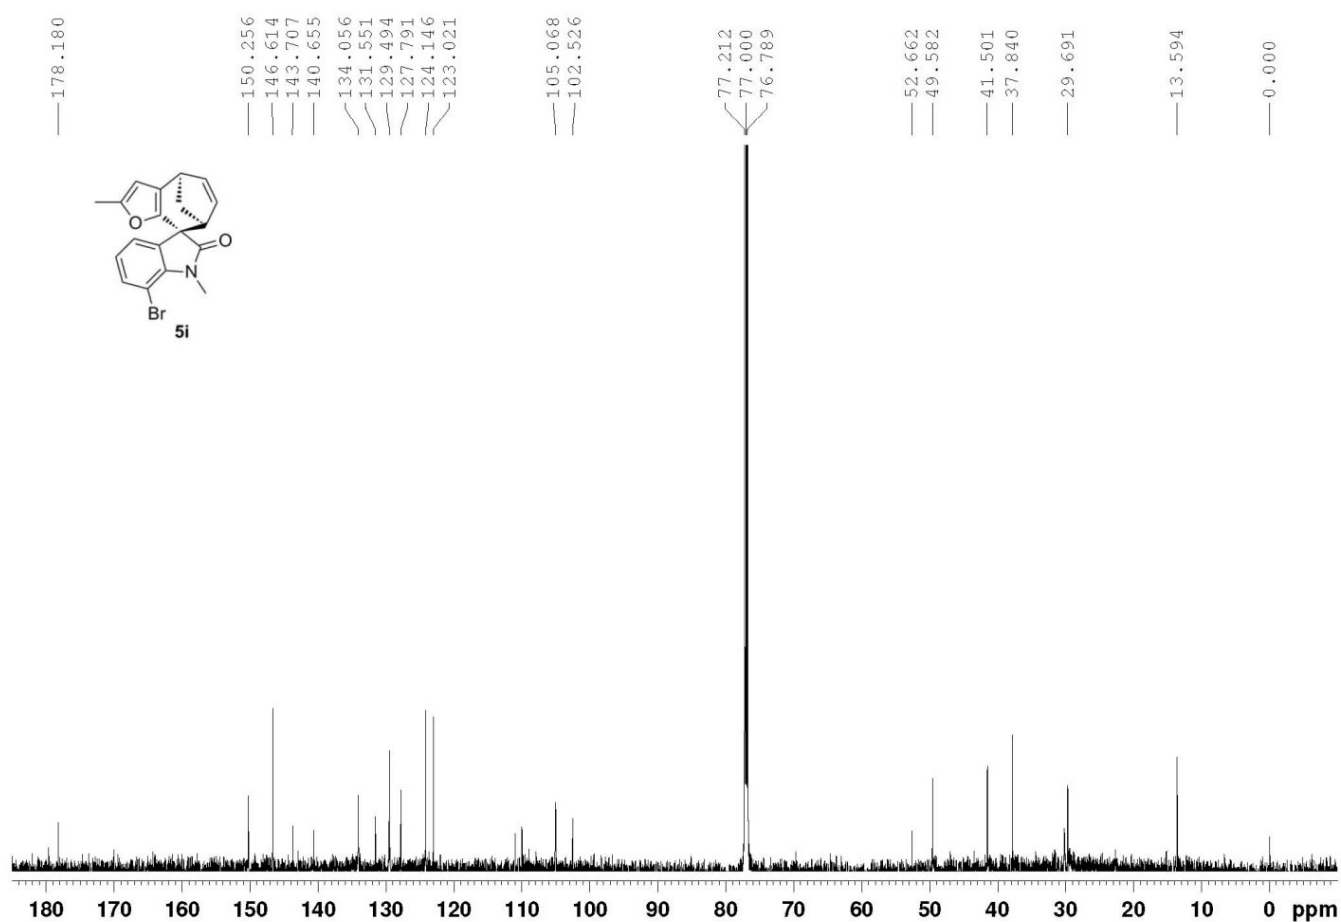

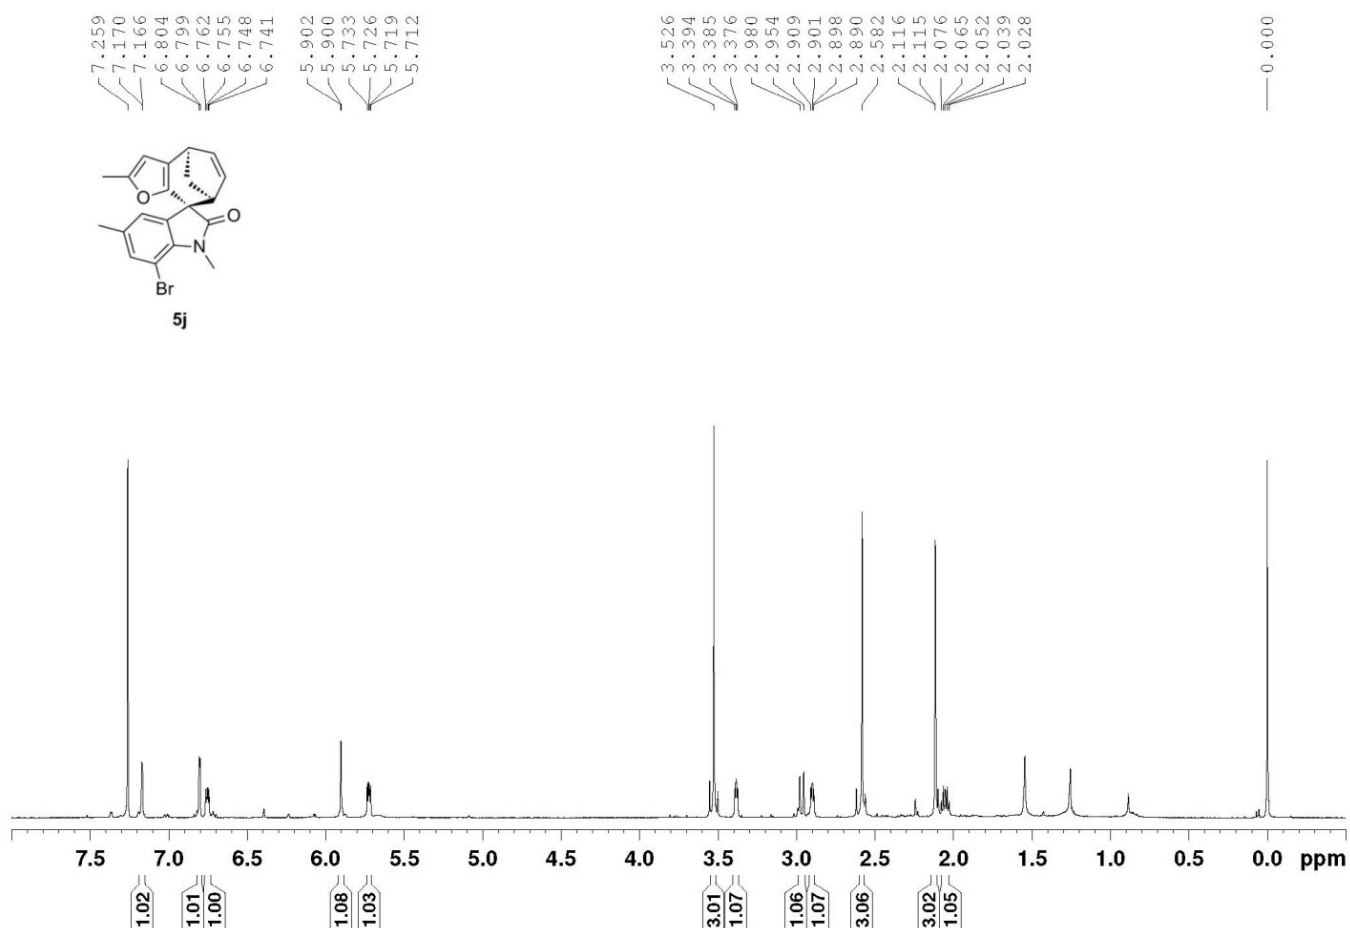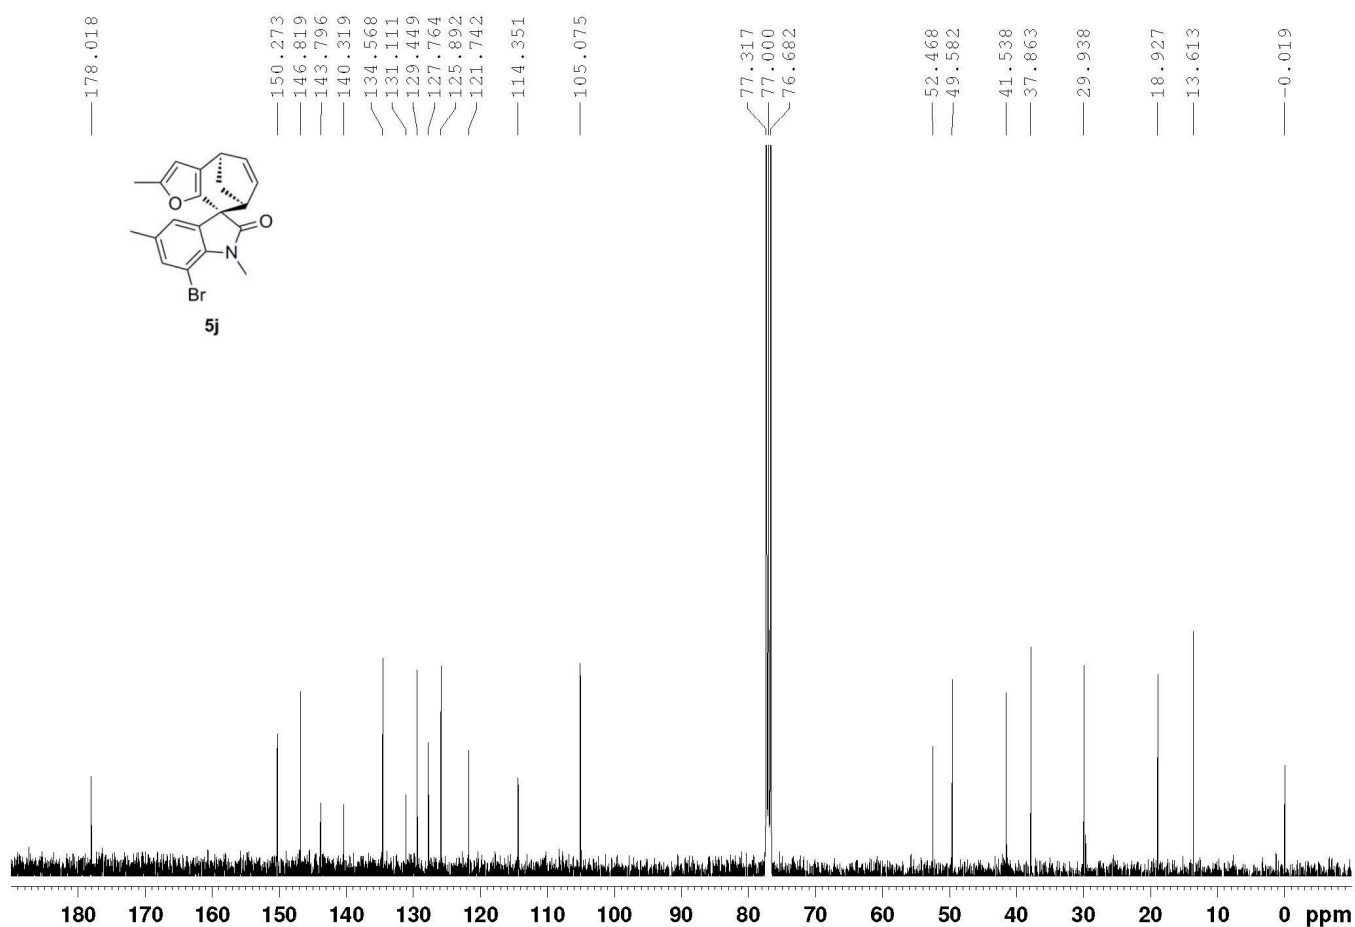

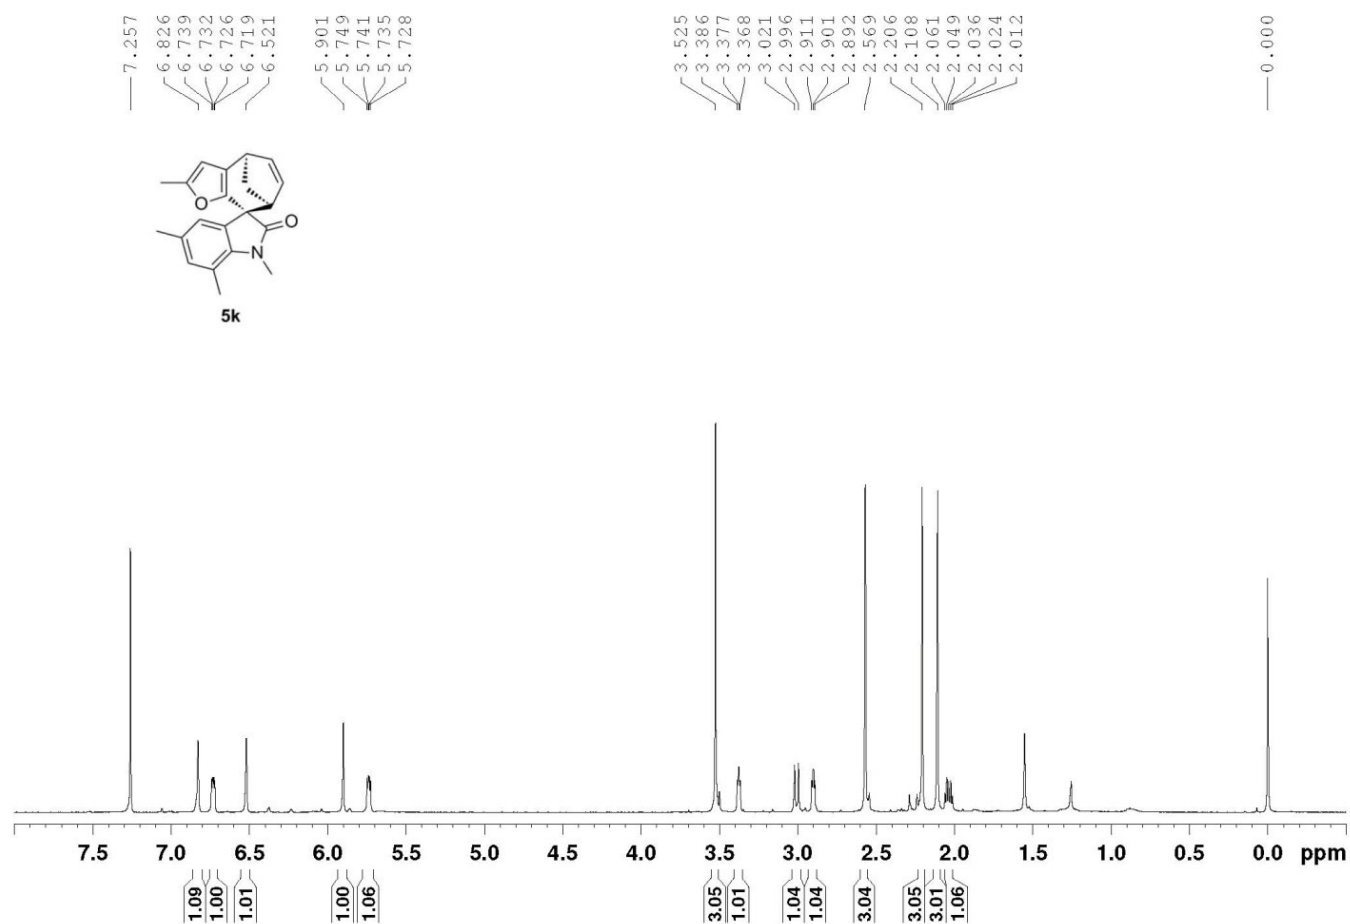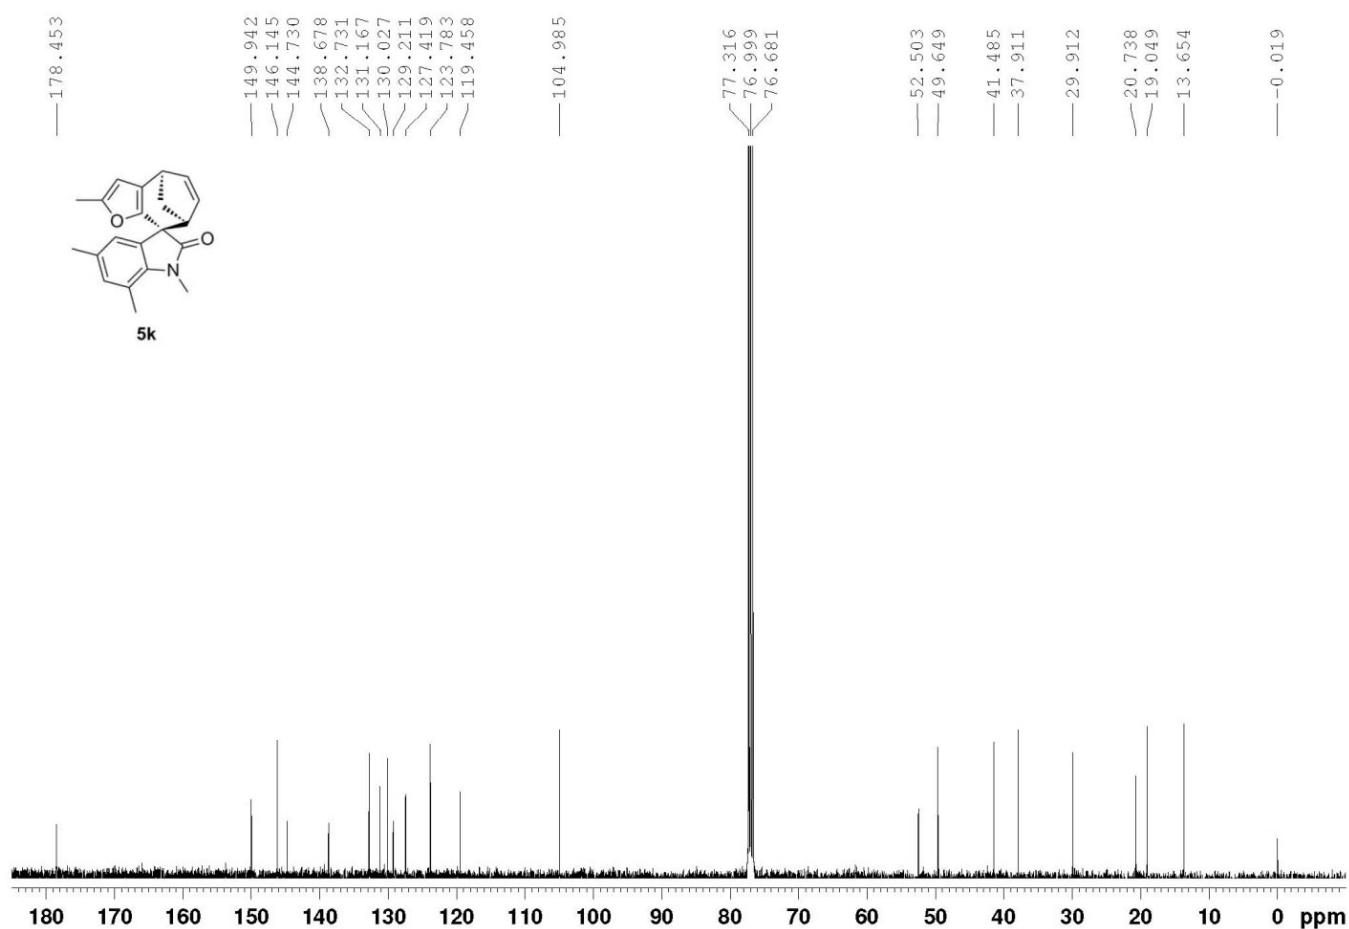

Supplement: c6ra03259a1.pdf [file c6ra03259a1.pdf]
